# Supplementary material
Source: PubMed Central journal article supplement (PMC5033833)
Supplement: jciinsight-1-85935-s001.pdf [file jciinsight-1-85935-s001.pdf]

1  
2  
3  
4 **Supplementary Materials for**

5 **PD-1 Marks Dysfunctional Regulatory T cells in Malignant Gliomas**

6 Daniel E. Lowther<sup>1,†</sup>, Brittany A. Goods<sup>2,†</sup>, Liliana E. Lucca<sup>1,†</sup>, Benjamin A. Lerner<sup>1</sup>, Khadir  
7 Raddassi<sup>1</sup>, David van Dijk<sup>3</sup>, Amanda L. Hernandez<sup>1</sup>, Xiangguo Duan<sup>1,\*</sup>, Murat Gunel<sup>3,4</sup>, Vlad  
8 Coric<sup>5</sup>, Smita Krishnaswamy<sup>3</sup>, J. Christopher Love<sup>2,6,†</sup>, and David A. Hafler<sup>1,6,†</sup>

9 <sup>1</sup>Departments of Neurology and Immunobiology, Yale School of Medicine, New Haven,  
10 Connecticut 06520, <sup>2</sup>Departments of Biological Engineering and Chemical Engineering, Koch  
11 Institute for Integrative Cancer Research, Massachusetts Institute of Technology, Cambridge,  
12 Massachusetts 02139, USA, <sup>3</sup>Department of Genetics, Yale School of Medicine, New Haven,  
13 Connecticut 06520, <sup>4</sup>Department of Neurosurgery, Yale School of Medicine, New Haven,  
14 Connecticut 06520, <sup>5</sup>Bristol-Myers Squibb, Wallingford, Connecticut, 06492, <sup>6</sup>The Broad Institute  
15 of MIT and Harvard, Cambridge, MA 02142, USA.

16  
17  
18 **This PDF file includes:**

19 Materials and Methods

20 Supplementary Figures 1 to 17

21 Supplementary Tables 1 to 11

22 References (64-68)

1  
2  
3  
4  
5  
6  
7  
8  
9  
10  
11  
12  
13  
14  
15  
16  
17  
18  
19  
20  
21  
22  
23  
24  
25  
26  
27  
28  
29  
30  
31  
32

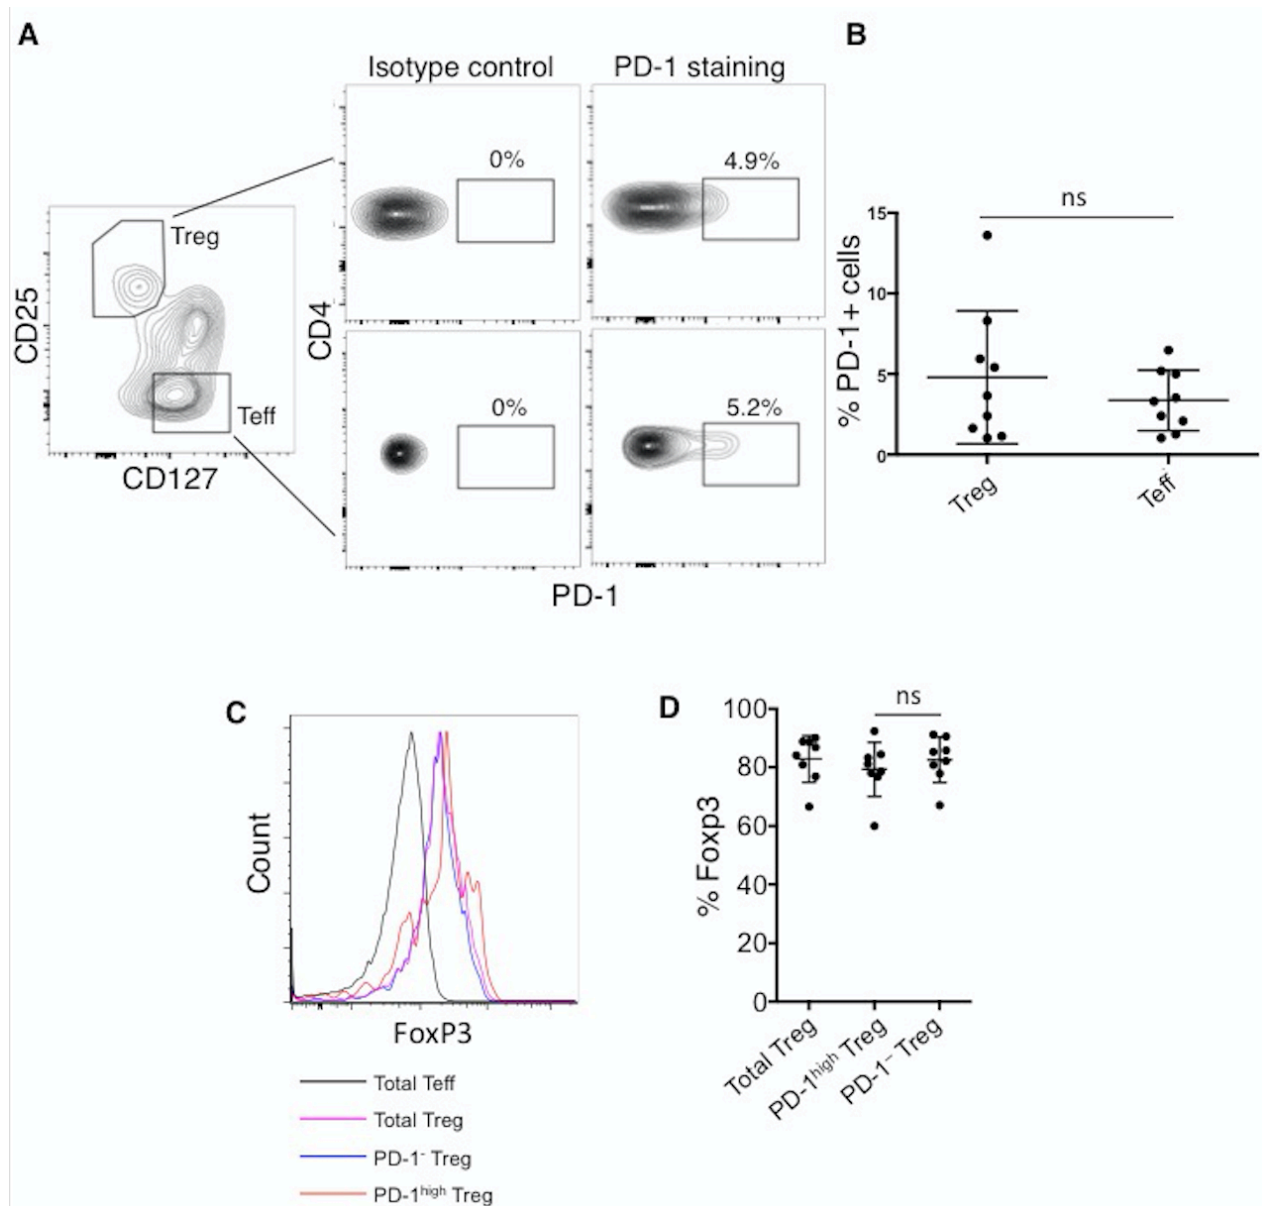

1  
2 **Supplementary Figure 1. Gating strategy for the isolation of Programmed cell death protein**  
3 **1 (PD-1)<sup>high</sup> and PD-1<sup>-</sup> FoxP3<sup>+</sup> Tregs.** **a**, Representative plot showing gates for Tregs  
4 (CD25<sup>hi</sup>CD127<sup>lo</sup>) and Teffs (CD25<sup>lo</sup>CD127<sup>+</sup>) among total CD4<sup>+</sup> cells, and gates for PD-1<sup>high</sup> Tregs  
5 and Teffs based on isotype control **b**, quantification of the frequency of PD-1<sup>high</sup> cells among  
6 Tregs and Teffs. N = 9, mean +/- S.D., paired Student's t test . **c**, Representative FoxP3 staining  
7 of total Teff (black line), total Tregs (purple line), PD-1<sup>-</sup> Tregs (blue line) and PD-1<sup>high</sup> Tregs (red  
8 line). **d**, Frequency of Foxp3% cells among total, PD-1<sup>high</sup> and PD-1<sup>-</sup> Treg gates for 8 individuals,  
9 mean + S.D, paired Student's t test.

10

1  
2

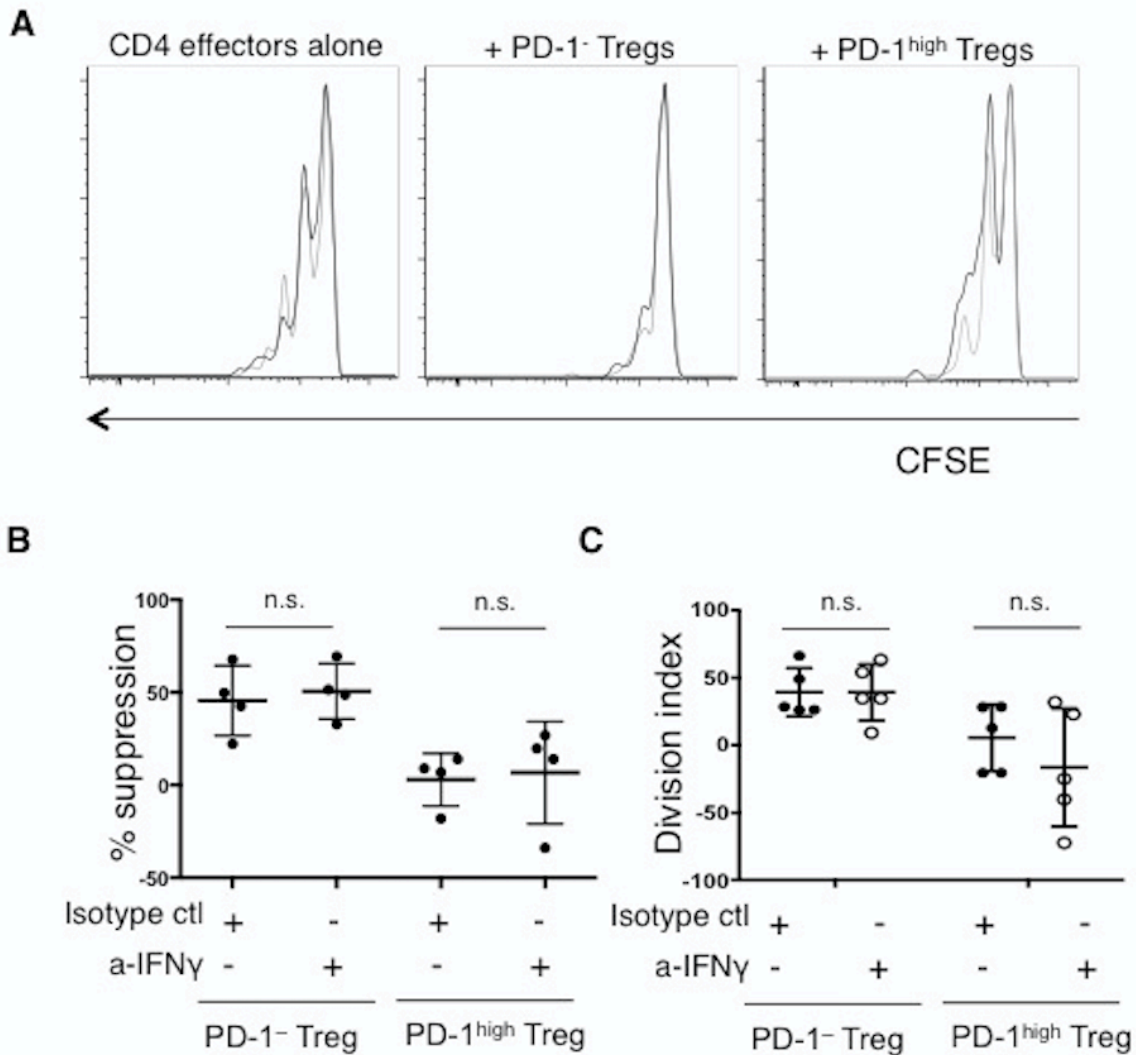

3  
4  
5  
6  
7  
8  
9  
10  
11  
12

**Supplementary Figure 2. Blocking IFN $\gamma$  doesn't restore suppression activity in Programmed cell death protein 1 (PD-1)<sup>high</sup> Tregs.** a, Proliferation of T effectors co-cultured with PD-1<sup>-</sup> or PD-1<sup>high</sup> Tregs (Teff/Treg ratio 1:2) in the presence of a blocking anti-IFN $\gamma$  antibody (grey line) or an isotype control (black line). Treg and Teff were stimulated for 4 days with aCD3/aCD28/aCD2. b, Percentage of suppression of 4 individuals calculated from the percentage of divided cells, or c, division index. For b, c Mean + S.D, Student's t test.

1  
2  
3  
4  
5

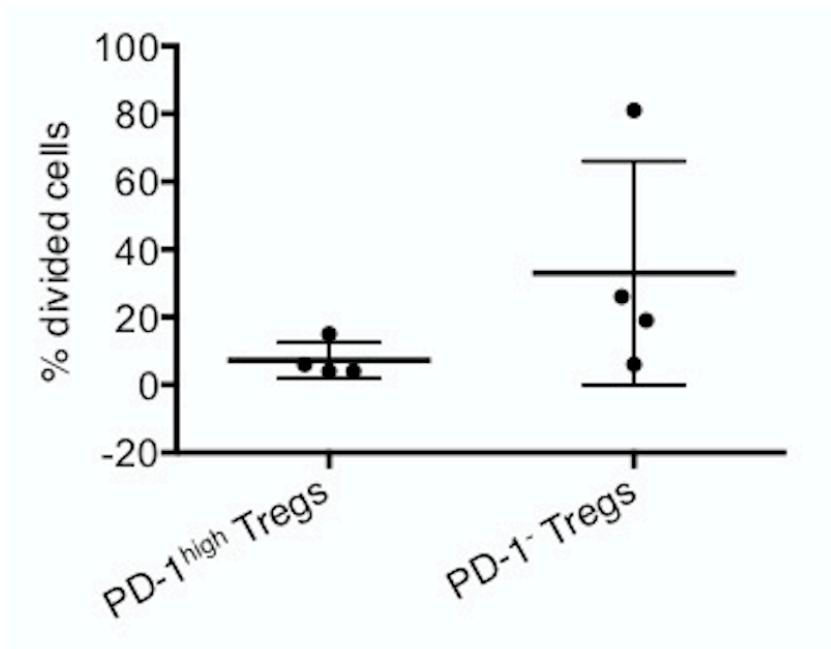

6  
7  
8  
9  
10

**Supplementary Figure 3. Programmed cell death protein 1 (PD-1)<sup>high</sup> Tregs display reduced proliferation in vitro.** Proliferation of sorted Tregs stimulated for 4 days with aCD3/aCD28/aCD2 in the presence of IL-2, assessed as dilution of CFSE. CFSE<sup>low</sup> Tregs were gated among live FoxP3<sup>+</sup> cells. Mean + S.D. of 4 individuals.

1

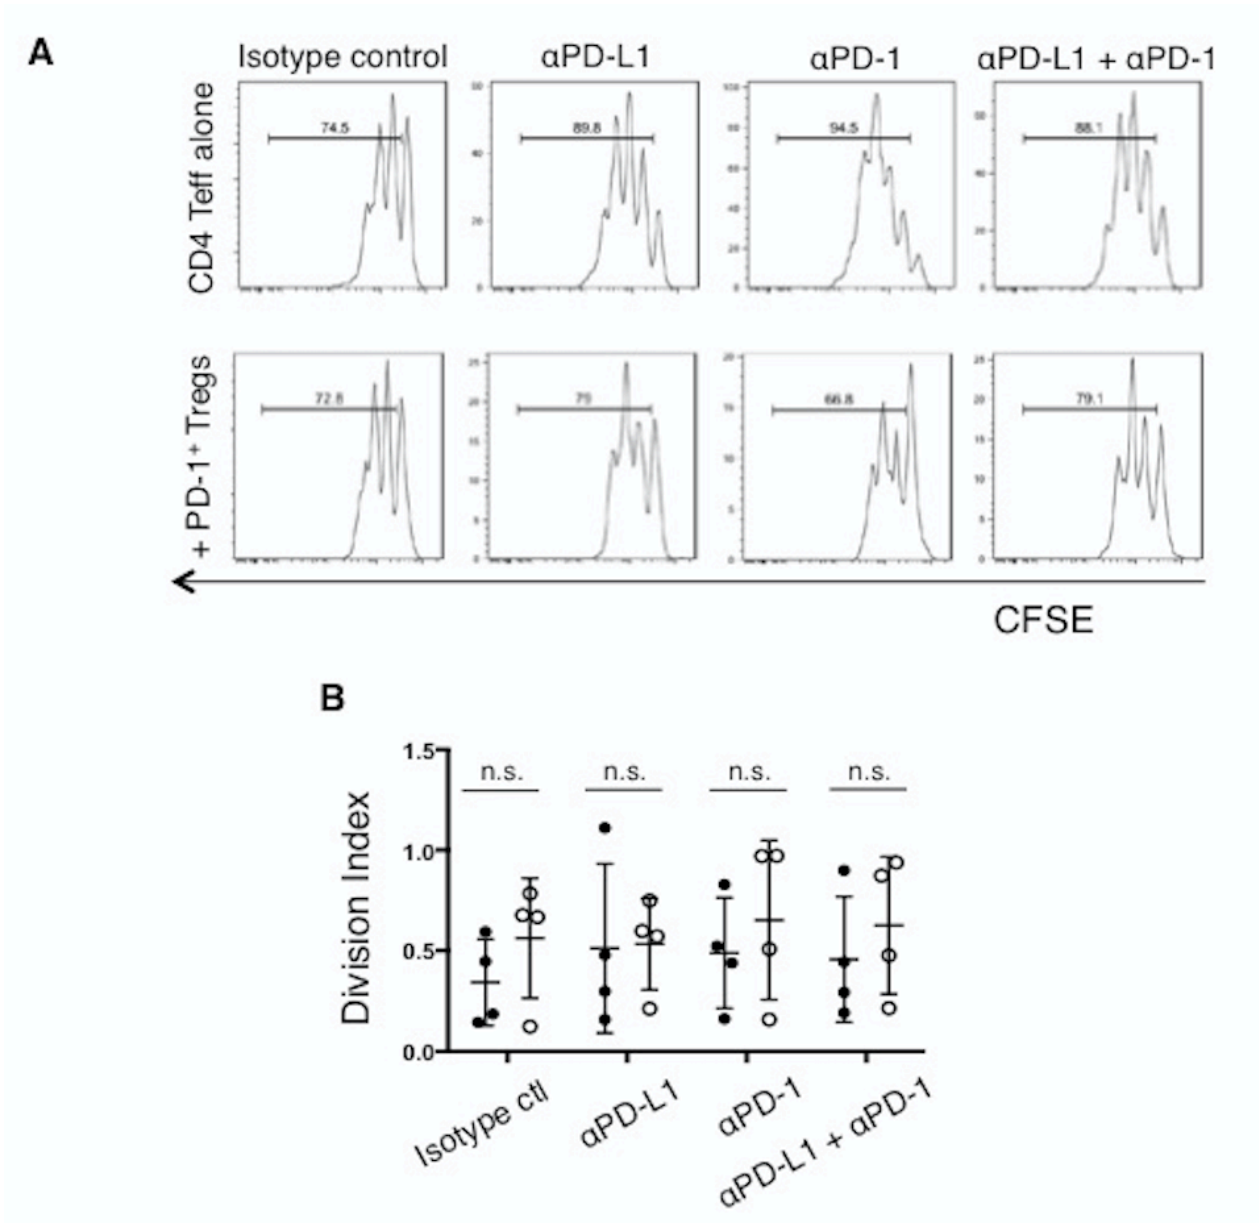

2

3 **Supplementary Figure 4. Blocking the Programmed cell death protein 1 (PD-1)-**  
 4 **Programmed cell death ligand 1 (PD-L1) axis does not restore suppression activity in PD-**  
 5 **1<sup>high</sup> Tregs. a,** Proliferation of T effectors co-cultured with PD-1<sup>high</sup> Tregs (Teff/Treg ratio 1:2) in  
 6 the presence of blocking antibodies for PD-1, PD-L1, or both in combination. Treg and Teff were  
 7 stimulated for 4 days with aCD3/aCD28/aCD2. **b,** Division index of T effectors alone (black  
 8 dots) or co-cultured with PD-1<sup>high</sup> Tregs (white dots) of 4 individuals. Mean + S.D., One-way  
 9 Anova (b) and Two-way ANOVA (c) with Sidak multiple comparison correction.

10

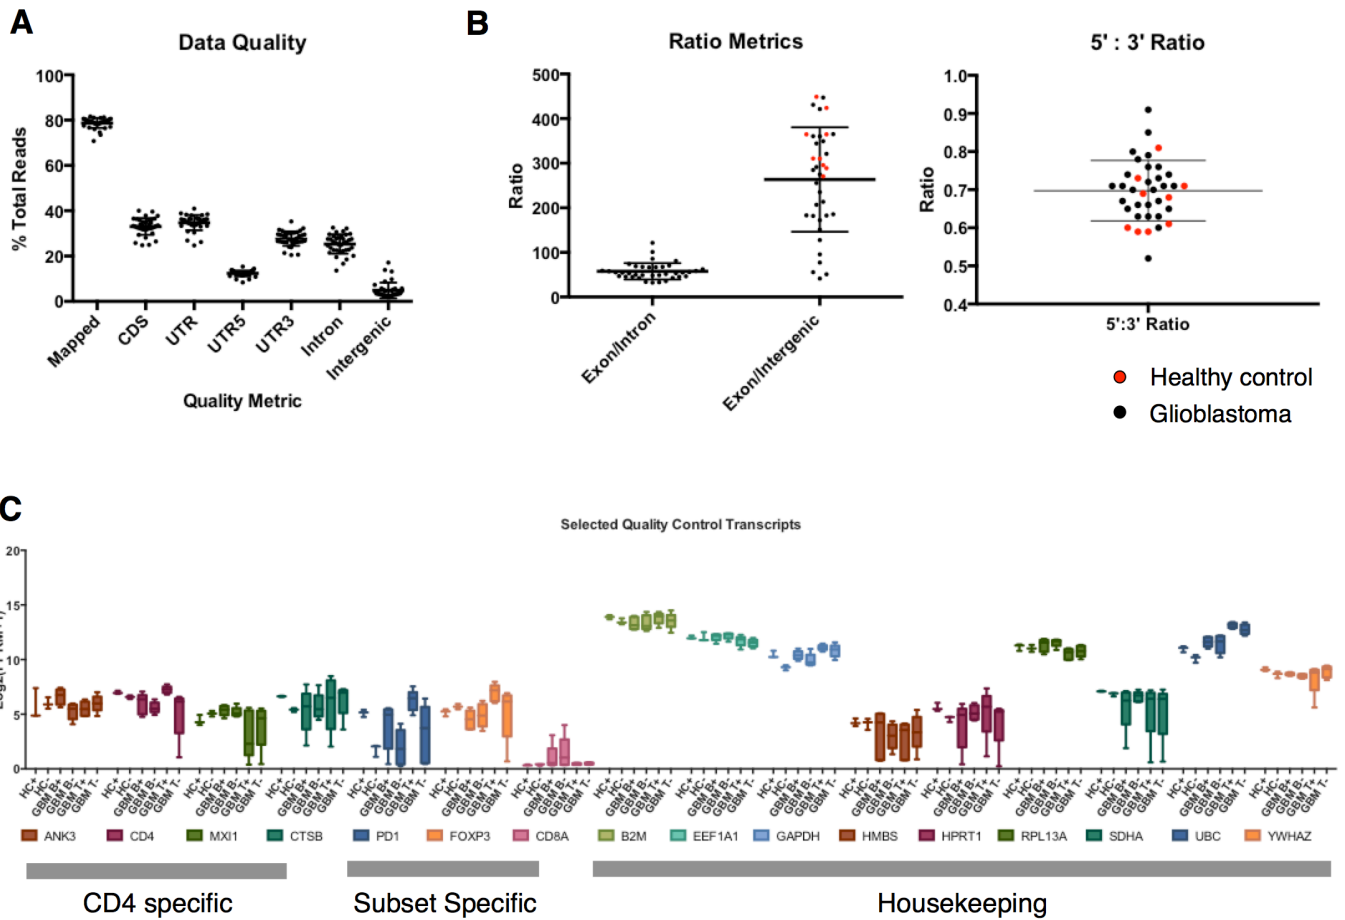

1  
2  
3  
4  
5  
6  
7  
8  
9  
10  
11  
12  
13  
14

**Supplementary Figure 5. Quality control metrics of RNA-sequencing libraries.** **a**, Indicated quality metrics for each library are shown, mean and standard deviation are shown. **b**, Ratio metrics for each library are shown, where healthy control libraries are highlighted in red. Mean and standard deviation are shown. **c**, Boxplots of select transcripts are shown. Bounds of the boxes: 25<sup>th</sup> and 75<sup>th</sup> percentile; line within the box: median; top and bottom whiskers: maximum and minimum values.

1  
2  
3  
4  
5  
6  
7  
8  
9  
10  
11  
12  
13  
14  
15  
16  
17  
18  
19  
20  
21  
22  
23  
24  
25  
26  
27  
28  
29  
30

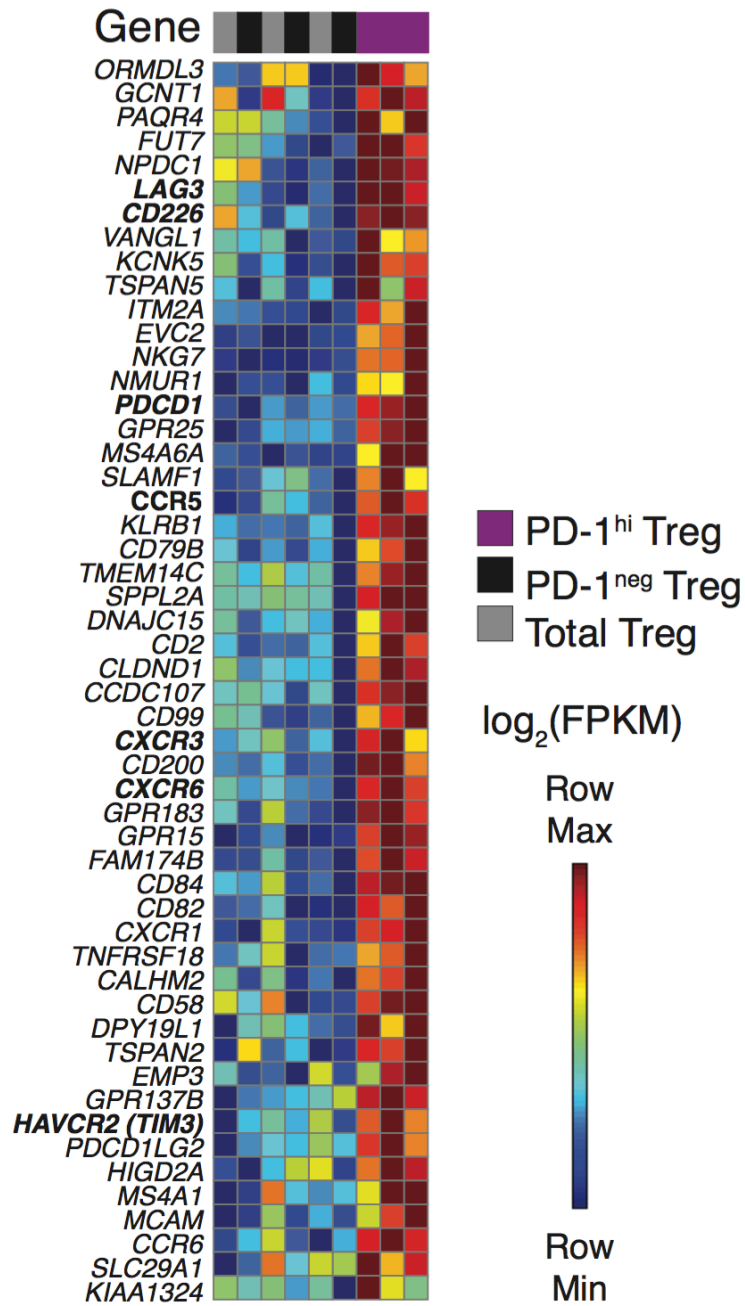

Supplementary Figure 6. Fully annotated heatmap of functional cluster shown in Figure 2B.



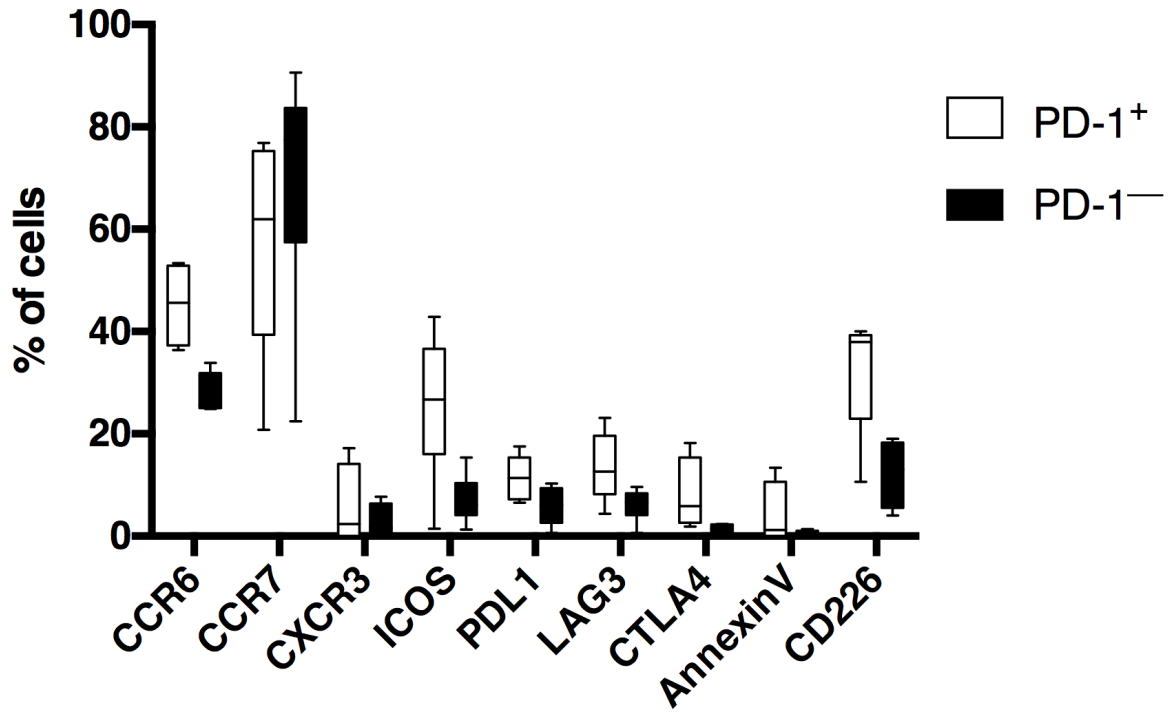

1  
2  
3  
4  
5  
6  
7  
8  
9  
10  
11

**Supplementary Figure 7. Characterization of Programmed cell death protein 1 (PD-1)<sup>high</sup> and PD-1<sup>-</sup> CD4 Treg.** Expression of selected cell markers within PD-1<sup>high</sup> and PD-1<sup>-</sup> Tregs (CD4<sup>+</sup>CD25<sup>+</sup>CD127<sup>-</sup>Foxp3<sup>+</sup>). Bounds of the boxes: 25<sup>th</sup> and 75<sup>th</sup> percentile; line within the box: median; top and bottom whiskers: maximum and minimum values.

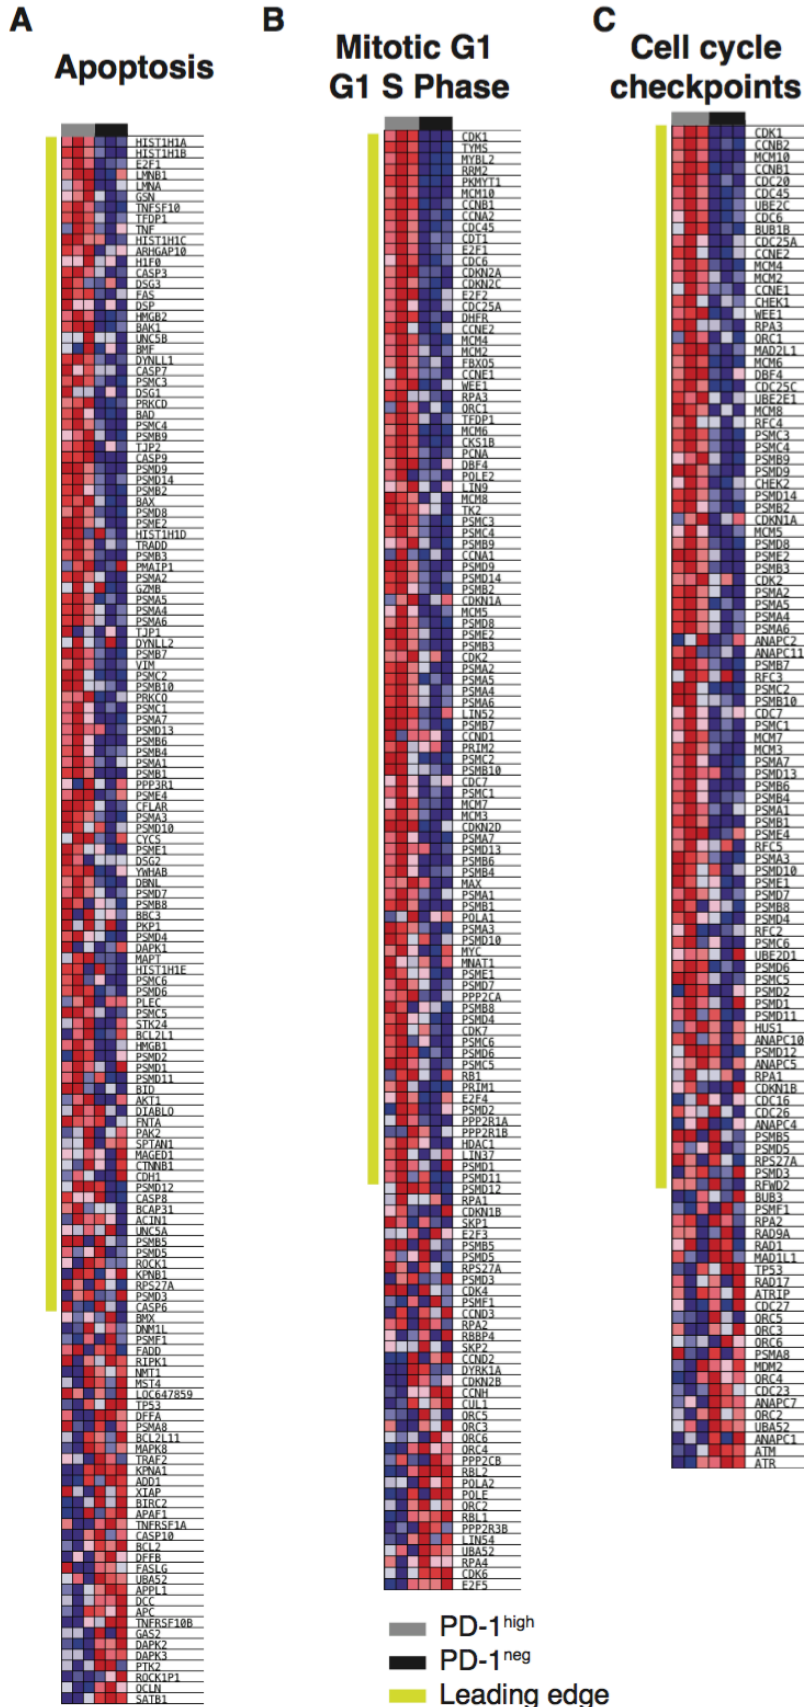

Supplementary Figure 8. Example gene sets enrichment analysis results for healthy control Programmed cell death protein 1 (PD-1)<sup>high</sup> RNA-seq libraries with select genes in leading edge highlighted. **a**, Apoptosis pathway, **b**, Mitotic G1 G1 S Phase, and **c**, Cell cycle checkpoints. Leading edge is highlighted with a yellow bar, PD-1<sup>high</sup> with a grey bar, and PD-1<sup>neg</sup> with a black bar.

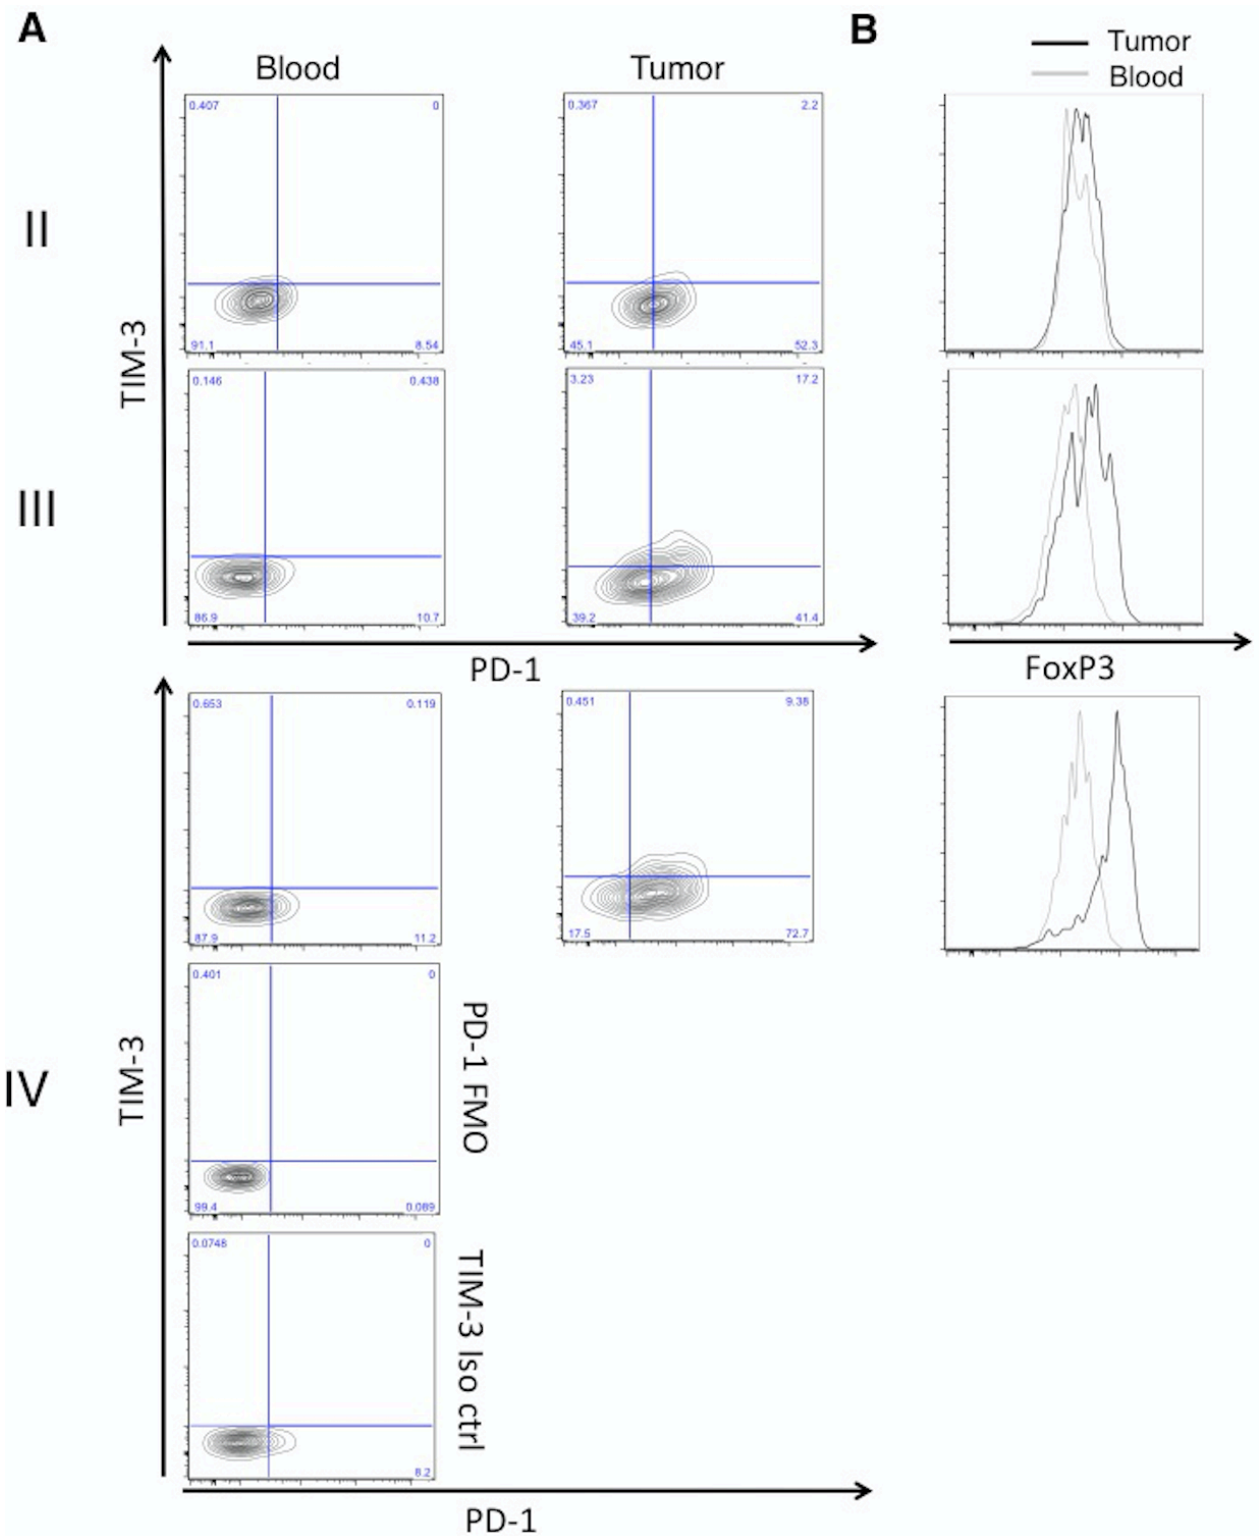

1

2 **Supplementary Figure 9. Representative staining for Programmed cell death protein 1 (PD-**

3 **1) and T-cell immunoglobulin and mucin domain-containing 3 (TIM-3) in the blood and**

1 **tumor infiltrate of patients with different WHO grade gliomas (grade II = G15, grade III =**  
2 **G11 grade IV = G3). a,** Plots are gated on live CD4<sup>+</sup>CD25<sup>hi</sup>CD127<sup>-</sup>FoxP3<sup>+</sup>. **b,** Representative  
3 FoxP3 staining from the same samples. Histograms are gated on live CD4<sup>+</sup>CD25<sup>hi</sup>CD127<sup>-</sup>  
4  
5

1  
2  
3  
4  
5  
6  
7  
8  
9  
10  
11  
12  
13  
14  
15  
16  
17  
18  
19  
20  
21  
22  
23  
24  
25

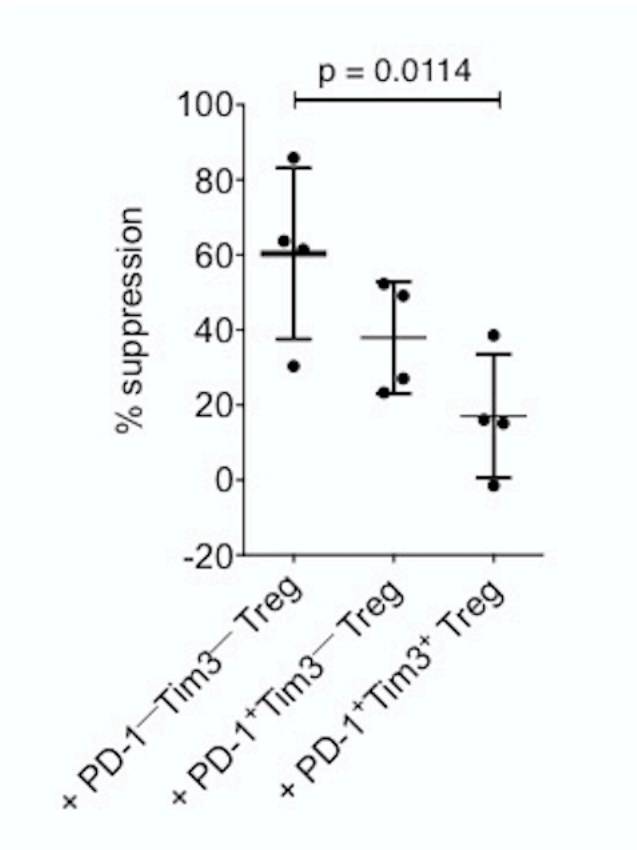

**Supplementary Figure 10. Treg (CD4<sup>+</sup>CD25<sup>+</sup>CD127<sup>-</sup>) populations from peripheral blood of glioblastoma multiforme (GBM) patients co-cultured with CD4 effectors (CD4<sup>+</sup>CD25<sup>-</sup>CD127<sup>+</sup>). Treg and Teff were cultured at a 1:2 ratio (n=4; G37-40). Statistical analyses were performed using paired student's t-test.**

1  
2  
3  
4  
5  
6  
7  
8  
9  
10  
11  
12  
13  
14  
15  
16  
17  
18  
19  
20  
21  
22  
23  
24  
25  
26  
27  
28  
29  
30  
31

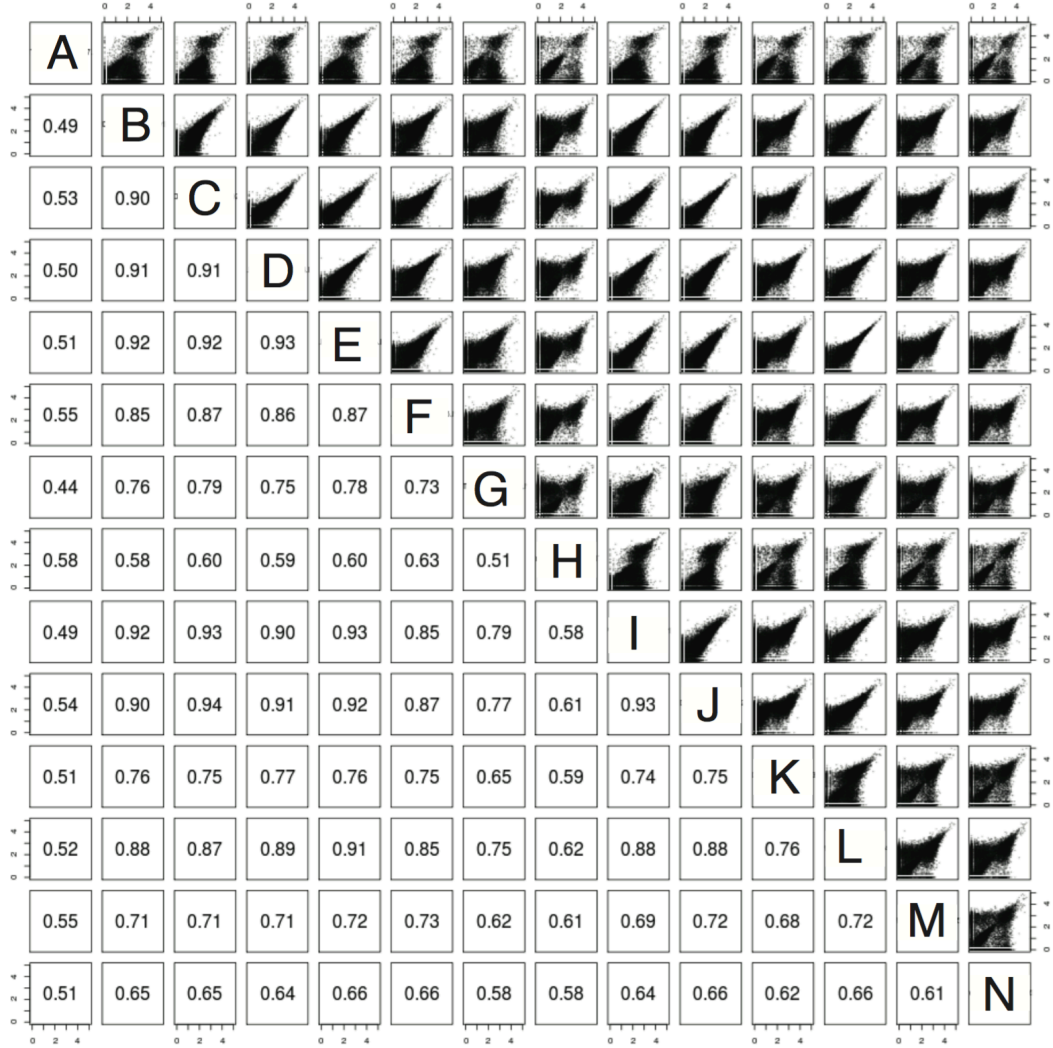

**Supplementary Figure 11. Scatter plot matrix of  $\log_{10}(\text{counts} + 1)$  and Pearson correlation coefficient for each indicated tumor-derived sample. a, BT229 PD-1<sup>-</sup>, b, BT213 PD-1<sup>-</sup>, c, BT215 PD-1<sup>-</sup>, d, BT219 PD-1<sup>-</sup>, e, BT220 PD-1<sup>-</sup>, f, BT223 PD-1<sup>-</sup>, g, BT228 PD-1<sup>-</sup>, h, BT229 PD-1<sup>high</sup>, i, BT213 PD-1<sup>high</sup>, j, BT215 PD-1<sup>high</sup>, k, BT219 PD-1<sup>high</sup>, l, BT220 PD-1<sup>high</sup>, m, BT223 PD-1<sup>high</sup>, n, BT228 PD-1<sup>high</sup>.**

**A**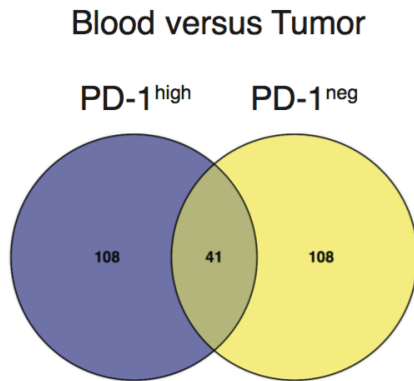**B**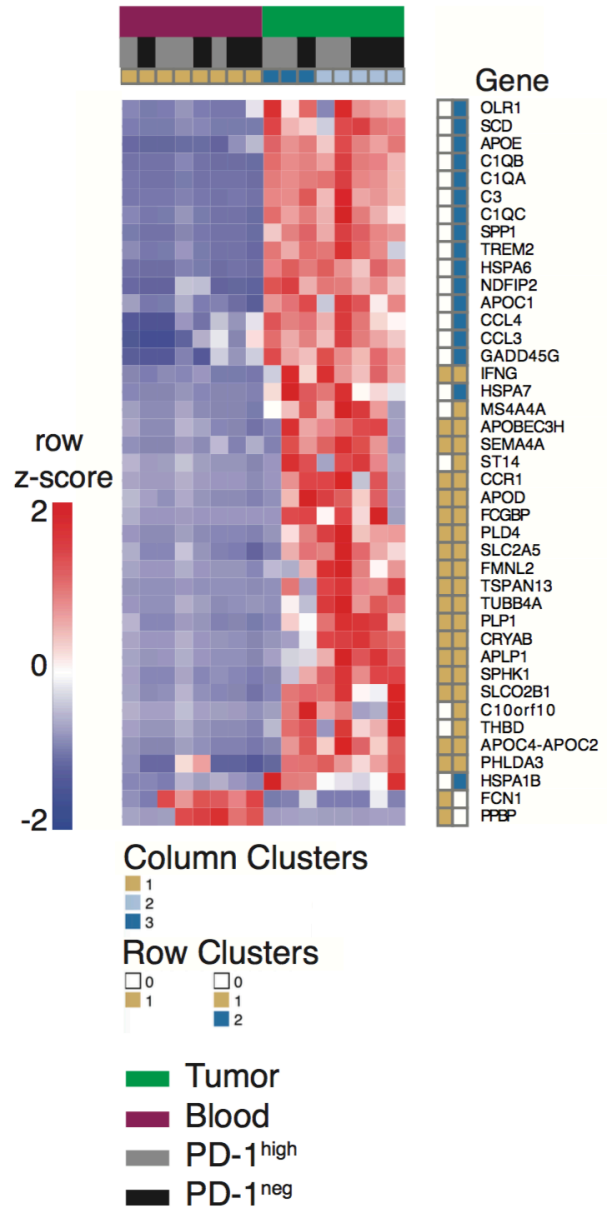

1

2 **Supplementary Figure 12. Differential expression of Programmed cell death protein 1 (PD-**  
 3 **1)<sup>high</sup> or PD-1<sup>-</sup> Tregs within tumor or blood. a,** Venn diagram comparison of differential  
 4 expression of PD-1<sup>high</sup> or PD-1<sup>-</sup> Tregs from tumor as compared to blood. Gene sets were  
 5 filtered based on p-value for top differentially expressed genes and lists were compared. **b,**  
 6 Heatmap of 41 common genes identified. Data was hierarchically clustered and k means clustered  
 7 using GeneE.

8

1

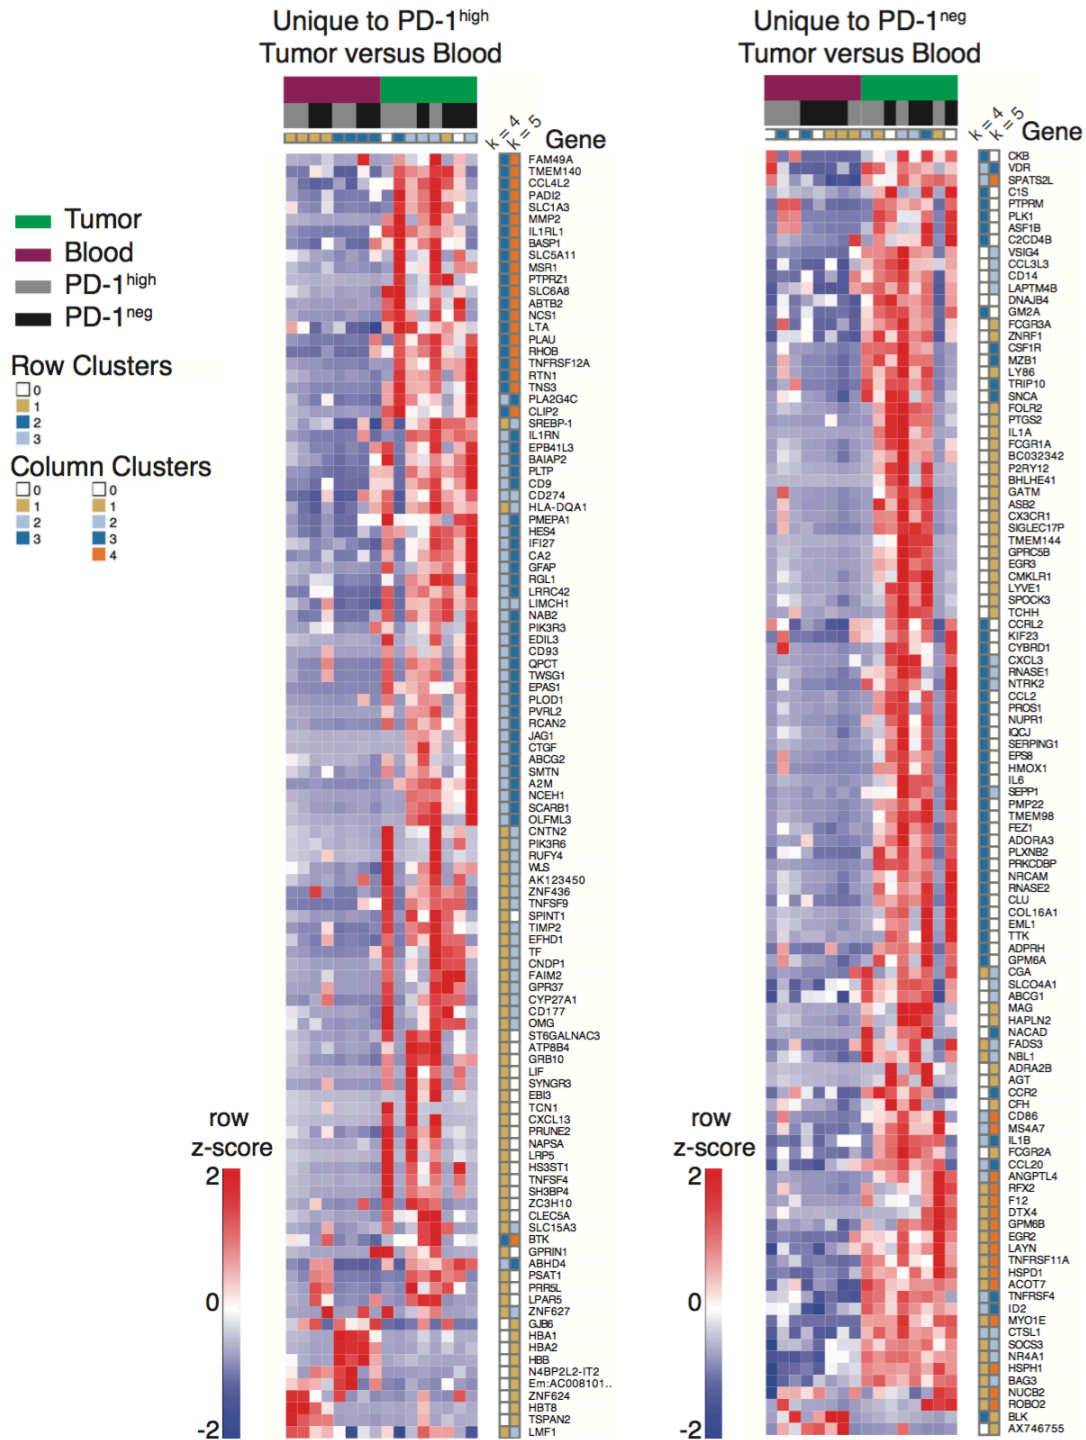

2 **Supplementary Figure 13. Differential expression of Programmed cell death protein 1 (PD-**  
3 **1)<sup>high</sup> or PD-1<sup>neg</sup> Tregs within tumor or blood, unique gene sets are shown as indicated from**  
4 **Supplementary Figure 10a. Data was hierarchically clustered and k means clustered using**  
5 **GeneE.**

6



1  
2  
3

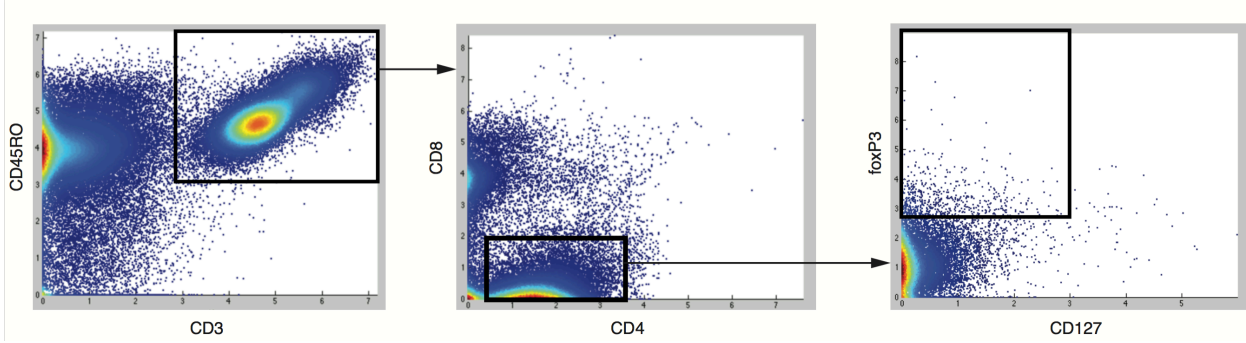

4  
5  
6  
7  
8

**Supplementary Figure 14. Representative gating strategy for Tregs in cytometry by time of flight (CyTOF) data.** Representative of four patients.

1  
2  
3  
4  
5  
6  
7  
8  
9  
10  
11  
12  
13  
14  
15  
16  
17  
18  
19  
20  
21  
22  
23  
24  
25  
26  
27

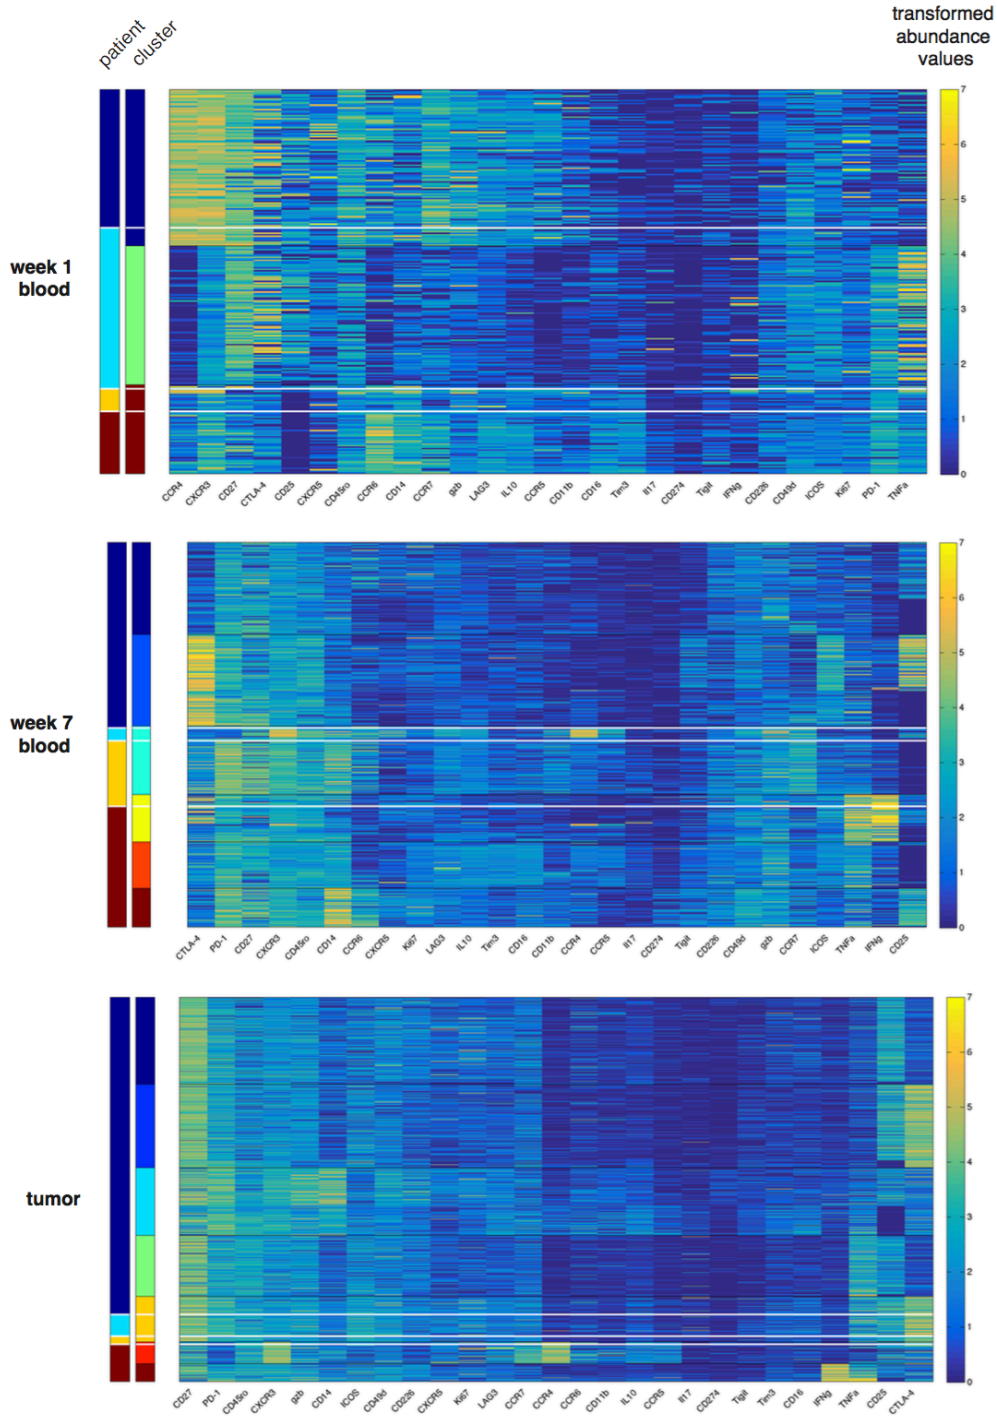

28  
29  
30

**Supplementary Figure 15. Multi-dimensional single-cell Treg data measured by cytometry by time of flight (CyTOF). Tregs were sorted in silico as CD3<sup>+</sup>CD45<sup>+</sup>CD8<sup>-</sup>CD4<sup>+</sup>CD127<sup>+</sup>Foxp3<sup>+</sup>.** Single-cells organized in a nested structure by patient (shown on left

1 colorbar) and louvain clusters (shown on right colorbar). Data for week 1 blood, week 7 blood,  
2 and tumors are shown. Transformed data represents arcsin transformed raw values.  
3

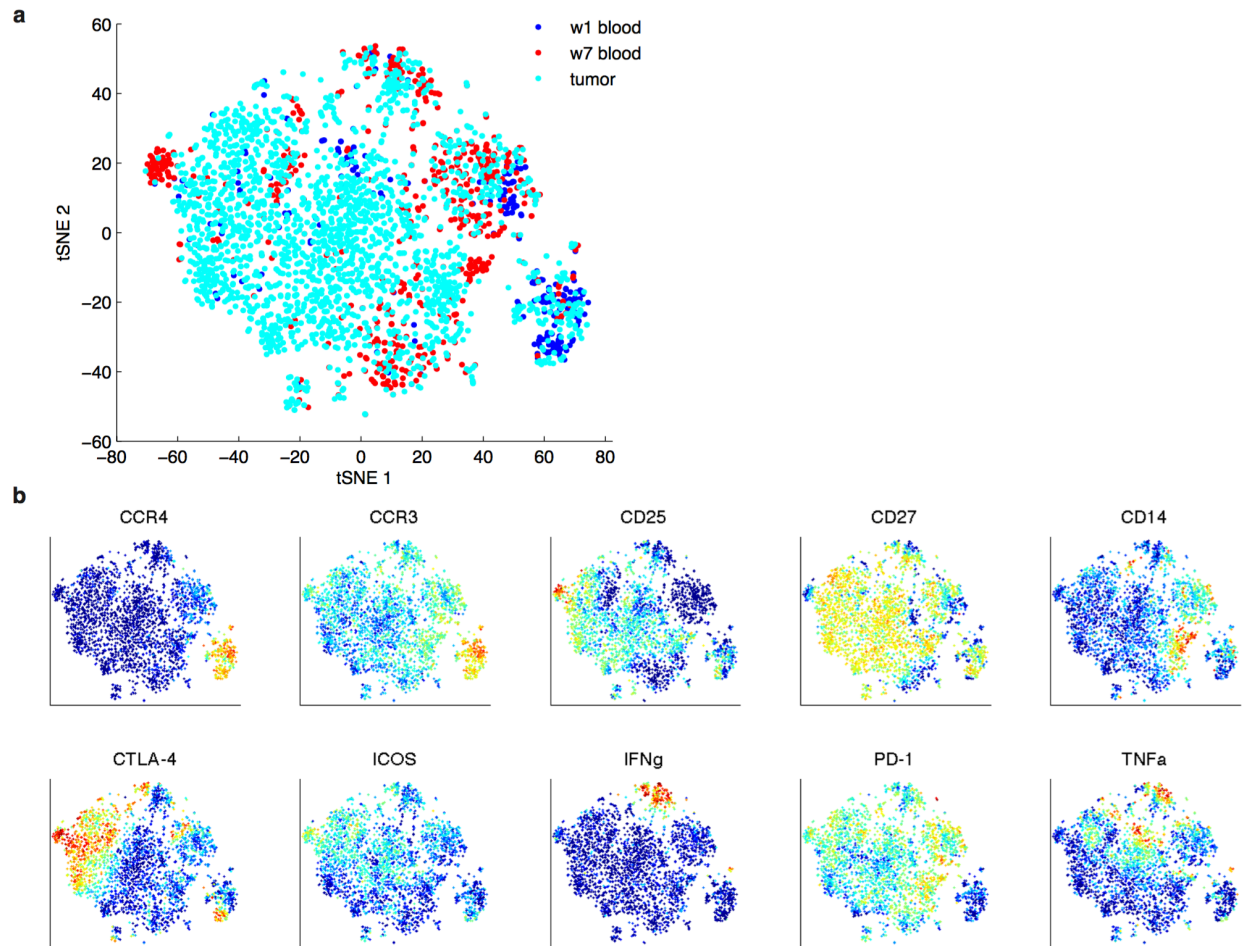

1  
 2 **Supplementary Figure 16. T-distributed stochastic neighbor embedding (tSNE)**  
 3 **representation of cytometry by time of flight (CyTOF) data. a.** Multidimensional tSNE plot  
 4 colored according to week 1 blood, week 7 blood, or tumor. **b.** Same tSNE plots as in a, but  
 5 colored according to protein.

6  
 7  
 8

1  
2  
3  
4  
5  
6  
7  
8  
9  
10  
11  
12  
13  
14  
15  
16  
17  
18  
19  
20  
21  
22  
23  
24  
25  
26  
27  
28  
29  
30  
31

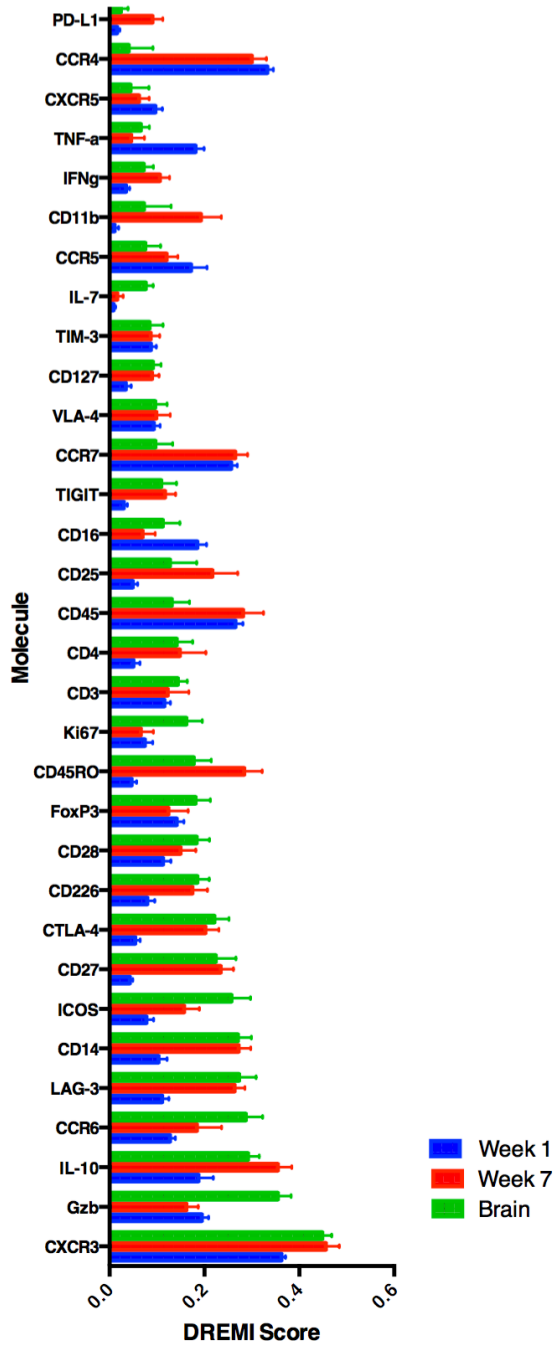

**Supplementary Figure 17. Robustness analysis of conditional-density rescaled estimate of mutual information (DREMI).** DREMI was computed on measured proteins against **Programmed cell death protein 1 (PD-1)** in blood from week 1, blood from week 7 and in the tumor at recurrence, in order to score and compare relationship strength. Here we compute the robustness of the DREMI scores by computing the standard deviation in DREMI scores in 100 trials where 10% of cells were randomly discarded.

1 **Supplementary Table 1**, RNA-sequencing quality control information for all samples.

| Full BT and Subset Sample ID | Number of Cells | Number of reads | Mapped (%) | 5'/3' |
|------------------------------|-----------------|-----------------|------------|-------|
| 213BloodTregPD1pos           | 1512            | 1.24E+07        | 79.42%     | 0.73  |
| 213BloodTregPD1neg           | 5000            | 1.97E+07        | 78.37%     | 0.76  |
| 213TumorTregPD1pos           | 3900            | 1.49E+07        | 78.53%     | 0.63  |
| 213TumorTregPD1neg           | 1043            | 1.70E+07        | 78.89%     | 0.66  |
| 215BloodTregPD1pos           | 1500            | 1.26E+07        | 79.27%     | 0.79  |
| 215TumorTregPD1pos           | 1044            | 1.61E+07        | 80.38%     | 0.63  |
| 215TumorTregPD1neg           | 3617            | 1.35E+07        | 79.39%     | 0.71  |
| 215BloodTregPD1neg           | 5000            | 1.79E+07        | 79.55%     | 0.85  |
| 219TumorTregPD1pos           | 275             | 1.83E+07        | 78.32%     | 0.66  |
| 219TumorTregPD1neg           | 1728            | 1.79E+07        | 79.46%     | 0.65  |
| 219BloodTregPD1pos           | 500             | 1.87E+07        | 80.07%     | 0.74  |
| 219BloodTregPD1neg           | 2000            | 8.15E+05        | 79.21%     | 0.76  |
| 220TumorTregPD1pos           | 700             | 1.43E+07        | 80.63%     | 0.72  |
| 220TumorTregPD1neg           | 2100            | 1.34E+07        | 81.29%     | 0.71  |
| 220BloodTregPD1pos           | 700             | 2.23E+07        | 80.14%     | 0.78  |
| 220BloodTregPD1neg           | 2100            | 2.06E+07        | 79.03%     | 0.80  |
| 223TumorTregPD1pos           | 47              | 1.64E+07        | 74.60%     | 0.67  |
| 223TumorTregPD1neg           | 644             | 1.79E+07        | 77.50%     | 0.70  |
| 223BloodTregPD1pos           | 5000            | 1.61E+07        | 80.06%     | 0.71  |
| 223BloodTregPD1neg           | 185777          | 1.84E+07        | 78.96%     | 0.91  |
| 228BloodTregPD1pos           | 250             | 1.85E+07        | 78.57%     | 0.70  |
| 228BloodTregPD1neg           | 2000            | 3.30E+07        | 76.02%     | 0.71  |
| 228TumorTregPD1pos           | 76              | 1.76E+07        | 76.48%     | 0.65  |
| 228TumorTregPD1neg           | 277             | 1.01E+07        | 78.12%     | 0.52  |
| 229TumorTregPD1pos           | 27              | 2.00E+07        | 73.51%     | 0.67  |
| 229TumorTregPD1neg           | 16              | 1.87E+07        | 70.81%     | 0.74  |
| 229BloodTregPD1pos           | 378             | 1.28E+07        | 79.33%     | 0.60  |
| 229BloodTregPD1neg           | 2000            | 2.14E+07        | 79.09%     | 0.63  |
| 2686BloodTregPD1neg          | 30000           | 2.40E+07        | 81.10%     | 0.73  |
| 2686BloodTregtotal           | 30000           | 2.79E+07        | 80.43%     | 0.81  |
| 2686BloodTregPD1pos          | 20000           | 1.99E+07        | 76.67%     | 0.71  |
| 2687BloodTregtotal           | 30000           | 3.46E+07        | 79.88%     | 0.61  |
| 2687BloodTregPD1pos          | 14663           | 2.01E+07        | 77.08%     | 0.68  |
| 2687BloodTregPD1neg          | 30000           | 2.04E+07        | 80.96%     | 0.69  |

|                     |       |          |        |      |
|---------------------|-------|----------|--------|------|
| 2688BloodTregPD1pos | 20000 | 2.02E+07 | 80.65% | 0.59 |
| 2688BloodTregtotal  | 30000 | 3.59E+07 | 79.55% | 0.59 |
| 2688BloodTregPD1neg | 30000 | 2.56E+07 | 81.61% | 0.60 |

1  
2  
3  
4  
5  
6

1 **Supplementary Table 2**, Differentially expressed genes in Programmed cell death protein 1 (PD-1)<sup>high</sup> and PD-1<sup>low</sup> Tregs from healthy donors.

| Transcript                                                                                                    | Gene Symbol | BloodPD1negTreg_HCvsBloodPD1posTreg_HC_log2fc | BloodPD1negTreg_HCvsBloodPD1posTreg_HC_pvalue | BloodPD1negTreg_HCvsBloodPD1posTreg_HC_log10pval | BloodPD1negTreg_HCvsBloodPD1posTreg_HC_fdr |
|---------------------------------------------------------------------------------------------------------------|-------------|-----------------------------------------------|-----------------------------------------------|--------------------------------------------------|--------------------------------------------|
| uc001qqs.3,uc001qqt.4,uc001qqu.3                                                                              | LAG3        | 3.84                                          | 8.80E-24                                      | 23.06                                            | 1.72E-19                                   |
| uc003jsh.3,uc011cqm.2,uc011cqn.2                                                                              | DEPDC1B     | 5.15                                          | 4.04E-18                                      | 17.39                                            | 3.94E-14                                   |
| uc003jpm.3                                                                                                    | GZMA        | 3.76                                          | 1.29E-17                                      | 16.89                                            | 8.38E-14                                   |
| uc002wcq.4,uc010fzs.3,uc010fzt.3                                                                              | PDCD1       | 4.07                                          | 4.68E-17                                      | 16.33                                            | 1.97E-13                                   |
| uc003cnx.4,uc003cny.1,uc010hiq.3,uc010hir.3                                                                   | KIF15       | 3.83                                          | 5.05E-17                                      | 16.30                                            | 1.97E-13                                   |
| uc002tgc.3,uc002tgd.2,uc010fkb.3,uc010yxh.2                                                                   | BUB1        | 3.09                                          | 4.50E-16                                      | 15.35                                            | 1.46E-12                                   |
| uc001ycb.2,uc001ycc.2,uc001ycd.3,uc001yce.1                                                                   | ASB2        | 4.01                                          | 2.72E-15                                      | 14.57                                            | 7.12E-12                                   |
| uc002qza.3                                                                                                    | ID2         | 2.63                                          | 2.92E-15                                      | 14.53                                            | 7.12E-12                                   |
| uc002ffm.3,uc002ffn.3                                                                                         | MAF         | 2.51                                          | 4.08E-15                                      | 14.39                                            | 8.85E-12                                   |
| uc010unf.1,uc010ung.1,uc021srk.1                                                                              | CTSH        | 3.42                                          | 2.75E-14                                      | 13.56                                            | 5.37E-11                                   |
| uc001dhm.2,uc001dhn.3,uc001dho.3                                                                              | AK5         | -3.18                                         | 3.17E-14                                      | 13.50                                            | 5.62E-11                                   |
| uc003tff.3,uc003tfg.3,uc010kxe.3,uc011kaz.2                                                                   | ANLN        | 4.89                                          | 1.38E-13                                      | 12.86                                            | 2.24E-10                                   |
| uc002bul.3,uc010bon.3,uc010boo.1,uc010urq.2,uc010urr.1,uc021sxi.1                                             | IGF1R       | -3.39                                         | 2.01E-13                                      | 12.70                                            | 3.01E-10                                   |
| uc002wvp.1,uc010gdv.1                                                                                         | TPX2        | 4.44                                          | 2.62E-13                                      | 12.58                                            | 3.65E-10                                   |
| uc004eqd.3,uc004eqe.3,uc010nqf.3,uc010nqg.3,uc011mtf.2,uc011mtg.2,uc011mth.2,uc011mti.2,uc011mtj.2,uc011mtl.2 | PLS3        | 4.82                                          | 7.16E-13                                      | 12.15                                            | 9.32E-10                                   |
| uc001gtu.3,uc001gtv.3,uc001gtw.4                                                                              | ASPM        | 4.17                                          | 2.57E-12                                      | 11.59                                            | 3.14E-09                                   |
| uc004eun.4,uc004eup.4,uc011muk.1,uc011mul.1                                                                   | SMARCA1     | -6.98                                         | 3.57E-12                                      | 11.45                                            | 4.10E-09                                   |
| uc003jvm.3,uc010ixb.3,uc031sjm.1                                                                              | CCNB1       | 4.65                                          | 4.27E-12                                      | 11.37                                            | 4.47E-09                                   |
| uc001unt.3,uc001unu.3,uc001unv.3                                                                              | SKA3        | 4.35                                          | 4.35E-12                                      | 11.36                                            | 4.47E-09                                   |
| uc010dka.1,uc010dkb.1,uc010dkc.1                                                                              | TYMS        | 6.30                                          | 4.72E-12                                      | 11.33                                            | 4.60E-09                                   |
| uc002oay.3,uc002oaz.3                                                                                         | ZBTB32      | 2.88                                          | 7.68E-12                                      | 11.11                                            | 7.14E-09                                   |
| uc002iup.2                                                                                                    | NOG         | -3.67                                         | 8.45E-12                                      | 11.07                                            | 7.49E-09                                   |
| uc002hrq.2,uc002hrh.2,uc002hri.2,uc002hrj.1,uc002hrk.1,uc010cvt.1                                             | PLXDC1      | -2.56                                         | 9.28E-12                                      | 11.03                                            | 7.88E-09                                   |
| uc010sgt.2                                                                                                    | KLRB1       | 3.85                                          | 1.02E-11                                      | 10.99                                            | 8.32E-09                                   |
| uc002teg.3,uc002teh.3,uc002tei.3,uc002tej.3,uc002tek.4,uc002tel.3                                             | LIMS1       | 2.01                                          | 1.48E-11                                      | 10.83                                            | 1.15E-08                                   |
| uc002hus.3                                                                                                    | IGFBP4      | 5.11                                          | 1.54E-11                                      | 10.81                                            | 1.15E-08                                   |
| uc001uvd.3,uc010abi.3,uc010tee.1,uc010tef.2,uc010teg.1,uc021ric.1,uc021rid.1                                  | NBEA        | -3.77                                         | 2.60E-11                                      | 10.59                                            | 1.88E-08                                   |
| uc003iut.2,uc010irs.3                                                                                         | NEIL3       | 4.10                                          | 4.73E-11                                      | 10.33                                            | 3.30E-08                                   |
| uc001hiz.4,uc009xdc.3,uc010ptb.2                                                                              | DTL         | 5.19                                          | 6.73E-11                                      | 10.17                                            | 4.53E-08                                   |
| uc002jor.1,uc002jos.4,uc010dgi.1                                                                              | MYO15B      | -2.25                                         | 7.69E-11                                      | 10.11                                            | 4.90E-08                                   |



|                                                                                                                                                                                                                  |           |       |          |       |          |
|------------------------------------------------------------------------------------------------------------------------------------------------------------------------------------------------------------------|-----------|-------|----------|-------|----------|
| uc001tnj.4,uc009zva.4,uc010sxf.3,uc031qjk.1                                                                                                                                                                      | CORO1C    | 2.79  | 7.78E-11 | 10.11 | 4.90E-08 |
| uc001dxx.4,uc021org.1                                                                                                                                                                                            | AMIGO1    | -2.37 | 1.26E-10 | 9.90  | 7.66E-08 |
| uc003sua.1,uc003sub.4,uc003sud.2,uc003sue.3,uc003suf.2,uc003suh.3,uc003sui.3,uc003suj.3,uc003suk.3,uc010kud.2,uc010kue.1,uc011jya.2,uc011jyb.2,uc011jyc.2,uc011jyd.2,uc011jye.2,uc011jyf.2                       | HDAC9     | 2.87  | 1.42E-10 | 9.85  | 8.39E-08 |
| uc001tjl.3                                                                                                                                                                                                       | PMCH      | 5.60  | 1.53E-10 | 9.81  | 8.81E-08 |
| uc003qbw.4,uc003qbx.4,uc003qby.4,uc003qbz.1,uc010kfg.2,uc031spp.1                                                                                                                                                | SAMD3     | 2.15  | 1.99E-10 | 9.70  | 1.11E-07 |
| uc002huq.3,uc002hur.1                                                                                                                                                                                            | TOP2A     | 5.23  | 2.10E-10 | 9.68  | 1.14E-07 |
| uc001rvs.2,uc001rvt.2,uc001rvu.2,uc009zlm.1                                                                                                                                                                      | RACGAP1   | 2.49  | 2.22E-10 | 9.65  | 1.17E-07 |
| uc003tfa.3                                                                                                                                                                                                       | EEPDI     | 2.78  | 2.46E-10 | 9.61  | 1.26E-07 |
| uc003int.3,uc003inu.1                                                                                                                                                                                            | RNF175    | -4.33 | 2.95E-10 | 9.53  | 1.48E-07 |
| uc002csm.3,uc002csn.3,uc002cso.3,uc002csq.3,uc010bsy.1,uc010uwn.2                                                                                                                                                | PKMYT1    | 4.91  | 3.70E-10 | 9.43  | 1.81E-07 |
| uc003lzf.3,uc003lzg.3,uc003lzh.3,uc011dem.2                                                                                                                                                                      | HMMR      | 6.34  | 3.96E-10 | 9.40  | 1.88E-07 |
| uc001lke.3,uc001lkf.3,uc009yav.1,uc009yaw.1                                                                                                                                                                      | MKI67     | 4.50  | 4.67E-10 | 9.33  | 2.17E-07 |
| uc002agk.3,uc002agl.3,uc002agm.3,uc002agn.3,uc010bgj.3,uc010uhd.2,uc021snc.1                                                                                                                                     | ANXA2     | 2.19  | 5.59E-10 | 9.25  | 2.54E-07 |
| uc003hxb.1,uc003hxc.1,uc003hxd.1                                                                                                                                                                                 | CENPE     | 3.09  | 7.80E-10 | 9.11  | 3.46E-07 |
| uc002msy.1,uc002msz.1                                                                                                                                                                                            | ZNF433    | -3.48 | 8.96E-10 | 9.05  | 3.89E-07 |
| uc002kvs.4,uc002kvt.4,uc002kvu.4                                                                                                                                                                                 | TAF4B     | -2.22 | 9.20E-10 | 9.04  | 3.90E-07 |
| uc001jld.3,uc001jle.3,uc001jlg.3,uc010qii.2,uc021prh.1,uc031pvg.1                                                                                                                                                | CDK1      | 6.23  | 1.01E-09 | 8.99  | 4.21E-07 |
| uc002bsl.4,uc010boe.3                                                                                                                                                                                            | FAM174B   | 2.35  | 1.09E-09 | 8.96  | 4.35E-07 |
| uc003cbh.3,uc003cbi.3,uc003cbj.3                                                                                                                                                                                 | SATB1     | -1.81 | 1.11E-09 | 8.95  | 4.35E-07 |
| uc002teq.4,uc010fjn.3,uc010yws.2                                                                                                                                                                                 | EDAR      | -2.29 | 1.12E-09 | 8.95  | 4.35E-07 |
| uc003yrx.3,uc010mdn.3,uc011lis.2,uc022bay.1                                                                                                                                                                      | TRIB1     | 1.98  | 1.14E-09 | 8.94  | 4.35E-07 |
| uc001gvn.2                                                                                                                                                                                                       | GPR25     | 2.45  | 1.16E-09 | 8.94  | 4.35E-07 |
| uc002bnm.1,uc002bnn.1,uc002bno.3,uc002bnp.1,uc002bnq.1,uc010bnp.1                                                                                                                                                | FANCI     | 2.04  | 1.18E-09 | 8.93  | 4.36E-07 |
| uc003tir.3,uc010kxv.3                                                                                                                                                                                            | BLVRA     | 2.14  | 1.53E-09 | 8.82  | 5.51E-07 |
| uc003ken.4                                                                                                                                                                                                       | F2R       | 3.27  | 1.63E-09 | 8.79  | 5.78E-07 |
| uc001lfg.4,uc001lfk.1,uc001lfn.5,uc001lfo.1,uc010qtl.2,uc010qtm.2,uc010qtn.2,uc010qto.2,uc010qtp.2,uc010qtq.2,uc021pzv.1,uc021pzw.1,uc021pzx.1,uc021pzy.1,uc021pzz.1,uc021qaa.1,uc021qab.1,uc021qac.1,uc031pxk.1 | FGFR2     | 3.75  | 2.37E-09 | 8.62  | 8.27E-07 |
| uc001dku.4,uc009wcm.3                                                                                                                                                                                            | SYDE2     | -2.66 | 3.42E-09 | 8.47  | 1.17E-06 |
| uc003wda.4                                                                                                                                                                                                       | EPHA1-AS1 | -2.60 | 3.52E-09 | 8.45  | 1.18E-06 |
| uc002fid.3                                                                                                                                                                                                       | COTL1     | 1.73  | 3.71E-09 | 8.43  | 1.23E-06 |
| uc002iou.4,uc002iov.4,uc002iow.3                                                                                                                                                                                 | ZNF652    | -1.75 | 3.86E-09 | 8.41  | 1.26E-06 |
| uc001mhk.3,uc001mhl.3,uc010rbw.2,uc010rbx.2                                                                                                                                                                      | DENND5A   | -1.89 | 3.94E-09 | 8.40  | 1.26E-06 |
| uc001zck.3,uc001zcl.3,uc001zcm.1,uc010azj.2,uc010uas.1,uc010uat.2                                                                                                                                                | APBA2     | -2.63 | 5.50E-09 | 8.26  | 1.72E-06 |

|                                                                                                                          |           |        |          |      |          |
|--------------------------------------------------------------------------------------------------------------------------|-----------|--------|----------|------|----------|
| uc002kli.3                                                                                                               | NDC80     | 2.20   | 5.56E-09 | 8.26 | 1.72E-06 |
| uc004eji.4,uc004ejj.4,uc010nod.3,uc022ebc.1,uc022ebd.1                                                                   | GPRASP1   | -1.84  | 5.91E-09 | 8.23 | 1.75E-06 |
| uc010ywt.1                                                                                                               | SH3RF3    | -2.76  | 5.92E-09 | 8.23 | 1.75E-06 |
| uc010gce.1                                                                                                               | ISM1      | -3.16  | 5.93E-09 | 8.23 | 1.75E-06 |
| uc002mbo.3,uc002mbp.3,uc010duf.3,uc010xik.2                                                                              | UHRF1     | 5.90   | 6.05E-09 | 8.22 | 1.76E-06 |
| uc003alz.3,uc003ama.3,uc010gwm.3                                                                                         | YWHAH     | 1.74   | 6.63E-09 | 8.18 | 1.90E-06 |
| uc003cpo.4,uc010hjd.3,uc021wxb.1                                                                                         | CCR5      | 2.97   | 7.61E-09 | 8.12 | 2.15E-06 |
| uc003cdx.4,uc003cdy.4,uc010hfn.3,uc011axc.2                                                                              | EOMES     | 15.00  | 8.07E-09 | 8.09 | 2.25E-06 |
| uc003wcz.3                                                                                                               | EPHA1     | -2.60  | 8.19E-09 | 8.09 | 2.25E-06 |
| uc001tlh.4,uc031qji.1                                                                                                    | C12orf75  | 1.82   | 9.21E-09 | 8.04 | 2.50E-06 |
| uc003xep.1,uc003xeq.1,uc003xer.1,uc011lae.1                                                                              | CDCA2     | 4.46   | 9.52E-09 | 8.02 | 2.55E-06 |
| uc001ocp.2                                                                                                               | CDCA5     | 4.84   | 1.10E-08 | 7.96 | 2.91E-06 |
| uc003cpc.1,uc010hix.1,uc021www.1                                                                                         | CXCR6     | 3.20   | 1.15E-08 | 7.94 | 2.91E-06 |
| uc003pnw.3,uc010keh.3,uc011eab.2                                                                                         | BACH2     | -1.86  | 1.15E-08 | 7.94 | 2.91E-06 |
| uc001wrq.3,uc010aml.3                                                                                                    | AKAP6     | -15.00 | 1.15E-08 | 7.94 | 2.91E-06 |
| uc021uec.1                                                                                                               | EPR-1     | 5.80   | 1.17E-08 | 7.93 | 2.91E-06 |
| uc003xsq.4,uc003xsr.4,uc010lyi.3,uc010lyj.3,uc022aur.1                                                                   | PLAG1     | -2.46  | 1.18E-08 | 7.93 | 2.91E-06 |
| uc001scj.2,uc001sek.2,uc010soe.1                                                                                         | ESPL1     | 7.35   | 1.44E-08 | 7.84 | 3.52E-06 |
| uc010ppj.1,uc010ppk.1                                                                                                    | KIF14     | 4.27   | 1.51E-08 | 7.82 | 3.63E-06 |
| uc002ktw.3,uc002ktx.1,uc002kty.3,uc002ktz.3,uc002kua.3,uc010xap.2,uc021uid.1                                             | RBBP8     | 2.19   | 1.58E-08 | 7.80 | 3.76E-06 |
| uc001zoa.3,uc001zob.3,uc010bcg.2,uc010ucx.1                                                                              | LTK       | 4.41   | 1.79E-08 | 7.75 | 4.22E-06 |
| uc003zzn.4,uc010mll.4,uc010mlm.4,uc011lpm.3,uc011lpn.3,uc011lpo.3,uc011lpp.3,uc011lpq.3,uc011lpr.3,uc011lps.3,uc022bgq.2 | MELK      | 4.27   | 1.90E-08 | 7.72 | 4.42E-06 |
| uc003gzm.4,uc003gzn.3,uc011bzf.2,uc011bzs.2                                                                              | USP46     | 2.17   | 2.03E-08 | 7.69 | 4.67E-06 |
| uc001ezg.3,uc001ezh.3,uc010pdo.2,uc010pdp.2                                                                              | RORC      | 2.97   | 2.21E-08 | 7.65 | 5.02E-06 |
| uc001rdb.3,uc009zif.3,uc009zig.3,uc010shv.2                                                                              | EPS8      | -5.00  | 3.27E-08 | 7.49 | 7.33E-06 |
| uc002jnz.1,uc002jna.1,uc002jnb.1                                                                                         | HN1       | 2.06   | 3.36E-08 | 7.47 | 7.46E-06 |
| uc002jef.2                                                                                                               | PECAM1    | -2.77  | 4.05E-08 | 7.39 | 8.88E-06 |
| uc003idu.4,uc003idv.4                                                                                                    | ANXA5     | 1.63   | 4.25E-08 | 7.37 | 9.23E-06 |
| uc003ybd.3                                                                                                               | ZC2HC1A   | 1.80   | 4.71E-08 | 7.33 | 1.01E-05 |
| uc003dly.2                                                                                                               | PSMD6-AS2 | -1.87  | 5.29E-08 | 7.28 | 1.12E-05 |
| uc002ebq.3,uc002ebr.3,uc002ebs.1,uc010cam.1,uc010can.3,uc010vfj.1                                                        | ITGAM     | 2.42   | 6.43E-08 | 7.19 | 1.35E-05 |
| uc001egm.3,uc001egn.3,uc001ego.1,uc001egp.4,uc010owy.2                                                                   | CD58      | 1.68   | 6.87E-08 | 7.16 | 1.43E-05 |
| uc004cyb.3,uc004cyc.3,uc004cyd.3,uc004cye.3                                                                              | SCML1     | -2.50  | 7.06E-08 | 7.15 | 1.45E-05 |
| uc001myc.3,uc001myd.3                                                                                                    | CD82      | 1.63   | 7.82E-08 | 7.11 | 1.59E-05 |
| uc002mkg.3,uc010xkf.2                                                                                                    | MYO1F     | 1.60   | 7.96E-08 | 7.10 | 1.60E-05 |
| uc002asb.3,uc002asc.3,uc010bih.2,uc010bii.3,uc010ukc.2                                                                   | KIF23     | 4.67   | 8.78E-08 | 7.06 | 1.75E-05 |
| uc003jqp.3,uc003jqj.3,uc003jqr.3,uc010iwb.3,uc010i                                                                       | IL6ST     | -2.10  | 1.00E-07 | 7.00 | 1.96E-05 |

|                                                                                                                                                |           |       |          |      |          |
|------------------------------------------------------------------------------------------------------------------------------------------------|-----------|-------|----------|------|----------|
| wd.3,uc010iwe.1,uc010iwf.1,uc011cck.2                                                                                                          |           |       |          |      |          |
| uc002qvn.1,uc010evy.1                                                                                                                          | FAM72D    | 4.76  | 1.00E-07 | 7.00 | 1.96E-05 |
| uc001bhe.2                                                                                                                                     | E2F2      | 2.20  | 1.02E-07 | 6.99 | 1.98E-05 |
| uc001joz.3,uc001jpa.1,uc021prx.1                                                                                                               | SRGN      | 1.62  | 1.05E-07 | 6.98 | 2.02E-05 |
| uc003ccg.2,uc010hfc.2                                                                                                                          | UBE2E2    | -3.34 | 1.16E-07 | 6.93 | 2.19E-05 |
| uc003ont.3                                                                                                                                     | CCDC167   | 1.76  | 1.17E-07 | 6.93 | 2.19E-05 |
| uc002ggi.4,uc002ggj.4,uc010cmf.3                                                                                                               | TNK1      | -1.82 | 1.27E-07 | 6.90 | 2.37E-05 |
| uc002orh.1,uc010xwd.1                                                                                                                          | CEACAM4   | -3.24 | 1.51E-07 | 6.82 | 2.77E-05 |
| uc003ink.2,uc021xtj.1,uc021xtk.1                                                                                                               | MND1      | 4.62  | 1.66E-07 | 6.78 | 3.00E-05 |
| uc001iks.1,uc001ikt.3,uc001iku.3                                                                                                               | USP6NL    | -2.22 | 1.66E-07 | 6.78 | 3.00E-05 |
| uc002lkm.4,uc010dqq.3,uc021uli.1                                                                                                               | CD226     | 1.91  | 1.78E-07 | 6.75 | 3.18E-05 |
| uc002uhq.1,uc002uhs.3,uc010zdz.1,uc010zea.1,uc010zeb.2                                                                                         | PDK1      | -1.58 | 1.84E-07 | 6.73 | 3.27E-05 |
| uc004bgf.1,uc011lwx.1                                                                                                                          | KIAA1958  | -4.10 | 1.87E-07 | 6.73 | 3.28E-05 |
| uc003ike.3,uc003ikd.3,uc003ikf.3,uc010iov.3,uc011eic.2                                                                                         | SMAD1     | 3.59  | 1.89E-07 | 6.72 | 3.29E-05 |
| uc002fdk.3,uc002fdl.1,uc010cgr.1,uc010vmz.1                                                                                                    | ZNRF1     | 2.91  | 2.01E-07 | 6.70 | 3.45E-05 |
| uc003xqk.2,uc003xql.2,uc010lxw.2,uc011ldi.2                                                                                                    | MCM4      | 1.92  | 2.01E-07 | 6.70 | 3.45E-05 |
| uc001fmg.3,uc010pgq.2                                                                                                                          | SYT11     | 1.88  | 2.23E-07 | 6.65 | 3.75E-05 |
| uc003cen.3,uc003ceo.3,uc021wut.1                                                                                                               | TGFBR2    | -1.50 | 2.23E-07 | 6.65 | 3.75E-05 |
| uc022cew.1,uc022cex.1                                                                                                                          | LINC00892 | 3.16  | 2.25E-07 | 6.65 | 3.75E-05 |
| uc003xgg.3,uc003xgh.3,uc010luy.1                                                                                                               | ESCO2     | 4.22  | 2.31E-07 | 6.64 | 3.81E-05 |
| uc001fyz.1,uc001fza.1                                                                                                                          | FCER1G    | -2.84 | 2.34E-07 | 6.63 | 3.84E-05 |
| uc001dqz.4,uc010otv.2,uc010otx.2                                                                                                               | CNN3      | -3.02 | 2.42E-07 | 6.62 | 3.94E-05 |
| uc001uvm.3,uc001uvm.3,uc001uvo.3,uc001uyp.2,uc001uvq.3,uc010ten.2                                                                              | SPG20     | -1.63 | 2.57E-07 | 6.59 | 4.12E-05 |
| uc002taf.3,uc002tag.3,uc002tah.1,uc010fiq.1,uc010fir.1,uc010yvr.1                                                                              | AFF3      | -2.05 | 2.57E-07 | 6.59 | 4.12E-05 |
| uc002wlp.3,uc002wlq.3,uc010zqs.1                                                                                                               | PCNA      | 1.62  | 2.65E-07 | 6.58 | 4.20E-05 |
| uc003gpp.4,uc011bxj.3                                                                                                                          | NCAPG     | 6.57  | 2.87E-07 | 6.54 | 4.52E-05 |
| uc003gol.1,uc021xmk.1                                                                                                                          | CD38      | 2.69  | 2.90E-07 | 6.54 | 4.52E-05 |
| uc003dyw.3,uc003dyx.3,uc003dyy.3,uc003dyz.3,uc010hq.1                                                                                          | CD200     | 2.48  | 2.95E-07 | 6.53 | 4.57E-05 |
| uc002qys.3,uc002qyu.3                                                                                                                          | RNF144A   | -1.78 | 3.21E-07 | 6.49 | 4.93E-05 |
| uc004ajf.1,uc004ajg.1,uc031tee.1                                                                                                               | ANXA1     | 1.96  | 3.61E-07 | 6.44 | 5.49E-05 |
| uc001nnl.3,uc001nmm.3,uc010rko.2,uc021qjn.1                                                                                                    | FAM111B   | 2.71  | 3.64E-07 | 6.44 | 5.49E-05 |
| uc003vog.3,uc003voh.3,uc003voi.3,uc003voj.4,uc003vok.2,uc010lir.1,uc010lls.1,uc010llt.3,uc010llu.1,uc010llv.1,uc010llw.1,uc011kot.1,uc011kou.1 | IRF5      | 1.78  | 3.66E-07 | 6.44 | 5.49E-05 |
| uc003ejd.2,uc011bkl.2                                                                                                                          | TXNRD3    | -4.79 | 3.79E-07 | 6.42 | 5.64E-05 |
| uc002xlb.1,uc010zww.1                                                                                                                          | MYBL2     | 5.80  | 4.56E-07 | 6.34 | 6.74E-05 |
| uc003xyx.1                                                                                                                                     | MSC       | 2.75  | 4.62E-07 | 6.34 | 6.78E-05 |
| uc003gjj.3,uc003gik.3,uc011bwb.2                                                                                                               | EVC2      | 2.66  | 4.89E-07 | 6.31 | 7.12E-05 |
| uc001qez.3,uc001qfb.3,uc009zco.3,uc009zcp.3,uc009zsq.2                                                                                         | ARHGAP32  | -4.21 | 5.01E-07 | 6.30 | 7.25E-05 |

|                                                                                                                                                                                                                                        |          |        |          |      |             |
|----------------------------------------------------------------------------------------------------------------------------------------------------------------------------------------------------------------------------------------|----------|--------|----------|------|-------------|
| uc001quy.3,uc009zgg.2                                                                                                                                                                                                                  | RIMKLB   | -2.34  | 5.11E-07 | 6.29 | 7.34E-05    |
| uc003bhl.1,uc003bhm.1,uc003bhn.3,uc011aqy.2,uc011aqz.2                                                                                                                                                                                 | GTSE1    | 3.26   | 5.67E-07 | 6.25 | 7.98E-05    |
| uc003kgy.1,uc010jap.2,uc011ctl.2,uc011ctm.2                                                                                                                                                                                            | DHFR     | 1.90   | 5.67E-07 | 6.25 | 7.98E-05    |
| uc003lww.3,uc003lwy.3,uc003lwz.4,uc011ddr.1,uc021yqg.1                                                                                                                                                                                 | ADAM19   | 2.29   | 5.68E-07 | 6.25 | 7.98E-05    |
| uc003opa.3,uc003opb.3,uc003opd.3,uc003ope.3                                                                                                                                                                                            | MOCS1    | -15.00 | 6.01E-07 | 6.22 | 8.38E-05    |
| uc003fli.1,uc003flj.1,uc003flp.1,uc011bqr.1,uc011bqs.1                                                                                                                                                                                 | MCF2L2   | 1.94   | 6.37E-07 | 6.20 | 8.82E-05    |
| uc021vdr.1                                                                                                                                                                                                                             | RRM2     | 4.76   | 6.60E-07 | 6.18 | 9.08E-05    |
| uc003fhs.3,uc003fht.3,uc003fhu.4,uc003fhv.1                                                                                                                                                                                            | PLD1     | 4.16   | 7.17E-07 | 6.14 | 9.73E-05    |
| uc002aco.3,uc002acp.3,uc002acq.3,uc002acr.3                                                                                                                                                                                            | RAB27A   | 1.57   | 7.18E-07 | 6.14 | 9.73E-05    |
| uc003awr.3                                                                                                                                                                                                                             | APOBEC3C | 1.49   | 7.59E-07 | 6.12 | 0.000102122 |
| uc002qqr.2,uc002qri.2,uc002qrj.3,uc002qrk.1,uc002qrl.2,uc002qrm.2,uc010yhs.1,uc010yht.1                                                                                                                                                | ZSCAN18  | -1.61  | 7.99E-07 | 6.10 | 0.000106769 |
| uc003xtw.1                                                                                                                                                                                                                             | TOX      | 1.54   | 8.89E-07 | 6.05 | 0.000118012 |
| uc003upz.3                                                                                                                                                                                                                             | ARPC1B   | 1.42   | 9.00E-07 | 6.05 | 0.000118667 |
| uc002urx.4,uc002ury.4,uc010fsb.3                                                                                                                                                                                                       | INPP1    | 2.75   | 9.28E-07 | 6.03 | 0.000121562 |
| uc001mpm.3,uc001mpn.5,uc001mpo.2,uc009yhv.3                                                                                                                                                                                            | E2F8     | 15.00  | 9.91E-07 | 6.00 | 0.000128967 |
| uc002fnp.3,uc002fnq.3                                                                                                                                                                                                                  | CPNE7    | 4.06   | 1.02E-06 | 5.99 | 0.000131335 |
| uc002icp.4,uc002icq.3,uc002ict.3,uc002icu.3,uc002ide.1,uc002idd.3,uc002ide.1,uc010cyx.3,uc010cyy.1,uc010cyz.2,uc010cza.2,uc010cze.3,uc010whl.2,uc010whm.2,uc010whn.2,uc010who.3,uc010whp.2,uc010whq.1,uc010whr.1,uc010whs.1,uc010wht.1 | BRCA1    | 2.04   | 1.02E-06 | 5.99 | 0.000131335 |
| uc002tvo.3,uc002tvp.3,uc002tvr.3,uc002tvs.3,uc002tvt.2,uc010fnn.3,uc010fno.3,uc021vqf.1,uc021vqg.1                                                                                                                                     | GTDC1    | 1.77   | 1.12E-06 | 5.95 | 0.000143374 |
| uc002tff.3,uc021vlz.1                                                                                                                                                                                                                  | LIMS3    | 2.20   | 1.14E-06 | 5.94 | 0.000145128 |
| uc001hzh.3,uc009xgq.3,uc021plj.1,uc021plk.1                                                                                                                                                                                            | EXO1     | 3.11   | 1.16E-06 | 5.93 | 0.000146289 |
| uc001stw.1                                                                                                                                                                                                                             | IFNG     | 3.77   | 1.17E-06 | 5.93 | 0.000146289 |
| uc002xle.4,uc002xlf.4,uc010ggo.3,uc010ggp.3,uc010zwk.2,uc021wdz.2,uc031rtm.1                                                                                                                                                           | TOX2     | 3.94   | 1.24E-06 | 5.91 | 0.000153549 |
| uc001vtv.3,uc001vtw.3,uc001vty.4,uc010agx.3,uc010tkd.2,uc010tke.2                                                                                                                                                                      | TFDP1    | 1.49   | 1.40E-06 | 5.85 | 0.000173034 |
| uc003srm.3,uc003srn.5,uc003sro.5,uc003srq.4,uc003srr.4,uc003srs.2,uc010ktr.3,uc010kts.4                                                                                                                                                | ICA1     | 2.28   | 1.41E-06 | 5.85 | 0.000173163 |
| uc003wnv.1,uc003wnw.1,uc003wnx.1,uc010lqu.1,uc011kwc.1,uc011kwd.1,uc011kwe.1                                                                                                                                                           | NCAPG2   | 1.81   | 1.42E-06 | 5.85 | 0.00017368  |
| uc002unu.3,uc002unv.3,uc010frj.1,uc010zfl.1                                                                                                                                                                                            | ITGA4    | 1.39   | 1.46E-06 | 5.84 | 0.000177139 |
| uc001pwf.3,uc001pwg.1                                                                                                                                                                                                                  | MCAM     | 2.98   | 1.47E-06 | 5.83 | 0.000177389 |
| uc003vez.3,uc003vfa.3,uc003vfc.3,uc003vfd.3,uc003vfe.3,uc011kmj.2,uc011kmk.2,uc022aka.1                                                                                                                                                | NRCAM    | -15.00 | 1.55E-06 | 5.81 | 0.000185293 |
| uc004dyd.1,uc004dye.1                                                                                                                                                                                                                  | PDZD11   | 1.69   | 1.58E-06 | 5.80 | 0.000188515 |
| uc003pjb.4,uc003pje.3                                                                                                                                                                                                                  | TTK      | 4.57   | 1.63E-06 | 5.79 | 0.000192518 |
| uc001tyj.3,uc001tyl.3,uc001tym.3                                                                                                                                                                                                       | DYNLL1   | 1.51   | 1.64E-06 | 5.79 | 0.000192914 |

|                                                                                                                          |         |       |          |      |             |
|--------------------------------------------------------------------------------------------------------------------------|---------|-------|----------|------|-------------|
| uc003xqh.1                                                                                                               | CEBPD   | 3.56  | 1.67E-06 | 5.78 | 0.000195246 |
| uc004dan.3,uc004dao.3,uc004dap.3,uc004dar.3,uc004dat.1,uc011mjt.2                                                        | ACOT9   | 1.52  | 1.69E-06 | 5.77 | 0.000196458 |
| uc001crc.1,uc001crd.1,uc001cre.1,uc001crf.1,uc001crg.1,uc010omn.1,uc010omo.1                                             | STIL    | 3.36  | 1.77E-06 | 5.75 | 0.000204507 |
| uc001tay.3,uc001taz.3                                                                                                    | DUSP6   | 2.39  | 1.79E-06 | 5.75 | 0.000205404 |
| uc001kxa.3,uc001kxb.3,uc001kxc.3,uc001kxd.1                                                                              | CALHM2  | 1.52  | 1.85E-06 | 5.73 | 0.000211259 |
| uc003qvb.1,uc003qvc.1,uc003qvd.1,uc010kkk.1,uc010kkl.1,uc011ego.1                                                        | RPS6KA2 | -1.75 | 1.99E-06 | 5.70 | 0.000225531 |
| uc004aqh.3                                                                                                               | CKS2    | 2.51  | 2.14E-06 | 5.67 | 0.000241435 |
| uc001mwo.4,uc001mwp.3,uc009ykk.3,uc010rfc.2                                                                              | PRR5L   | 3.65  | 2.15E-06 | 5.67 | 0.000241694 |
| uc002qot.3,uc002qou.3,uc010ygy.2,uc010ygz.2,uc010yha.2                                                                   | ZNF772  | -2.28 | 2.17E-06 | 5.66 | 0.000242089 |
| uc001oht.3,uc001ohu.3,uc001ohv.3,uc009yrf.3                                                                              | SLC29A2 | -1.96 | 2.21E-06 | 5.66 | 0.000244619 |
| uc001zci.1,uc010azf.3,uc010azg.1,uc010azh.1,uc010azi.1,uc010uap.2                                                        | WHAMMP2 | -1.55 | 2.25E-06 | 5.65 | 0.000248428 |
| uc003oef.4,uc011drf.2                                                                                                    | KIFC1   | 5.00  | 2.42E-06 | 5.62 | 0.000265656 |
| uc003giu.4,uc003giv.4,uc010idb.1,uc010idc.1,uc010idd.1,uc010ide.3,uc011bwc.2                                             | JAKMIP1 | 1.53  | 2.59E-06 | 5.59 | 0.000282103 |
| uc001mus.4,uc001mut.4,uc001muu.4,uc001muv.4,uc009yjk.3,uc009yjl.3,uc009yjm.3,uc009yka.3                                  | CD59    | 1.73  | 2.80E-06 | 5.55 | 0.000303398 |
| uc001hkm.3                                                                                                               | CENPF   | 2.63  | 2.92E-06 | 5.53 | 0.000314967 |
| uc003fqi.3,uc010hwq.3,uc021xhe.1                                                                                         | GPR160  | -2.17 | 2.94E-06 | 5.53 | 0.000315051 |
| uc001mlm.2,uc001mln.3,uc010rcr.2                                                                                         | PDE3B   | -1.36 | 2.95E-06 | 5.53 | 0.000315051 |
| uc002ewa.3,uc010cfe.3,uc010vlh.2                                                                                         | SMPD3   | -1.82 | 3.00E-06 | 5.52 | 0.000318579 |
| uc001lyw.4,uc009yeh.1,uc009yei.3,uc009yej.3,uc010qyc.2,uc010qyd.2                                                        | RRM1    | 1.40  | 3.06E-06 | 5.51 | 0.000323063 |
| uc001kfr.3,uc001kfs.3,uc001kft.3,uc001kfw.3,uc009xtp.3,uc010qna.2,uc010qnb.2,uc010qnc.2,uc010qnd.2,uc010qne.2,uc031pwn.1 | FAS     | 1.40  | 3.13E-06 | 5.50 | 0.000328761 |
| uc002ffw.4,uc002ffx.2,uc002ffy.4,uc010vnl.1,uc010vnm.1                                                                   | CENPN   | 1.83  | 3.24E-06 | 5.49 | 0.000337901 |
| uc001vud.3,uc001vuf.3,uc001vug.3                                                                                         | GAS6    | 3.15  | 3.37E-06 | 5.47 | 0.000350247 |
| uc001wjc.2,uc031qns.1                                                                                                    | PPP1R3E | -1.69 | 3.50E-06 | 5.46 | 0.000361677 |
| uc004edh.3,uc011mqr.2                                                                                                    | ITM2A   | 1.35  | 3.70E-06 | 5.43 | 0.000379855 |
| uc003wul.3,uc003wum.3,uc003wun.3,uc003wuo.3,uc003wup.3,uc003wuq.3,uc003wuu.3,uc010lsc.3,uc011kx1.2                       | CTSB    | 1.35  | 3.72E-06 | 5.43 | 0.000379855 |
| uc003ype.3,uc010mdg.3                                                                                                    | SNTB1   | -1.92 | 3.80E-06 | 5.42 | 0.000386284 |
| uc011jwz.2                                                                                                               | ZNF853  | -3.04 | 3.92E-06 | 5.41 | 0.000396007 |
| uc001aub.3,uc001auc.3,uc001aud.4,uc001aue.1,uc009vnm.3                                                                   | DHRS3   | -1.65 | 4.02E-06 | 5.40 | 0.000404658 |
| uc002yjk.2,uc021whl.1,uc031ruy.1,uc031ruz.1                                                                              | NRIP1   | -1.43 | 4.05E-06 | 5.39 | 0.000405549 |
| uc001qqw.1,uc001qqx.1,uc001qqy.1,uc001qra.1,uc001qrb.1,uc009zfd.1,uc010sfn.1                                             | GPR162  | -2.97 | 4.14E-06 | 5.38 | 0.000412375 |

|                                                                                                                                                                                                       |           |        |          |      |             |
|-------------------------------------------------------------------------------------------------------------------------------------------------------------------------------------------------------|-----------|--------|----------|------|-------------|
| uc011dkv.2                                                                                                                                                                                            | ZNF204P   | -1.97  | 4.46E-06 | 5.35 | 0.000442045 |
| uc003idx.1                                                                                                                                                                                            | TMEM155   | 6.01   | 4.58E-06 | 5.34 | 0.000451383 |
| uc001noq.3,uc001not.3,uc009ymv.3,uc010rla.2,uc010r<br>lb.2                                                                                                                                            | MS4A6A    | 4.40   | 4.73E-06 | 5.33 | 0.000463697 |
| uc001cgj.3                                                                                                                                                                                            | CITED4    | -1.69  | 4.86E-06 | 5.31 | 0.000474469 |
| uc003cjl.3,uc021wwa.1,uc021wwb.1,uc021wwc.1,uc0<br>21wwd.1                                                                                                                                            | CX3CR1    | 4.30   | 5.08E-06 | 5.29 | 0.000492891 |
| uc001cix.3,uc001ciy.3                                                                                                                                                                                 | CDC20     | 5.51   | 5.58E-06 | 5.25 | 0.000539059 |
| uc002ndi.2,uc002ndj.2,uc002ndk.1,uc002ndl.1                                                                                                                                                           | TPM4      | 1.33   | 5.96E-06 | 5.22 | 0.000573101 |
| uc001sif.2,uc001slg.2                                                                                                                                                                                 | TIMELESS  | 1.78   | 6.12E-06 | 5.21 | 0.000585469 |
| uc001elb.4                                                                                                                                                                                            | AK094156  | -1.58  | 6.26E-06 | 5.20 | 0.000596231 |
| uc001xdw.3,uc001xdx.3,uc010trv.2,uc010trw.2                                                                                                                                                           | DACT1     | -15.00 | 6.52E-06 | 5.19 | 0.000617531 |
| uc001vjt.1,uc001vju.1,uc001vjv.3,uc001vjw.1,uc001vj<br>x.1,uc010thv.2,uc010thw.2,uc021rkq.1                                                                                                           | LMO7      | -1.69  | 6.67E-06 | 5.18 | 0.000629438 |
| uc003xlp.3,uc003xlu.3,uc003xlv.3,uc003xlw.1,uc010l<br>wf.3,uc010lwk.3,uc011lbr.2,uc011lbs.2,uc011lbt.1,uc0<br>11lbu.2,uc011lv.2,uc011lbw.2,uc011lbu.1,uc022aau.1<br>,uc022aub.1,uc022auc.1,uc022aud.1 | FGFR1     | 2.27   | 7.40E-06 | 5.13 | 0.000694852 |
| uc002fjz.1,uc002fka.1,uc002fkb.3                                                                                                                                                                      | ZCCHC14   | -1.56  | 7.50E-06 | 5.12 | 0.000700469 |
| uc003hyt.2,uc003hyu.2,uc003hyv.2,uc003hyw.1,uc010<br>imb.2,uc011cfj.1,uc011cfk.2                                                                                                                      | LEF1      | -1.28  | 7.56E-06 | 5.12 | 0.000702945 |
| uc003gxx.4,uc003gxy.1,uc010igj.3,uc011bjz.2                                                                                                                                                           | TXK       | -1.32  | 7.61E-06 | 5.12 | 0.000703956 |
| uc001xbs.3,uc001xbt.3                                                                                                                                                                                 | DLGAP5    | 5.20   | 7.77E-06 | 5.11 | 0.000715535 |
| uc002rhr.3,uc002rhs.3,uc002rht.3                                                                                                                                                                      | CENPA     | 3.90   | 7.82E-06 | 5.11 | 0.000716748 |
| uc001fwf.4,uc001fwg.4,uc001fwh.4,uc001fwi.4,uc001<br>fwj.3,uc001fwk.3,uc009wtn.3                                                                                                                      | CD84      | 1.35   | 8.25E-06 | 5.08 | 0.000749187 |
| uc001kic.3                                                                                                                                                                                            | KIF11     | 3.03   | 8.25E-06 | 5.08 | 0.000749187 |
| uc001ima.3,uc001imb.3,uc001imc.3                                                                                                                                                                      | MCM10     | 7.94   | 8.42E-06 | 5.07 | 0.000760547 |
| uc003ier.4,uc003ies.4,uc003ict.3,uc003ieu.4                                                                                                                                                           | USP53     | -1.42  | 8.48E-06 | 5.07 | 0.000763076 |
| uc003gsv.4,uc011bxy.3,uc021xne.2                                                                                                                                                                      | DTHD1     | 6.72   | 9.02E-06 | 5.04 | 0.00080757  |
| uc002tfw.3                                                                                                                                                                                            | LIMS3     | 2.19   | 9.20E-06 | 5.04 | 0.000820281 |
| uc001qbc.3,uc001qbd.2,uc001qbe.3,uc001qbf.1,uc010<br>saq.2,uc010sar.2                                                                                                                                 | ROBO3     | -2.79  | 9.41E-06 | 5.03 | 0.000834929 |
| uc004aze.3,uc004azd.3,uc004aze.3,uc011lvc.2                                                                                                                                                           | TGFBR1    | -1.34  | 9.76E-06 | 5.01 | 0.000861991 |
| uc002ekm.1                                                                                                                                                                                            | LMF1      | -2.65  | 1.06E-05 | 4.98 | 0.000923643 |
| uc001qmu.3,uc001qmw.3,uc009zeg.3,uc010sep.2,uc01<br>0seq.2                                                                                                                                            | RAD51AP1  | 3.89   | 1.06E-05 | 4.98 | 0.000923643 |
| uc004dau.3,uc004dav.3,uc010nfv.3,uc022bty.1,uc031t<br>ha.1                                                                                                                                            | SAT1      | 1.32   | 1.08E-05 | 4.97 | 0.000941281 |
| uc002the.2,uc002thf.4,uc010yx1.1                                                                                                                                                                      | LOC541471 | 2.34   | 1.09E-05 | 4.96 | 0.000943879 |
| uc002niy.3,uc002niz.3,uc010ebp.3                                                                                                                                                                      | SSBP4     | 1.35   | 1.11E-05 | 4.96 | 0.000955213 |
| uc003yca.2                                                                                                                                                                                            | FABP5     | 2.54   | 1.11E-05 | 4.95 | 0.000955406 |
| uc001tqq.3                                                                                                                                                                                            | ARPC3     | 1.27   | 1.13E-05 | 4.95 | 0.000970855 |
| uc003kdl.4,uc003kdm.4,uc010izm.3                                                                                                                                                                      | FAM169A   | -1.53  | 1.16E-05 | 4.93 | 0.000989986 |
| uc002jvc.3,uc002jvd.2,uc002jve.1,uc002jvf.3,uc002jv                                                                                                                                                   | BIRC5     | 6.42   | 1.17E-05 | 4.93 | 0.000989986 |

|                                                                                                                                                                                 |           |       |          |      |             |
|---------------------------------------------------------------------------------------------------------------------------------------------------------------------------------|-----------|-------|----------|------|-------------|
| g.3,uc002jvh.3,uc002jvi.3,uc010dhk.1,uc010dhl.1                                                                                                                                 |           |       |          |      |             |
| uc003nem.3,uc003nen.3,uc021ymn.1,uc021ymo.1                                                                                                                                     | GMNN      | 1.86  | 1.21E-05 | 4.92 | 0.001021274 |
| uc002juw.2                                                                                                                                                                      | TK1       | 5.19  | 1.25E-05 | 4.90 | 0.001050015 |
| uc001knh.3,uc010qov.2                                                                                                                                                           | PGAM1     | 1.32  | 1.26E-05 | 4.90 | 0.001054867 |
| uc002dhv.3,uc002dhx.3,uc002dhy.4                                                                                                                                                | LOC81691  | 3.99  | 1.29E-05 | 4.89 | 0.00107923  |
| uc003zoe.2,uc003zof.3,uc011lne.1,uc011lnf.1                                                                                                                                     | MLLT3     | -1.31 | 1.33E-05 | 4.88 | 0.00110212  |
| uc003eed.3,uc003eee.4                                                                                                                                                           | POLQ      | 2.81  | 1.35E-05 | 4.87 | 0.001119081 |
| uc004erh.4                                                                                                                                                                      | SLC25A5   | 1.59  | 1.36E-05 | 4.87 | 0.001119081 |
| uc003wfb.2,uc003wfc.2,uc003wfd.2,uc011kug.2,uc011kuh.2,uc011kui.2,uc011kuj.2,uc022aov.1                                                                                         | EZH2      | 1.63  | 1.41E-05 | 4.85 | 0.001153665 |
| uc001rxy.3,uc001rxz.3,uc001rya.3                                                                                                                                                | POU6F1    | -1.50 | 1.47E-05 | 4.83 | 0.001203362 |
| uc002pwj.3,uc002pwk.3                                                                                                                                                           | NKG7      | 3.17  | 1.52E-05 | 4.82 | 0.001234519 |
| uc003fid.3,uc003fie.3,uc010hww.2,uc021xhk.1                                                                                                                                     | TNFSF10   | 1.63  | 1.62E-05 | 4.79 | 0.001306677 |
| uc001rtv.4,uc001rtw.4,uc001rtx.4,uc009zlh.3,uc031qhd.1,uc031qhe.1                                                                                                               | TROAP     | 3.27  | 1.62E-05 | 4.79 | 0.001306677 |
| uc001twr.2,uc009zws.1,uc010sza.1,uc010szb.1                                                                                                                                     | WSB2      | 1.37  | 1.68E-05 | 4.78 | 0.001342442 |
| uc002kag.3,uc002kak.2,uc002kal.2,uc021ufb.1                                                                                                                                     | ACTG1     | 1.23  | 1.68E-05 | 4.78 | 0.001342442 |
| uc003zyu.4,uc003zyv.3,uc003zyw.3,uc003zyx.3,uc010mle.1,uc031tdr.1                                                                                                               | RECK      | -1.40 | 1.72E-05 | 4.77 | 0.00136756  |
| uc001mok.3,uc001mol.3,uc009yho.2,uc010rdc.1,uc010rdd.2,uc021qep.1                                                                                                               | LDHA      | 1.25  | 1.76E-05 | 4.75 | 0.001395342 |
| uc002ugy.4,uc002ugz.4,uc031rqa.1                                                                                                                                                | CYBRD1    | 3.47  | 1.79E-05 | 4.75 | 0.001412545 |
| uc001vog.3,uc021rma.1                                                                                                                                                           | GPR183    | 1.25  | 1.81E-05 | 4.74 | 0.001422898 |
| uc003fay.1                                                                                                                                                                      | PA2G4P4   | -2.28 | 1.82E-05 | 4.74 | 0.00142713  |
| uc004bdo.1,uc004bdp.1,uc010mts.1                                                                                                                                                | CTNNAL1   | 2.27  | 1.88E-05 | 4.73 | 0.001467598 |
| uc002qbu.2,uc010eqq.1                                                                                                                                                           | ZNF813    | -1.68 | 1.95E-05 | 4.71 | 0.00151445  |
| uc001bzi.3,uc009vux.3                                                                                                                                                           | CLSPN     | 1.85  | 1.98E-05 | 4.70 | 0.00152666  |
| uc001pav.3,uc001paw.3,uc001pax.3,uc001pay.3,uc001paz.3,uc001pbb.3,uc001pbc.3,uc001pbd.3,uc001pbf.4,uc009yvj.3,uc010rte.2,uc010rtf.2,uc010rtg.2,uc010rth.2,uc010rti.2,uc010rtj.2 | SYTL2     | 1.75  | 1.98E-05 | 4.70 | 0.00152666  |
| uc003fbc.3                                                                                                                                                                      | LINC00880 | 3.28  | 2.00E-05 | 4.70 | 0.001538288 |
| uc001jlv.3,uc001jlw.3,uc001jlx.2,uc009xpf.1                                                                                                                                     | RTKN2     | -1.26 | 2.01E-05 | 4.70 | 0.001541486 |
| uc001zyv.3                                                                                                                                                                      | SPPL2A    | 1.34  | 2.07E-05 | 4.68 | 0.001580005 |
| uc002uic.1,uc002uid.1,uc010zej.1,uc010zek.1                                                                                                                                     | CDCA7     | 2.09  | 2.10E-05 | 4.68 | 0.001596511 |
| uc001msc.2,uc001msd.3                                                                                                                                                           | KIF18A    | 2.02  | 2.12E-05 | 4.67 | 0.001601717 |
| uc003ldh.3,uc003ldi.3,uc003ldj.3,uc003ldl.3,uc011cyx.2,uc011cyy.2                                                                                                               | CTNNA1    | 1.49  | 2.13E-05 | 4.67 | 0.001601717 |
| uc003oer.3,uc003oes.3,uc003oet.3,uc003oeu.4,uc010jvb.3                                                                                                                          | BAK1      | 1.28  | 2.13E-05 | 4.67 | 0.001601717 |
| uc002klp.3,uc002klq.3                                                                                                                                                           | MYOM1     | -2.11 | 2.21E-05 | 4.66 | 0.001652091 |
| uc002ofq.3,uc002ofr.1                                                                                                                                                           | ZNF585B   | -1.44 | 2.24E-05 | 4.65 | 0.001667656 |
| uc003oon.3                                                                                                                                                                      | KCNK5     | 3.25  | 2.29E-05 | 4.64 | 0.001700779 |
| uc004ejk.3,uc004ejl.3,uc004ejm.3,uc022cay.1,uc022cbe.1,uc022cbf.1,uc022cbg.1,uc022cbh.1                                                                                         | GPRASP2   | -2.00 | 2.31E-05 | 4.64 | 0.001701529 |

|                                                                                                    |           |       |          |      |             |
|----------------------------------------------------------------------------------------------------|-----------|-------|----------|------|-------------|
| uc003vop.2,uc003voq.2                                                                              | TSPAN33   | -2.33 | 2.31E-05 | 4.64 | 0.001701529 |
| uc002dca.4,uc002deb.4                                                                              | CPPED1    | 1.45  | 2.48E-05 | 4.61 | 0.001817503 |
| uc002rwo.4,uc002rwp.2,uc002rws.2,uc010fbm.3,uc010yol.2,uc010yom.2,uc021vhf.1                       | STON1     | 3.35  | 2.49E-05 | 4.60 | 0.001817503 |
| uc003awv.3,uc003aww.3,uc003awx.3,uc003awy.3,uc011aog.1,uc021wpr.1                                  | APOBEC3F  | 1.27  | 2.50E-05 | 4.60 | 0.001823835 |
| uc003fgn.1                                                                                         | AY940074  | -1.68 | 2.53E-05 | 4.60 | 0.001834082 |
| uc002xbc.2,uc002xbd.2,uc002xbe.2,uc010gey.2,uc010zum.1                                             | ACSS2     | -1.65 | 2.54E-05 | 4.60 | 0.001834082 |
| uc002spl.2,uc002spm.2,uc010fgi.2,uc010fgj.1                                                        | CAPG      | 2.09  | 2.58E-05 | 4.59 | 0.001856216 |
| uc003qvl.3,uc003qvm.4,uc003qvn.4,uc010kkm.3                                                        | CCR6      | 1.26  | 2.61E-05 | 4.58 | 0.001869499 |
| uc001ozg.3,uc001ozh.3                                                                              | GAB2      | 3.31  | 2.61E-05 | 4.58 | 0.001869499 |
| uc002hhn.3,uc010etc.3,uc010wca.1,uc021tux.1                                                        | CDK5R1    | -1.36 | 2.70E-05 | 4.57 | 0.001922689 |
| uc001xhn.1,uc001xho.1,uc001xhp.2,uc001xhq.1,uc010aqh.1                                             | PLEKHG3   | 1.95  | 2.78E-05 | 4.56 | 0.001972743 |
| uc002erk.1                                                                                         | FBXL8     | 1.90  | 2.79E-05 | 4.55 | 0.001975087 |
| uc003mib.1,uc003mic.3,uc010jkg.1,uc021yix.1                                                        | FAM153A   | -1.55 | 2.85E-05 | 4.55 | 0.002007802 |
| uc001ezl.3                                                                                         | S100A10   | 1.56  | 2.86E-05 | 4.54 | 0.002008333 |
| uc010efz.2,uc010ega.2,uc021utz.1,uc021uua.1,uc021uub.1,uc021uuc.1,uc021uud.1,uc021uue.1,uc021uuf.1 | RASGRP4   | 1.99  | 2.87E-05 | 4.54 | 0.002008333 |
| uc001udg.1,uc001udh.3,uc001udi.1,uc001udj.1,uc001udk.1                                             | HIP1R     | -1.31 | 2.89E-05 | 4.54 | 0.002012575 |
| uc001usu.3                                                                                         | LINC00426 | 1.45  | 3.09E-05 | 4.51 | 0.002148519 |
| uc002jlc.2,uc002jld.2,uc002jlk.3,uc010dfu.3,uc010wrb.2,uc010wrc.2,uc010wre.2                       | RAB37     | 1.24  | 3.14E-05 | 4.50 | 0.002155651 |
| uc002ftx.3,uc031qyv.1                                                                              | OVCA2     | 1.63  | 3.14E-05 | 4.50 | 0.002155651 |
| uc001crw.4,uc001crx.4                                                                              | BEND5     | -3.06 | 3.14E-05 | 4.50 | 0.002155651 |
| uc001jzi.3,uc001jzj.3,uc001jzk.3,uc001jzl.4,uc009xru.1                                             | DLG5      | 3.04  | 3.15E-05 | 4.50 | 0.002155651 |
| uc004ajv.4,uc004ajx.4                                                                              | OSTF1     | 1.24  | 3.20E-05 | 4.50 | 0.002175065 |
| uc002afz.3,uc031qsi.1                                                                              | CCNB2     | 5.12  | 3.20E-05 | 4.50 | 0.002175065 |
| uc001bkm.2,uc009vry.1                                                                              | MAN1C1    | -1.37 | 3.26E-05 | 4.49 | 0.002211425 |
| uc002rqv.3,uc021vgb.1,uc021vgc.1                                                                   | HNRPLL    | 1.25  | 3.28E-05 | 4.48 | 0.00221558  |
| uc002iko.4,uc002iks.2,uc010wkd.1                                                                   | ARL17A    | -1.75 | 3.34E-05 | 4.48 | 0.002248412 |
| uc003iwp.3,uc003iwq.3,uc003iwr.1                                                                   | MLF1IP    | 3.04  | 3.46E-05 | 4.46 | 0.002320623 |
| uc002dbf.3,uc021tda.1                                                                              | SNN       | -1.24 | 3.55E-05 | 4.45 | 0.002373257 |
| uc003ita.3,uc003itb.2,uc011ckc.1                                                                   | HMGB2     | 1.64  | 3.80E-05 | 4.42 | 0.002532191 |
| uc002fgt.3,uc010chg.1                                                                              | PLCG2     | 15.00 | 3.85E-05 | 4.41 | 0.002553788 |
| uc002jfh.3,uc002jfi.3,uc002jfi.1,uc010den.1                                                        | AXIN2     | -1.79 | 3.93E-05 | 4.41 | 0.002597729 |
| uc004blh.4,uc004bli.4,uc011lyk.3,uc031tew.1,uc031tex.1                                             | STOM      | 1.68  | 3.98E-05 | 4.40 | 0.002624079 |
| uc002tzk.4,uc002tzi.4,uc010foe.3,uc010fof.3                                                        | ACVR1C    | -2.98 | 4.05E-05 | 4.39 | 0.002659513 |
| uc003tmg.2,uc003tmh.2,uc003tmi.1,uc003tmj.2,uc010kym.2,uc022acj.1                                  | MYO1G     | 1.20  | 4.14E-05 | 4.38 | 0.002712531 |
| uc003fdf.1,uc003fdg.1,uc003fdh.3,uc003fdi.3,uc003fdj                                               | SMC4      | 1.60  | 4.28E-05 | 4.37 | 0.002793841 |



|                                                                                                                |           |       |          |      |             |
|----------------------------------------------------------------------------------------------------------------|-----------|-------|----------|------|-------------|
| .3,uc003fdl.3,uc010hwc.1,uc010hwd.3                                                                            |           |       |          |      |             |
| uc003bdk.3                                                                                                     | BIK       | 2.61  | 4.38E-05 | 4.36 | 0.002846737 |
| uc001ffq.3                                                                                                     | PMVK      | 1.78  | 4.45E-05 | 4.35 | 0.002889063 |
| uc002ank.3,uc002anl.3                                                                                          | KIAA0101  | 4.64  | 4.48E-05 | 4.35 | 0.002893588 |
| uc003hvn.1,uc003hvo.1                                                                                          | H2AFZ     | 1.18  | 4.51E-05 | 4.35 | 0.002898087 |
| uc002ete.1,uc010vjn.1,uc010vjo.1                                                                               | ATP6V0D1  | 1.25  | 4.51E-05 | 4.35 | 0.002898087 |
| uc004cks.2,uc004ckt.2                                                                                          | NPDC1     | 1.43  | 4.63E-05 | 4.33 | 0.002964825 |
| uc001efv.1,uc009wgy.1,uc021ose.1                                                                               | VANGL1    | 2.13  | 4.73E-05 | 4.33 | 0.003015426 |
| uc004ckj.1                                                                                                     | CLIC3     | 4.34  | 4.74E-05 | 4.32 | 0.003015493 |
| uc003kha.2,uc003khh.1,uc011ctn.2                                                                               | RASGRF2   | -1.45 | 4.77E-05 | 4.32 | 0.003023997 |
| uc002rqy.3                                                                                                     | GALM      | 1.24  | 5.01E-05 | 4.30 | 0.003164086 |
| uc003cek.3,uc003cel.3,uc003cem.3,uc010hfq.3,uc010hfr.3                                                         | RBMS3     | -2.06 | 5.22E-05 | 4.28 | 0.003287986 |
| uc002ibu.3,uc002ibv.3                                                                                          | HAUS1     | 1.35  | 5.24E-05 | 4.28 | 0.00329077  |
| uc003tvv.4,uc003tvw.4,uc003tvx.4,uc011keg.2                                                                    | AUTS2     | 1.94  | 5.29E-05 | 4.28 | 0.003311743 |
| uc003wfr.4,uc003wft.4,uc003wfu.3                                                                               | LOC155060 | -1.31 | 5.41E-05 | 4.27 | 0.003371511 |
| uc001yvg.3,uc010ayc.3,uc010ayd.3,uc010aye.1                                                                    | WHAMMP3   | -1.38 | 5.49E-05 | 4.26 | 0.003415416 |
| uc001gen.4,uc001geo.3,uc001gep.3,uc001geq.3,uc009wvh.3,uc031prf.1                                              | MPZL1     | -1.63 | 5.61E-05 | 4.25 | 0.00347845  |
| uc004eaf.3,uc011mpx.2,uc022bys.1                                                                               | CXCR3     | 1.89  | 5.63E-05 | 4.25 | 0.00347845  |
| uc001mhs.3,uc001mht.3,uc001mhu.3                                                                               | WEE1      | 1.36  | 5.69E-05 | 4.25 | 0.003501184 |
| uc001fga.3,uc001fgb.3                                                                                          | CKS1B     | 1.50  | 5.78E-05 | 4.24 | 0.00354625  |
| uc001rfs.3,uc001rft.3,uc009ziz.3                                                                               | ETNK1     | -1.17 | 5.92E-05 | 4.23 | 0.003622526 |
| uc002eec.4                                                                                                     | SHCBP1    | 3.25  | 5.97E-05 | 4.22 | 0.003641592 |
| uc002jal.4,uc002jam.1,uc002jan.1,uc002jao.4,uc010wpe.2                                                         | TANC2     | -2.47 | 6.03E-05 | 4.22 | 0.003669777 |
| uc001gcq.1,uc001gcr.1                                                                                          | NUF2      | 2.39  | 6.14E-05 | 4.21 | 0.003710372 |
| uc002xmj.3                                                                                                     | ADA       | 1.23  | 6.14E-05 | 4.21 | 0.003710372 |
| uc003owu.1,uc003owv.1,uc003oww.1,uc003owx.2,uc003owy.2,uc003owz.1,uc011dvp.1,uc011dvq.2,uc021y zw.1,uc021yzx.1 | SLC29A1   | 1.84  | 6.18E-05 | 4.21 | 0.003721867 |
| uc003prd.2,uc003pre.3                                                                                          | PRDM1     | 1.22  | 6.20E-05 | 4.21 | 0.003722154 |
| uc003mll.1,uc003mlm.1                                                                                          | RNF130    | -1.43 | 6.22E-05 | 4.21 | 0.003722195 |
| uc001znr.4,uc001zns.4,uc001znt.4,uc001znu.4,uc001znv.4,uc001znw.4,uc010ucw.2                                   | NUSAP1    | 3.37  | 6.53E-05 | 4.18 | 0.00390023  |
| uc003vvh.3,uc003vvi.3,uc003vvj.3,uc010lne.3,uc011kqu.2,uc011kqv.2,uc011kqw.2,uc011kqx.1                        | TBXAS1    | 2.75  | 6.72E-05 | 4.17 | 0.003992714 |
| uc003kor.1                                                                                                     | AK021888  | -4.66 | 6.73E-05 | 4.17 | 0.003992714 |
| uc003iec.4                                                                                                     | CCNA2     | 3.75  | 6.75E-05 | 4.17 | 0.003992714 |
| uc001hce.3,uc009xbj.1                                                                                          | NUAK2     | -1.76 | 6.78E-05 | 4.17 | 0.003997268 |
| uc003kdn.3                                                                                                     | GCNT4     | -1.42 | 6.91E-05 | 4.16 | 0.004060651 |
| uc003pyt.4,uc003pyu.2,uc003pyv.2                                                                               | HSF2      | -1.28 | 7.12E-05 | 4.15 | 0.004162805 |
| uc002jdp.1,uc002jdp.1,uc002jdr.1                                                                               | CD79B     | 1.31  | 7.12E-05 | 4.15 | 0.004162805 |
| uc004cqm.3,uc004cqn.4,uc010nda.3                                                                               | CD99      | 1.82  | 7.20E-05 | 4.14 | 0.004193249 |
| uc002rmr.4,uc002rms.1,uc010ezl.3,uc010ymm.2                                                                    | FAM179A   | 2.24  | 7.39E-05 | 4.13 | 0.004292992 |

|                                                                                                             |              |       |             |      |             |
|-------------------------------------------------------------------------------------------------------------|--------------|-------|-------------|------|-------------|
| uc0021dw.4                                                                                                  | ACAA2        | 1.23  | 7.71E-05    | 4.11 | 0.004463885 |
| uc002hez.2,uc010wbn.2                                                                                       | BLMH         | 1.42  | 7.86E-05    | 4.10 | 0.004540463 |
| uc001ayw.4,uc001ayz.1,uc001aza.5,uc001azb.1,uc001azc.2,uc009vot.1,uc010oce.1                                | NBPF1        | -1.35 | 8.26E-05    | 4.08 | 0.004754637 |
| uc002dod.4,uc002doe.2,uc010vcl.2                                                                            | ZKSCAN2      | -2.10 | 8.35E-05    | 4.08 | 0.004791331 |
| uc002xwf.1,uc002xwg.1,uc010gih.1                                                                            | ATP9A        | 5.52  | 8.48E-05    | 4.07 | 0.004854105 |
| uc002ilv.1                                                                                                  | TBX21        | 2.12  | 8.56E-05    | 4.07 | 0.004882697 |
| uc002sfr.4,uc002sfs.4,uc010yqn.1,uc010yqo.2                                                                 | ANXA4        | 1.51  | 8.61E-05    | 4.06 | 0.004882697 |
| uc003wgn.4,uc011kur.2                                                                                       | ATP6V0E2-AS1 | -1.69 | 8.62E-05    | 4.06 | 0.004882697 |
| uc003taz.3,uc003tba.3,uc003tbb.3,uc003tbc.3,uc022abe.1,uc022abf.1                                           | GGCT         | 1.33  | 8.64E-05    | 4.06 | 0.004882697 |
| uc002vvg.3,uc010znd.2,uc010zne.2                                                                            | HJURP        | 4.51  | 8.65E-05    | 4.06 | 0.004882697 |
| uc002ypn.2                                                                                                  | URB1         | -1.64 | 8.83E-05    | 4.05 | 0.004969917 |
| uc003iwg.3,uc003iwh.3,uc003iwi.3                                                                            | CASP3        | 1.23  | 8.97E-05    | 4.05 | 0.005033768 |
| uc001xjf.3                                                                                                  | ATP6V1D      | 1.32  | 9.01E-05    | 4.05 | 0.0050383   |
| uc001zgw.3,uc001zgy.1,uc010ubw.1,uc010ubx.1                                                                 | ARHGAP11A    | 1.51  | 9.14E-05    | 4.04 | 0.005098617 |
| uc003ukt.1,uc003uku.1,uc003ukv.1,uc003ukx.1,uc003uky.2,uc003ukz.1,uc010les.1,uc011khl.1                     | CDK14        | 2.11  | 9.21E-05    | 4.04 | 0.005113406 |
| uc001ade.3,uc001adf.3                                                                                       | TNFRSF4      | 2.22  | 9.22E-05    | 4.04 | 0.005113406 |
| uc002kky.3,uc002kkz.3                                                                                       | YES1         | -1.56 | 9.26E-05    | 4.03 | 0.005122089 |
| uc002efk.2,uc021tht.1                                                                                       | LOC100507577 | -1.30 | 9.37E-05    | 4.03 | 0.00516675  |
| uc021yfx.1,uc021yfy.1,uc021y fz.1                                                                           | ZNF300       | -3.67 | 9.78E-05    | 4.01 | 0.005379848 |
| uc001bqa.2,uc001bqb.2,uc001bqc.2,uc001bqe.2,uc001bqf.2,uc001bqg.2                                           | RCC1         | 1.41  | 9.85E-05    | 4.01 | 0.005403454 |
| uc002znb.3                                                                                                  | DQ570096     | -1.75 | 9.93E-05    | 4.00 | 0.005420556 |
| uc002sdj.2,uc002sdk.4,uc002sdl.4,uc010yqb.1,uc010yqc.2,uc010yqd.1                                           | CEP68        | -1.22 | 9.94E-05    | 4.00 | 0.005420556 |
| uc002evt.2,uc002evu.2,uc002evv.2,uc010cfb.2,uc010cfc.1                                                      | SLC7A6       | -1.14 | 0.000101097 | 4.00 | 0.005496975 |
| uc003kfy.4,uc010jab.4,uc010jac.4,uc010jad.4                                                                 | HOMER1       | -3.00 | 0.000102494 | 3.99 | 0.005542515 |
| uc003keo.3                                                                                                  | F2RL1        | -1.73 | 0.000102633 | 3.99 | 0.005542515 |
| uc002vsy.2                                                                                                  | TIGD1        | -1.22 | 0.000102786 | 3.99 | 0.005542515 |
| uc002tuw.4                                                                                                  | MCM6         | 1.22  | 0.000103722 | 3.98 | 0.005577567 |
| uc003xuw.3                                                                                                  | GGH          | 1.99  | 0.000105778 | 3.98 | 0.005660563 |
| uc002wia.1,uc002wib.1                                                                                       | LZTS3        | -2.03 | 0.000105846 | 3.98 | 0.005660563 |
| uc004dyf.2,uc004dyg.3,uc010nkw.3                                                                            | KIF4A        | 5.54  | 0.000107032 | 3.97 | 0.005708384 |
| uc001tei.3,uc009ztf.3,uc009ztg.3                                                                            | NTN4         | 3.71  | 0.000108716 | 3.96 | 0.005782391 |
| uc001hpw.3,uc010pvl.2,uc021pjv.1                                                                            | H3F3A        | 1.11  | 0.000109395 | 3.96 | 0.005802694 |
| uc002rly.3                                                                                                  | LOC100505716 | -2.08 | 0.000109725 | 3.96 | 0.005804408 |
| uc001jrv.3,uc001jrw.4,uc001jrx.4,uc001jry.3,uc001jrz.3,uc001jsc.1,uc001jsg.4,uc001jsh.4,uc001jsi.4,uc001jsj | CDH23        | -1.57 | 0.000110088 | 3.96 | 0.0058079   |

|                                                                                                                                             |                |       |             |      |             |
|---------------------------------------------------------------------------------------------------------------------------------------------|----------------|-------|-------------|------|-------------|
| .4,uc009xql.3,uc010qjr.2,uc021psl.1                                                                                                         |                |       |             |      |             |
| uc001xap.3,uc001xar.3,uc010aai.1,uc010aoj.2                                                                                                 | CDKN3          | 2.83  | 0.000110411 | 3.96 | 0.005809249 |
| uc003lep.1,uc003leq.1,uc003lcr.1,uc003lcs.1,uc003lct.1,uc003lcu.1,uc010jet.1,uc011cyp.1,uc031slf.1                                          | CDC25C         | 15.00 | 0.000112268 | 3.95 | 0.005891041 |
| uc001oma.4,uc009yry.4,uc031qbz.1                                                                                                            | CDK2AP2        | 1.19  | 0.000114393 | 3.94 | 0.00598644  |
| uc003yia.3,uc010mbg.3                                                                                                                       | LAPTM4B        | -1.41 | 0.00011484  | 3.94 | 0.005993779 |
| uc011bds.2                                                                                                                                  | DOCK3          | -2.50 | 0.000115718 | 3.94 | 0.00602351  |
| uc001dhg.4,uc001dhh.2,uc010orh.1                                                                                                            | ST6GALNA<br>C3 | -2.83 | 0.000117316 | 3.93 | 0.006090426 |
| uc003jpl.1                                                                                                                                  | GZMK           | 3.92  | 0.000118896 | 3.92 | 0.006156103 |
| uc002vry.4                                                                                                                                  | NMUR1          | 2.93  | 0.000124159 | 3.91 | 0.006411593 |
| uc002kyl.3,uc002kym.3,uc002kyn.1,uc002kyo.1                                                                                                 | ZSCAN30        | -1.37 | 0.000131752 | 3.88 | 0.00677469  |
| uc003geu.1,uc003gev.1,uc021xko.1,uc021xkp.1                                                                                                 | MXD4           | 1.15  | 0.000131966 | 3.88 | 0.00677469  |
| uc002aga.4                                                                                                                                  | MYO1E          | 4.39  | 0.000132231 | 3.88 | 0.00677469  |
| uc001tuz.3,uc001tva.3,uc001tvb.3,uc001tvc.3,uc001tv<br>d.1                                                                                  | SLC24A6        | -1.12 | 0.000133819 | 3.87 | 0.006838063 |
| uc001zht.3,uc001zhu.3,uc001zhv.3,uc001zhw.3,uc001<br>zhx.3,uc001zhy.3,uc001zhz.3,uc001zia.3,uc001zib.3,u<br>c001zic.3,uc001zid.3,uc010bau.3 | SLC12A6        | -1.13 | 0.00013709  | 3.86 | 0.006986948 |
| uc003zxi.3,uc010mkx.2,uc011lox.2,uc011loy.2,uc022b<br>gm.1                                                                                  | CCDC107        | 1.24  | 0.000138566 | 3.86 | 0.007043775 |
| uc003bmb.5,uc003bmc.5,uc003bmd.5,uc003bme.5,uc0<br>10hbd.4,uc011arz.1                                                                       | TYMP           | 2.23  | 0.000140164 | 3.85 | 0.007106491 |
| uc002jgk.3,uc002jgl.3                                                                                                                       | KPNA2          | 1.66  | 0.000140995 | 3.85 | 0.007119546 |
| uc002vpl.2,uc002vpm.2                                                                                                                       | CCL20          | 5.62  | 0.000141487 | 3.85 | 0.007119546 |
| uc003xbv.3,uc003xbw.4,uc011kzk.1                                                                                                            | SORBS3         | -1.37 | 0.000141516 | 3.85 | 0.007119546 |
| uc003ehe.3,uc003ehf.1,uc003ehg.3,uc003ehh.1,uc003e<br>hi.3,uc003ehj.2,uc003ehk.3,uc010hru.2,uc010hrv.1,uc<br>010hrw.2,uc011bjy.1,uc011bjz.2 | KALRN          | -1.48 | 0.00014715  | 3.83 | 0.007366973 |
| uc001zvu.4,uc001zvz.4                                                                                                                       | SQRDL          | 1.16  | 0.000147341 | 3.83 | 0.007366973 |
| uc003pum.3                                                                                                                                  | GTF3C6         | 1.36  | 0.000147566 | 3.83 | 0.007366973 |
| uc003utt.3,uc003utu.3,uc022aii.1                                                                                                            | GAL3ST4        | -1.38 | 0.000148283 | 3.83 | 0.007383898 |
| uc003wir.2,uc003wis.2,uc022apy.1                                                                                                            | CDK5           | 1.63  | 0.000149642 | 3.82 | 0.007423208 |
| uc002tfc.3,uc002tfe.1,uc021vly.1                                                                                                            | RGPD6          | -2.12 | 0.000150165 | 3.82 | 0.007423208 |
| uc002qzx.3                                                                                                                                  | YWHAQ          | 1.12  | 0.000150491 | 3.82 | 0.007423208 |
| uc002jfd.3,uc002jfe.3,uc002jfg.3,uc010dem.3,uc021ub<br>w.1                                                                                  | RGS9           | 3.56  | 0.000150799 | 3.82 | 0.007423208 |
| uc004ebr.1,uc010nlq.1                                                                                                                       | FTX            | -1.35 | 0.000150974 | 3.82 | 0.007423208 |
| uc010fhg.4                                                                                                                                  | ANKRD36B<br>P2 | -3.81 | 0.000154371 | 3.81 | 0.007566136 |
| uc002ohb.2,uc002ohc.2                                                                                                                       | ZNF607         | -1.59 | 0.000154656 | 3.81 | 0.007566136 |
| uc001nfh.2                                                                                                                                  | PSMC3          | 1.15  | 0.000156004 | 3.81 | 0.007593164 |
| uc004erq.3,uc004err.3,uc022cdk.1                                                                                                            | NKRF           | -1.34 | 0.000156026 | 3.81 | 0.007593164 |
| uc001zmi.4,uc001zml.4,uc001zmm.1,uc001zmn.1,uc0<br>10bbw.3,uc010bbx.3                                                                       | RAD51          | 3.94  | 0.000156376 | 3.81 | 0.007593164 |

|                                                                                                    |           |       |             |      |             |
|----------------------------------------------------------------------------------------------------|-----------|-------|-------------|------|-------------|
| uc001ywk.3                                                                                         | NDN       | 3.80  | 0.000157014 | 3.80 | 0.007605264 |
| uc001lvt.3,uc021qcf.1                                                                              | ASCL2     | 15.00 | 0.000157849 | 3.80 | 0.007626748 |
| uc003xtz.1,uc003xua.1,uc003xub.3                                                                   | CA8       | 15.00 | 0.000159823 | 3.80 | 0.007703064 |
| uc003xue.3,uc003xuf.3,uc022aux.1                                                                   | CHD7      | -1.13 | 0.000160338 | 3.79 | 0.007708858 |
| uc003hub.3,uc011cdz.2                                                                              | TSPAN5    | 1.17  | 0.000164994 | 3.78 | 0.007913211 |
| uc001vft.1,uc010tgq.1                                                                              | LINC00282 | -2.63 | 0.000166272 | 3.78 | 0.007954965 |
| uc002owp.3,uc010eiu.1                                                                              | ETHE1     | 1.42  | 0.000169277 | 3.77 | 0.008078965 |
| uc003fsv.3,uc003fsw.3                                                                              | CCDC50    | 1.43  | 0.000171534 | 3.77 | 0.008166711 |
| uc001gpa.2,uc001gpb.2,uc001gpc.2,uc001gpd.2,uc010pnt.2,uc021pfv.1,uc021pfw.1                       | GLUL      | -1.13 | 0.000175535 | 3.76 | 0.008336861 |
| uc001dyt.2,uc001dyu.2,uc001dyw.4,uc021orj.2                                                        | CSF1      | 1.27  | 0.00018061  | 3.74 | 0.008557071 |
| uc002lmd.3,uc021ulp.1                                                                              | ZNF516    | -2.66 | 0.000181818 | 3.74 | 0.008593426 |
| uc001xgh.4,uc001xgi.4,uc021ruf.1,uc031qox.1                                                        | WDR89     | -1.18 | 0.000182336 | 3.74 | 0.008597109 |
| uc003nwr.3                                                                                         | CLIC1     | 1.28  | 0.000184742 | 3.73 | 0.008689548 |
| uc003slw.3                                                                                         | SNX8      | 1.97  | 0.000185217 | 3.73 | 0.008690955 |
| uc003kbb.3,uc010iyn.3,uc010jmw.1,uc011crv.1,uc011crw.1,uc011crx.1                                  | GUSBP9    | -1.33 | 0.000186497 | 3.73 | 0.008730009 |
| uc001uey.1                                                                                         | RILPL2    | 1.27  | 0.00019147  | 3.72 | 0.008941352 |
| uc001iig.2,uc001iih.2,uc001iii.2,uc009xic.2                                                        | ASB13     | -1.44 | 0.000192692 | 3.72 | 0.008976968 |
| uc001bmp.4                                                                                         | HMG2      | 1.06  | 0.000197775 | 3.70 | 0.009191852 |
| uc003yov.3                                                                                         | DSCC1     | 4.15  | 0.000200528 | 3.70 | 0.009297648 |
| uc003hpi.1,uc003hpi.3,uc003hpk.3,uc003hpl.3,uc003hpm.3,uc010ikf.3                                  | ARHGAP24  | 15.00 | 0.000205651 | 3.69 | 0.009512573 |
| uc003yad.3,uc022awb.1                                                                              | LY96      | 2.53  | 0.00021007  | 3.68 | 0.009694003 |
| uc011bgy.3                                                                                         | GPR15     | 1.86  | 0.000211517 | 3.67 | 0.00973778  |
| uc003lwk.2,uc003lwl.3                                                                              | HAVCR2    | 1.47  | 0.000214983 | 3.67 | 0.00987404  |
| uc003soq.4,uc003sor.4,uc003sot.4,uc011jwi.1                                                        | ACTB      | 1.05  | 0.000216167 | 3.67 | 0.009885146 |
| uc001izb.4,uc001izc.4,uc001izd.2,uc009xmc.2,uc010qeu.2,uc031pue.1,uc031pug.1                       | ZNF248    | -1.15 | 0.000216799 | 3.66 | 0.009885146 |
| uc001alm.1,uc001aln.3                                                                              | AJAP1     | -5.34 | 0.000217289 | 3.66 | 0.009885146 |
| uc001urx.3,uc001ury.3,uc001urz.3,uc010tdo.1                                                        | PAN3      | -1.17 | 0.000217336 | 3.66 | 0.009885146 |
| uc002ffu.3                                                                                         | CMC2      | 1.22  | 0.000217757 | 3.66 | 0.009885146 |
| uc009wka.2                                                                                         | AK094156  | -1.42 | 0.000221124 | 3.66 | 0.010014702 |
| uc001oif.2,uc001oig.2,uc001oih.2,uc010rpe.2                                                        | DPP3      | 1.21  | 0.000223623 | 3.65 | 0.010104443 |
| uc001pkb.1,uc001pkc.1,uc001pkd.4,uc001pke.2,uc001pkf.3,uc001pkg.1,uc009yxr.1,uc009yxs.1,uc009yxt.1 | ATM       | -1.06 | 0.000224864 | 3.65 | 0.010137048 |
| uc021wps.1,uc021wpt.1,uc021wpu.1,uc021wpv.1                                                        | APOBEC3H  | 3.29  | 0.000228707 | 3.64 | 0.010248122 |
| uc001rln.4                                                                                         | ALG10B    | -1.26 | 0.000228956 | 3.64 | 0.010248122 |
| uc002wpo.3,uc002wpp.3,uc010zrn.2,uc010zro.2                                                        | BFSP1     | 4.72  | 0.000229843 | 3.64 | 0.010248122 |
| uc001oku.1,uc001okv.1,uc001okw.1,uc001okx.1                                                        | PPP1CA    | 1.05  | 0.000229885 | 3.64 | 0.010248122 |
| uc003pyw.1                                                                                         | BC022047  | -1.62 | 0.000229953 | 3.64 | 0.010248122 |
| uc002xay.3,uc002xaz.1,uc002xba.1,uc010gex.3                                                        | GGT7      | -1.24 | 0.000232462 | 3.63 | 0.010336358 |
| uc003nac.3,uc011diq.2                                                                              | HIVEP1    | -1.81 | 0.000234288 | 3.63 | 0.010393868 |
| uc001pkk.3,uc010rvy.2,uc010rvz.2                                                                   | EXPH5     | -1.88 | 0.000235251 | 3.63 | 0.010412933 |
| uc003zsv.2,uc003zsx.3,uc010mju.3                                                                   | AQP3      | 1.08  | 0.00023895  | 3.62 | 0.010552739 |

|                                                                                             |          |       |             |      |             |
|---------------------------------------------------------------------------------------------|----------|-------|-------------|------|-------------|
| uc001bce.3,uc009vpk.3,uc010ocz.2,uc021ohr.1                                                 | CAPZB    | 1.06  | 0.000240672 | 3.62 | 0.010604785 |
| uc002hqr.3                                                                                  | PSMB3    | 1.26  | 0.000245138 | 3.61 | 0.010777242 |
| uc004ckq.2                                                                                  | FUT7     | 1.25  | 0.000250016 | 3.60 | 0.010966995 |
| uc002sdh.3,uc010ypz.2,uc010yqa.2                                                            | SLC1A4   | 1.83  | 0.000251942 | 3.60 | 0.011026682 |
| uc002qom.3,uc002qon.3                                                                       | ZNF548   | -1.14 | 0.000254054 | 3.60 | 0.011094259 |
| uc010ydi.2,uc010ydj.2                                                                       | ZNF836   | -1.33 | 0.000257282 | 3.59 | 0.01118823  |
| uc001blu.3                                                                                  | SH3BGRL3 | 1.25  | 0.000257605 | 3.59 | 0.01118823  |
| uc001hsn.4,uc001hso.3,uc001hsp.2,uc001hsq.2,uc001h<br>sr.1,uc009xez.2,uc009xfa.3            | OBSCN    | -1.33 | 0.000257925 | 3.59 | 0.01118823  |
| uc003idl.2,uc003idm.2                                                                       | MAD2L1   | 1.32  | 0.000258758 | 3.59 | 0.011199457 |
| uc001dej.4,uc001dek.4,uc001del.4,uc001dem.4                                                 | DEPDC1   | 3.27  | 0.000260975 | 3.58 | 0.011270432 |
| uc001rgc.3,uc001rgd.4,uc001rge.4,uc010six.2,uc010si<br>y.2                                  | BCAT1    | 7.15  | 0.000264021 | 3.58 | 0.0113768   |
| uc002jki.2,uc002jkk.2,uc002jkl.2,uc002jkm.4                                                 | KIF19    | 2.88  | 0.000267463 | 3.57 | 0.01145979  |
| uc002wzu.4                                                                                  | E2F1     | 2.49  | 0.000268014 | 3.57 | 0.01145979  |
| uc002ill.1,uc002ilm.3,uc002iln.3,uc010daz.1                                                 | EFCAB13  | -1.73 | 0.000268085 | 3.57 | 0.01145979  |
| uc002lht.3,uc010dpo.1,uc010xej.1,uc021uky.1                                                 | SEC11C   | 1.17  | 0.000268295 | 3.57 | 0.01145979  |
| uc003nas.2,uc003nat.2,uc003nau.3,uc003nav.3,uc021y<br>lt.1,uc021ylu.1,uc031smu.1            | GFOD1    | 3.11  | 0.00026986  | 3.57 | 0.011501438 |
| uc001nsg.3,uc021qkj.1                                                                       | FEN1     | 1.70  | 0.00027049  | 3.57 | 0.011503204 |
| uc002gaq.3,uc021tog.1                                                                       | ZFP3     | -1.45 | 0.000272001 | 3.57 | 0.011542311 |
| uc001iou.2                                                                                  | VIM      | 1.05  | 0.000274524 | 3.56 | 0.011624099 |
| uc002qbb.2,uc002qbc.2,uc010eql.2                                                            | ZNF347   | -1.44 | 0.000277638 | 3.56 | 0.011722678 |
| uc002vbz.2,uc002vca.2,uc010zix.2,uc031rqz.1,uc031rr<br>a.1,uc031rrb.1                       | KLF7     | -1.57 | 0.000278053 | 3.56 | 0.011722678 |
| uc001rmz.3                                                                                  | ZCRB1    | 1.24  | 0.000281645 | 3.55 | 0.011848529 |
| uc002dlz.1                                                                                  | PLK1     | 4.05  | 0.000285567 | 3.54 | 0.011973266 |
| uc001xkk.3,uc001xkl.3,uc001xkm.3,uc001xkn.3,uc001<br>xko.1,uc010ttb.2,uc010ttc.2,uc010ttt.1 | ACTN1    | -1.05 | 0.000285837 | 3.54 | 0.011973266 |
| uc002ily.3,uc002ilz.3,uc010wky.2                                                            | MRPL10   | 1.10  | 0.000291254 | 3.54 | 0.012174032 |
| uc002flu.3                                                                                  | CDT1     | 3.25  | 0.000294805 | 3.53 | 0.012296156 |
| uc003qil.2,uc003qim.2                                                                       | ABRACL   | 1.10  | 0.000297001 | 3.53 | 0.012323878 |
| uc004duu.4,uc004duv.4,uc004duw.4,uc004dux.1,uc01<br>0nkj.2,uc022bxv.1                       | SPIN3    | -1.12 | 0.000297059 | 3.53 | 0.012323878 |
| uc001tw.3,uc001tux.3,uc010syt.1,uc010syu.2                                                  | TPCN1    | -1.32 | 0.000297364 | 3.53 | 0.012323878 |
| uc002ist.1                                                                                  | AK090674 | -1.22 | 0.000298272 | 3.53 | 0.012335307 |
| uc001ont.3,uc009ysg.4                                                                       | LRP5     | -4.97 | 0.000306065 | 3.51 | 0.012630844 |
| uc002vds.3,uc002vdt.3,uc002vdt.3,uc002vdw.3,uc002<br>vdx.1,uc002vdy.1                       | KANSL1L  | -1.73 | 0.000307315 | 3.51 | 0.01265568  |
| uc001eyn.1,uc001eyo.3,uc001eyp.3,uc021oys.1,uc031<br>ppc.1                                  | SNX27    | -1.32 | 0.000309017 | 3.51 | 0.012698956 |
| uc001cdr.3,uc010oix.2                                                                       | HPCAL4   | -1.46 | 0.000312141 | 3.51 | 0.012800399 |
| uc003jhs.2,uc003jht.2                                                                       | SUB1     | 1.07  | 0.000312877 | 3.50 | 0.012803705 |
| uc004auw.4,uc010mrl.3                                                                       | FBP1     | -2.26 | 0.000318943 | 3.50 | 0.013024637 |
| uc003okl.3,uc003okm.3,uc003okn.3,uc010jvv.1,uc011                                           | PPARD    | -1.20 | 0.000325737 | 3.49 | 0.013274275 |

|                                                                                                                                                                                 |            |       |             |      |             |
|---------------------------------------------------------------------------------------------------------------------------------------------------------------------------------|------------|-------|-------------|------|-------------|
| dtb.2,uc011dtc.2                                                                                                                                                                |            |       |             |      |             |
| uc002cgs.2                                                                                                                                                                      | MRPL28     | 1.19  | 0.00033434  | 3.48 | 0.01359648  |
| uc004drv.3,uc004drw.3,uc004drx.1                                                                                                                                                | TSPYL2     | -1.04 | 0.00033547  | 3.47 | 0.013614099 |
| uc001rcu.2,uc001rev.2,uc001rcw.2,uc001rcx.2,uc001rcy.2,uc001rcz.2,uc001rda.2                                                                                                    | PTPRO      | -2.09 | 0.000338695 | 3.47 | 0.013716438 |
| uc002fxz.4,uc002fya.4,uc002fyb.4,uc010vsa.2                                                                                                                                     | MYBBP1A    | -1.11 | 0.000340078 | 3.47 | 0.013743944 |
| uc021vfv.1                                                                                                                                                                      | SH3RF3-AS1 | -2.63 | 0.00034573  | 3.46 | 0.013943484 |
| uc001uyw.2,uc001uyx.2                                                                                                                                                           | EPSTI1     | 1.34  | 0.000350413 | 3.46 | 0.014086411 |
| uc003njx.3                                                                                                                                                                      | HIST1H1B   | 4.27  | 0.000351914 | 3.45 | 0.014086411 |
| uc001wtd.3,uc010tpt.2,uc010tpu.2                                                                                                                                                | PSMA6      | 1.13  | 0.000352028 | 3.45 | 0.014086411 |
| uc003hrv.4,uc003hrw.2,uc011cdn.2,uc011cdo.2                                                                                                                                     | HERC3      | -1.06 | 0.00035216  | 3.45 | 0.014086411 |
| uc001ikr.1                                                                                                                                                                      | AF007147   | -1.79 | 0.000364554 | 3.44 | 0.014552347 |
| uc002snd.3                                                                                                                                                                      | HK2        | -1.40 | 0.000365921 | 3.44 | 0.014577092 |
| uc001pfx.1                                                                                                                                                                      | MAML2      | -1.15 | 0.000369888 | 3.43 | 0.014705106 |
| uc010zhw.2,uc010zhx.2                                                                                                                                                           | FAM117B    | -1.42 | 0.000371773 | 3.43 | 0.014750032 |
| uc004avh.3,uc004avi.4,uc010mrm.1,uc011lul.1,uc022bkl.1                                                                                                                          | FANCC      | -1.76 | 0.00037337  | 3.43 | 0.014783348 |
| uc001kcc.4,uc001kcd.4,uc001kce.4,uc001kcf.4,uc021pux.1,uc021puy.1                                                                                                               | FAM213A    | -1.80 | 0.00037523  | 3.43 | 0.014810771 |
| uc002svz.1,uc010fhu.1,uc010fhv.1,uc010yum.1,uc010yun.1                                                                                                                          | NCAPH      | 3.56  | 0.000375841 | 3.42 | 0.014810771 |
| uc002omq.4,uc002omr.4                                                                                                                                                           | PSMC4      | 1.07  | 0.000376339 | 3.42 | 0.014810771 |
| uc004ayt.3,uc004ayu.3,uc004ayv.2,uc004ayx.2,uc004ayy.2                                                                                                                          | ANKS6      | -1.23 | 0.000382196 | 3.42 | 0.015010984 |
| uc003dso.2,uc003dsp.3,uc003dsq.3,uc003dsr.3,uc003dss.3,uc003dst.3,uc003dsu.3,uc003dsv.3                                                                                         | CLDND1     | 1.04  | 0.000383417 | 3.42 | 0.015028706 |
| uc003lbr.5,uc003lbs.1,uc010jek.3,uc010jel.1,uc010jem.1,uc010jen.2,uc011cyc.2,uc011cyd.3,uc031sle.1                                                                              | KLHL3      | -1.13 | 0.000384789 | 3.41 | 0.01505225  |
| uc001cpl.2,uc009vye.2                                                                                                                                                           | RAD54L     | 3.65  | 0.000386999 | 3.41 | 0.015101893 |
| uc001ada.3,uc001adb.3,uc001adc.3,uc001add.3                                                                                                                                     | TNFRSF18   | 2.39  | 0.000387605 | 3.41 | 0.015101893 |
| uc001tgd.2,uc001tge.2,uc001tgf.2,uc001tgg.4,uc001tgh.4,uc001tgi.3,uc001tgj.3,uc001tgk.3,uc009ztp.3,uc009ztr.3,uc009zts.2,uc009ztt.1,uc010svd.2,uc010sve.2,uc010svf.2,uc010svg.2 | ANKS1B     | 2.71  | 0.000388463 | 3.41 | 0.015105192 |
| uc001bmc.3,uc009vsg.1                                                                                                                                                           | CD52       | 1.28  | 0.000392976 | 3.41 | 0.015250288 |
| uc003pfx.1                                                                                                                                                                      | OGFRL1     | 1.47  | 0.000397398 | 3.40 | 0.0153913   |
| uc001pxx.3,uc010rzp.1,uc010rzq.1                                                                                                                                                | SORL1      | -1.08 | 0.000405115 | 3.39 | 0.015659082 |
| uc002zdr.4                                                                                                                                                                      | CSTB       | 1.40  | 0.000418639 | 3.38 | 0.016149883 |
| uc002csj.4,uc002csk.4,uc002csl.4,uc010uwm.2                                                                                                                                     | PAQR4      | 2.58  | 0.000421474 | 3.38 | 0.016227154 |
| uc001uog.2                                                                                                                                                                      | FGF9       | -3.16 | 0.000422773 | 3.37 | 0.01624514  |
| uc002qpc.4,uc002qpd.4,uc002qpe.1,uc010eue.3,uc031rnf.1                                                                                                                          | ZNF550     | -1.10 | 0.000425572 | 3.37 | 0.016320549 |
| uc002xwx.3                                                                                                                                                                      | PFDN4      | 1.25  | 0.000429311 | 3.37 | 0.016405676 |
| uc001ein.4,uc009whp.3                                                                                                                                                           | FAM72B     | 4.23  | 0.000429472 | 3.37 | 0.016405676 |
| uc002vhd.4,uc002vhe.3,uc002vhf.3                                                                                                                                                | ARPC2      | 1.01  | 0.000430549 | 3.37 | 0.016414696 |

|                                                                                                                                                           |          |       |             |      |             |
|-----------------------------------------------------------------------------------------------------------------------------------------------------------|----------|-------|-------------|------|-------------|
| uc003cva.4,uc011bbw.2                                                                                                                                     | SLC25A20 | 1.37  | 0.000436889 | 3.36 | 0.01662392  |
| uc002hkf.3                                                                                                                                                | CCL5     | 1.37  | 0.000442937 | 3.35 | 0.016821254 |
| uc003qao.3                                                                                                                                                | CENPW    | 3.80  | 0.000449125 | 3.35 | 0.016998733 |
| uc001hyi.4,uc010pxv.1,uc010pxw.2,uc010pxx.2,uc010pxy.2                                                                                                    | MTR      | -1.06 | 0.000449352 | 3.35 | 0.016998733 |
| uc003bxj.2,uc003bxx.2                                                                                                                                     | CAND2    | -2.68 | 0.000452368 | 3.34 | 0.017079731 |
| uc001kiq.4,uc009xug.3                                                                                                                                     | CEP55    | 4.00  | 0.000453922 | 3.34 | 0.017092096 |
| uc001iwr.4,uc001iws.4,uc001iwt.4                                                                                                                          | ITGB1    | 1.02  | 0.000454447 | 3.34 | 0.017092096 |
| uc002pzq.2,uc010epq.1,uc010epr.2                                                                                                                          | ZNF808   | -1.12 | 0.000458467 | 3.34 | 0.017210154 |
| uc003fuj.3                                                                                                                                                | FAM43A   | 2.22  | 0.000470786 | 3.33 | 0.01763868  |
| uc001uzf.4,uc010acg.3                                                                                                                                     | LACC1    | 2.19  | 0.000478764 | 3.32 | 0.017903222 |
| uc001bzh.1,uc021oli.1                                                                                                                                     | C1orf216 | 1.26  | 0.00048879  | 3.31 | 0.018243172 |
| uc003ejp.4,uc010hsl.3,uc011bkm.3,uc011bkn.2                                                                                                               | MCM2     | 1.84  | 0.000490756 | 3.31 | 0.018281613 |
| uc001slj.3,uc001slk.3,uc001sll.3,uc009zos.3,uc009zot.3,uc021qzb.1,uc021qzc.1,uc021qzd.1                                                                   | GLS2     | -1.68 | 0.000492259 | 3.31 | 0.018302667 |
| uc003jbr.3,uc010ite.2                                                                                                                                     | TRIP13   | 2.94  | 0.000502918 | 3.30 | 0.018638472 |
| uc002jap.3,uc002jaq.3,uc002jar.3,uc002jas.3,uc002jat.3,uc010ddt.3,uc010wfp.2,uc010wpg.2                                                                   | CYB561   | 1.86  | 0.000503201 | 3.30 | 0.018638472 |
| uc002qsw.2                                                                                                                                                | ZNF324   | -1.18 | 0.000507718 | 3.29 | 0.018770181 |
| uc004awi.3,uc004awj.3,uc004awk.3,uc004awl.3                                                                                                               | CDC14B   | -1.17 | 0.000512049 | 3.29 | 0.018894507 |
| uc004ajy.2,uc004ajz.3,uc004aka.3,uc004akb.3,uc004akc.2                                                                                                    | PCSK5    | -2.84 | 0.000513683 | 3.29 | 0.018919032 |
| uc003qds.3,uc003qdt.3,uc003qdv.3,uc010kgb.3,uc031sps.1,uc031spt.1                                                                                         | VNN2     | -1.16 | 0.000515137 | 3.29 | 0.01893688  |
| uc002was.3,uc002wat.1,uc002wau.1,uc010fzm.1                                                                                                               | PPP1R7   | 1.07  | 0.000521708 | 3.28 | 0.019060882 |
| uc001qop.2,uc021qtv.1,uc031qfw.1                                                                                                                          | GAPDH    | 1.34  | 0.000522003 | 3.28 | 0.019060882 |
| uc001esg.4,uc010pbf.2                                                                                                                                     | BC023516 | -1.07 | 0.000522649 | 3.28 | 0.019060882 |
| uc001wzb.4,uc001wzc.3,uc001wzd.3,uc001wze.3,uc001wzf.3,uc001wzg.3                                                                                         | FRMD6    | -3.92 | 0.000522769 | 3.28 | 0.019060882 |
| uc003kvm.2,uc003kvn.2,uc003kvo.2,uc003kvp.2,uc003kvq.3,uc003kvr.3,uc003kvs.1,uc003kvt.1,uc003kvu.3,uc010jdi.2,uc010jdj.2,uc010jdk.3,uc010jdm.1,uc011exe.2 | RAPGEF6  | -1.02 | 0.000523393 | 3.28 | 0.019060882 |
| uc004dnb.3,uc010nip.3,uc031tjm.1                                                                                                                          | CACNA1F  | -3.65 | 0.00052913  | 3.28 | 0.019233907 |
| uc004dah.3,uc011mjr.2,uc011mjs.2                                                                                                                          | PHEX     | 15.00 | 0.000533213 | 3.27 | 0.019318415 |
| uc003ahb.3                                                                                                                                                | OSM      | 1.94  | 0.000533434 | 3.27 | 0.019318415 |
| uc003yke.3,uc003ykf.3,uc003ykg.3,uc003ykh.3,uc003yki.3,uc003yjk.3,uc003ykk.3,uc003ykl.3                                                                   | NCALD    | 1.51  | 0.000535233 | 3.27 | 0.019347667 |
| uc001npp.3,uc001npq.3,uc009ymy.1,uc009ymz.3,uc009yna.3,uc010rlc.2                                                                                         | MS4A1    | 2.23  | 0.000551367 | 3.26 | 0.01989404  |
| uc002yvz.3,uc002ywa.3,uc002ywb.3,uc002ywc.3,uc002ywd.1,uc010gne.1,uc010gnf.3,uc011aed.1,uc011aee.1                                                        | TTC3     | -0.99 | 0.000560687 | 3.25 | 0.020193011 |
| uc001kya.3,uc021pxr.1,uc021pxs.1                                                                                                                          | GSTO1    | 1.12  | 0.000563189 | 3.25 | 0.020245767 |
| uc002bdu.4,uc002bdv.4,uc002bdw.4,uc002bdx.4,uc010blf.3                                                                                                    | PSMA4    | 1.01  | 0.000572696 | 3.24 | 0.020549667 |

|                                                                   |                   |       |             |      |             |
|-------------------------------------------------------------------|-------------------|-------|-------------|------|-------------|
| uc003thy.3,uc003thz.1                                             | PSMA2             | 1.01  | 0.000574533 | 3.24 | 0.020567393 |
| uc001sjw.2,uc001sjx.2,uc010sqd.2,uc010sqe.2                       | MYL6              | 1.56  | 0.000575477 | 3.24 | 0.020567393 |
| uc010dwa.3                                                        | KANK3             | 1.45  | 0.000576351 | 3.24 | 0.020567393 |
| uc004fmp.2,uc010nvg.2,uc010nvh.2,uc011mzv.2,uc011mzw.2            | MPP1              | -1.30 | 0.000581063 | 3.24 | 0.020697726 |
| uc002abk.3,uc002abl.4,uc010bfb.3                                  | TMOD2             | -1.39 | 0.000583398 | 3.23 | 0.020743053 |
| uc003xdn.1,uc003xdo.3,uc003xdp.3,uc003xdq.3,uc003xdr.1            | SLC25A37          | -1.14 | 0.000589626 | 3.23 | 0.020926357 |
| uc002nsh.4,uc002nsi.4,uc021ury.1                                  | PLEKHF1           | 1.08  | 0.000595565 | 3.23 | 0.021098787 |
| uc001lkm.2,uc001lkn.2,uc001lko.3,uc021qay.1                       | GLRX3             | 1.07  | 0.000598303 | 3.22 | 0.021157377 |
| uc001eft.3,uc021osc.1                                             | TSPAN2            | 1.38  | 0.000601632 | 3.22 | 0.021233081 |
| uc003ifo.3,uc011cgs.2,uc011cgt.2                                  | PLK4              | 2.39  | 0.000604368 | 3.22 | 0.021233081 |
| uc002wes.3,uc002wet.3                                             | SNPH              | -1.55 | 0.000605343 | 3.22 | 0.021233081 |
| uc003yek.1,uc011lgc.1,uc011lgd.1                                  | DECR1             | 1.06  | 0.000605597 | 3.22 | 0.021233081 |
| uc001mub.3,uc001muc.3,uc010reg.1,uc010reh.1                       | DEPDC7            | -3.10 | 0.000606024 | 3.22 | 0.021233081 |
| uc001bsb.1                                                        | MATN1-AS1         | -1.63 | 0.00060697  | 3.22 | 0.021233081 |
| uc010jyy.1,uc031sma.1,uc031smb.1,uc031smc.1,uc031smd.1            | FAM153B           | -1.55 | 0.000608292 | 3.22 | 0.021241266 |
| uc003lsc.3,uc003lzd.3,uc003lse.3                                  | CD74              | 1.02  | 0.000612526 | 3.21 | 0.021319815 |
| uc003muf.4,uc003mug.4,uc003muh.3                                  | SERPINB9          | -1.05 | 0.000612932 | 3.21 | 0.021319815 |
| uc003bzi.3,uc003bzj.4                                             | NR2C2             | -1.18 | 0.000613818 | 3.21 | 0.021319815 |
| uc002qpf.3                                                        | ZNF416            | -1.45 | 0.000621843 | 3.21 | 0.021560163 |
| uc002mli.3,uc002mlj.3,uc002mlk.3,uc021uon.1                       | ZNF559-<br>ZNF177 | -2.56 | 0.000625658 | 3.20 | 0.021631607 |
| uc002awc.1                                                        | LOXL1             | 1.88  | 0.00062612  | 3.20 | 0.021631607 |
| uc002zxx.3,uc002zxy.3                                             | MMP11             | -3.00 | 0.000631676 | 3.20 | 0.021752322 |
| uc001wjl.3,uc001wjm.3,uc001wjn.3,uc010akk.3,uc010akl.1            | SLC22A17          | -2.48 | 0.000631843 | 3.20 | 0.021752322 |
| uc001nzc.3,uc001nzd.3,uc009ypk.2                                  | BAD               | 1.15  | 0.00063436  | 3.20 | 0.021800544 |
| uc003lcj.3,uc011cyo.2                                             | KIF20A            | 15.00 | 0.000635803 | 3.20 | 0.021811172 |
| uc010nko.3                                                        | ZC3H12B           | -1.49 | 0.000637973 | 3.20 | 0.021837165 |
| uc001coa.3,uc001cob.3,uc001coc.3,uc021omw.1                       | PRDX1             | 1.22  | 0.000638782 | 3.19 | 0.021837165 |
| uc003nrl.3,uc011dmq.2                                             | TUBB              | 1.18  | 0.000642677 | 3.19 | 0.021929653 |
| uc001blj.4,uc009vsb.3,uc010oew.2                                  | PDIK1L            | -1.16 | 0.000644122 | 3.19 | 0.021929653 |
| uc003wpx.4,uc011kwi.2                                             | MYOM2             | 2.66  | 0.000644858 | 3.19 | 0.021929653 |
| uc004erl.3,uc004erm.3,uc004erp.3                                  | UBE2A             | 1.06  | 0.000647305 | 3.19 | 0.021974614 |
| uc001iur.2                                                        | AX747507          | -5.25 | 0.00065228  | 3.19 | 0.022105057 |
| uc001xfl.3                                                        | TMEM30B           | -1.49 | 0.000655545 | 3.18 | 0.022177188 |
| uc003epn.1                                                        | BFSP2             | 2.73  | 0.000658911 | 3.18 | 0.022252497 |
| uc002lww.3,uc010dth.3,uc010dti.3,uc010xhb.2,uc010xhc.2,uc010xhd.1 | TLE2              | -1.82 | 0.000668933 | 3.17 | 0.022551949 |
| uc001ysv.3,uc001ysw.1,uc001ysx.1,uc021set.1,uc031q qx.1           | BC042994          | 1.79  | 0.000676513 | 3.17 | 0.022768156 |
| uc001tmj.3,uc001tmk.1,uc001tml.1,uc001tmm.1,uc009zut.1            | BTBD11            | -1.54 | 0.00067885  | 3.17 | 0.022807496 |



|                                                                                                    |                  |       |             |      |             |
|----------------------------------------------------------------------------------------------------|------------------|-------|-------------|------|-------------|
| uc003kmv.1,uc003kmw.1                                                                              | LNPEP            | -1.01 | 0.000681457 | 3.17 | 0.022855738 |
| uc002gkp.4                                                                                         | LINC00324        | 1.24  | 0.000683694 | 3.17 | 0.022890402 |
| uc002diy.4                                                                                         | LOC1001909<br>86 | -1.08 | 0.000684836 | 3.16 | 0.022890402 |
| uc001plg.4                                                                                         | POU2AF1          | 2.47  | 0.000686761 | 3.16 | 0.022915498 |
| uc001ctn.4,uc001cto.4,uc001ctp.4                                                                   | ZFYVE9           | -1.60 | 0.00068821  | 3.16 | 0.022924665 |
| uc003ugd.3,uc003ugf.3,uc003ugg.1,uc011kgo.2                                                        | GSAP             | -1.59 | 0.00069152  | 3.16 | 0.022969478 |
| uc002hbf.2,uc010wak.2,uc021ttr.1                                                                   | SLC46A1          | -2.09 | 0.000691908 | 3.16 | 0.022969478 |
| uc002mtb.2,uc010dym.1                                                                              | ZNF844           | -1.97 | 0.000697689 | 3.16 | 0.023114741 |
| uc002noh.3,uc010eci.2,uc010ecj.3,uc021urk.1                                                        | ZNF506           | -1.08 | 0.000698653 | 3.16 | 0.023114741 |
| uc002huv.3                                                                                         | CCR7             | -1.53 | 0.00070158  | 3.15 | 0.023172325 |
| uc001zog.1,uc001zoi.3,uc010ucy.2,uc010ucz.2,uc010uda.1                                             | MGA              | -1.04 | 0.000704419 | 3.15 | 0.023226802 |
| uc001qqq.3,uc001qqr.3                                                                              | PTMS             | 3.52  | 0.000705652 | 3.15 | 0.023228191 |
| uc001xbr.3,uc021rtj.1                                                                              | LGALS3           | 1.48  | 0.000711502 | 3.15 | 0.02338133  |
| uc001wqp.2,uc001wqq.4,uc001wqr.2,uc001wqt.1                                                        | COCH             | 3.39  | 0.00071491  | 3.15 | 0.023429949 |
| uc003zpl.3                                                                                         | CDKN2A           | 3.41  | 0.000715382 | 3.15 | 0.023429949 |
| uc002czc.4,uc002ezd.4,uc010buh.3,uc010bui.3,uc021tcs.1                                             | ABAT             | 1.36  | 0.000724968 | 3.14 | 0.023704144 |
| uc009wmw.3                                                                                         | CGN              | -2.28 | 0.000726315 | 3.14 | 0.023708464 |
| uc003smc.3,uc003smd.3,uc021zyu.1,uc021zyv.1                                                        | CHST12           | 1.14  | 0.000728077 | 3.14 | 0.023726316 |
| uc003zjg.4,uc010mho.1,uc010mhp.1,uc011lmc.2,uc011lmd.2                                             | PDCD1LG2         | 15.00 | 0.000731159 | 3.14 | 0.023774076 |
| uc002yww.4,uc002yww.4,uc002ywx.4,uc021wjc.1,uc031rvj.1,uc031rvk.1,uc031rvl.1,uc031rvm.1,uc031rvn.1 | KCNJ15           | 15.00 | 0.000732819 | 3.14 | 0.023774076 |
| uc002gaa.4                                                                                         | PFN1             | 1.43  | 0.000733196 | 3.13 | 0.023774076 |
| uc004cmg.1,uc004cmh.1                                                                              | TUBB4B           | 1.71  | 0.000736262 | 3.13 | 0.023833884 |
| uc002szj.1                                                                                         | TSGA10           | -1.62 | 0.000738469 | 3.13 | 0.023865763 |
| uc002ygn.4,uc002ygp.4,uc011abi.2                                                                   | ZGPAT            | 0.96  | 0.000743922 | 3.13 | 0.024002253 |
| uc002azi.4                                                                                         | COX5A            | 1.34  | 0.000746366 | 3.13 | 0.024022899 |
| uc001gea.1                                                                                         | GPA33            | -1.04 | 0.000747024 | 3.13 | 0.024022899 |
| uc002zpr.3,uc002zpt.3,uc011agz.1,uc011aha.2,uc021wlg.1                                             | CDC45            | 5.16  | 0.000749995 | 3.12 | 0.024078787 |
| uc001ofs.3,uc001oft.3                                                                              | CFL1             | 1.14  | 0.000763584 | 3.12 | 0.024474826 |
| uc002vaz.4                                                                                         | INO80D           | -1.02 | 0.000771982 | 3.11 | 0.024703422 |
| uc002uho.1,uc002uhp.1,uc010fqk.1,uc010fql.2,uc010fqm.1,uc010zdy.1                                  | ITGA6            | -0.96 | 0.00077633  | 3.11 | 0.024801895 |
| uc003qgt.1,uc003qgu.1,uc010kqp.1                                                                   | MTFR2            | 2.85  | 0.000781518 | 3.11 | 0.02490416  |
| uc001gqm.3,uc001gqo.3,uc010pof.1,uc010pog.2,uc010poh.2,uc010poi.2                                  | RGL1             | -1.97 | 0.000782082 | 3.11 | 0.02490416  |
| uc002ozc.4,uc002ozd.4,uc010ejj.3,uc010xwy.2,uc010xwz.2,uc010xxa.2                                  | ZFP112           | -3.89 | 0.00078359  | 3.11 | 0.024911517 |
| uc004esn.1,uc010nqm.1,uc022cdm.1                                                                   | ZBTB33           | -1.02 | 0.000791393 | 3.10 | 0.025118692 |
| uc001wmj.3                                                                                         | PSME2            | 1.33  | 0.000806765 | 3.09 | 0.02556502  |
| uc001ran.2,uc001rao.2                                                                              | DUSP16           | 1.18  | 0.000812862 | 3.09 | 0.025716478 |

|                                                                                         |           |       |             |      |             |
|-----------------------------------------------------------------------------------------|-----------|-------|-------------|------|-------------|
| uc002blb.2,uc002blc.2,uc031qtf.1,uc031qtg.1,uc031qth.1,uc031qti.1,uc031qtj.1            | SEC11A    | 1.01  | 0.000815145 | 3.09 | 0.025746974 |
| uc001jjx.1,uc001jyy.1,uc001jka.1,uc009xoy.2,uc031pvd.1                                  | ZWINT     | 2.65  | 0.000833922 | 3.08 | 0.02629751  |
| uc003gmn.3,uc021xme.1,uc031sds.1                                                        | ZNF518B   | -1.05 | 0.000837172 | 3.08 | 0.026357421 |
| uc001kin.3,uc001kio.3,uc001kip.4,uc009xue.3,uc009xuf.2                                  | MYOF      | 4.07  | 0.000842842 | 3.07 | 0.026493195 |
| uc002wva.3,uc002wvc.3,uc010ztg.2                                                        | ZNF337    | -1.03 | 0.000845194 | 3.07 | 0.02652443  |
| uc003mzh.3,uc010joq.2,uc021ylj.1                                                        | TMEM14C   | 1.10  | 0.000850833 | 3.07 | 0.026641063 |
| uc002xqh.3,uc002xqi.3,uc002xqj.4,uc010zxi.2                                             | CTSA      | 1.00  | 0.000851641 | 3.07 | 0.026641063 |
| uc003ujf.1,uc003ujg.1,uc003ujh.1,uc011khf.1                                             | DBF4      | 1.09  | 0.000856053 | 3.07 | 0.026674452 |
| uc031szb.1                                                                              | MGC27345  | -1.13 | 0.000858377 | 3.07 | 0.026674452 |
| uc002bqm.4,uc002bqn.4,uc010uqs.3,uc010uqt.2                                             | PRC1      | 2.56  | 0.000859139 | 3.07 | 0.026674452 |
| uc003xcz.2                                                                              | TNFRSF10D | -1.53 | 0.000859142 | 3.07 | 0.026674452 |
| uc001rpk.3,uc001rpl.3,uc001rpm.3,uc021qyg.1                                             | AMIGO2    | -1.05 | 0.000859541 | 3.07 | 0.026674452 |
| uc002nni.2,uc002nnj.2,uc010ecg.2                                                        | ZNF101    | -0.98 | 0.000863263 | 3.06 | 0.026747448 |
| uc002dww.3,uc002dwy.1,uc002dwz.1,uc010bzq.3,uc010vej.2                                  | CORO1A    | 0.95  | 0.00086854  | 3.06 | 0.026868301 |
| uc003tel.1,uc003tem.4,uc003ten.1                                                        | DPY19L1   | 1.22  | 0.000893615 | 3.05 | 0.027592198 |
| uc002tmg.3,uc002tmh.4,uc010flk.3,uc010flj.3,uc010flm.3                                  | EPB41L5   | -1.65 | 0.000894768 | 3.05 | 0.027592198 |
| uc002uwx.4,uc031rqp.1                                                                   | NDUFB3    | 1.65  | 0.000896405 | 3.05 | 0.027599108 |
| uc003arc.3                                                                              | RAC2      | 0.95  | 0.000900065 | 3.05 | 0.027668154 |
| uc001sjp.1,uc021qyw.1                                                                   | ZC3H10    | -1.58 | 0.000904414 | 3.04 | 0.027758125 |
| uc002mye.3                                                                              | ASF1B     | 3.08  | 0.000909874 | 3.04 | 0.027881863 |
| uc003gmo.4,uc003gmp.3                                                                   | CLNK      | 1.60  | 0.000917494 | 3.04 | 0.028071304 |
| uc002xjr.1,uc002xjs.1,uc002xjt.1,uc002xju.1,uc002xjv.1,uc002xjw.1,uc010ggg.1            | ZHX3      | -1.16 | 0.000922574 | 3.03 | 0.028182527 |
| uc004bel.3,uc004bcm.3                                                                   | ABCA1     | -1.78 | 0.0009271   | 3.03 | 0.028276548 |
| uc002boe.3,uc021sug.1                                                                   | TICRR     | 15.00 | 0.000930673 | 3.03 | 0.028341248 |
| uc002jib.2,uc002jic.2,uc002jid.2,uc002jie.2,uc002jif.2,uc002jig.2,uc002jih.2,uc010dfe.2 | ABCA5     | -1.03 | 0.000934211 | 3.03 | 0.028404671 |
| uc001got.4                                                                              | IER5      | 1.41  | 0.00094116  | 3.03 | 0.02857145  |
| uc001lor.4,uc001los.1,uc001lou.4,uc001lov.4,uc010quv.2                                  | ATHL1     | -1.02 | 0.000944252 | 3.02 | 0.028620803 |
| uc002ruv.3,uc002ruw.3                                                                   | EPAS1     | 15.00 | 0.000958908 | 3.02 | 0.029019975 |
| uc002vko.2,uc002vkp.2,uc002vks.2,uc010fwf.3,uc010zky.2                                  | STK16     | 1.53  | 0.000971083 | 3.01 | 0.029342944 |
| uc003ktf.2,uc010jey.3,uc011ewo.2                                                        | SNX24     | 2.06  | 0.000972835 | 3.01 | 0.029350446 |
| uc002dkp.2,uc010vbv.1                                                                   | RRN3P3    | 1.28  | 0.000978247 | 3.01 | 0.029444187 |
| uc003com.3,uc003con.3                                                                   | CDCP1     | -1.81 | 0.000978959 | 3.01 | 0.029444187 |
| uc001trq.1,uc001trs.2,uc001trt.1,uc010syd.1                                             | HVCN1     | -1.10 | 0.000985474 | 3.01 | 0.029565065 |
| uc001sgd.2,uc001sge.3,uc001sgf.3,uc009znq.3,uc010soz.2,uc010spa.1                       | PDE1B     | 1.47  | 0.000986007 | 3.01 | 0.029565065 |
| uc003ajc.4,uc003ajd.3                                                                   | MORC2-AS1 | -1.44 | 0.000988829 | 3.00 | 0.029604218 |

|                                                                                                                                                           |           |       |             |      |             |
|-----------------------------------------------------------------------------------------------------------------------------------------------------------|-----------|-------|-------------|------|-------------|
| uc003bzb.2,uc003bzq.2,uc003bzb.2                                                                                                                          | SH3BP5    | 1.02  | 0.000992334 | 3.00 | 0.029663655 |
| uc002hti.1,uc002htj.2,uc002htk.2                                                                                                                          | ORMDL3    | 1.39  | 0.00100001  | 3.00 | 0.029847378 |
| uc003qip.2,uc021zfb.2,uc021zga.2,uc021zgb.1                                                                                                               | CITED2    | 1.08  | 0.001003763 | 3.00 | 0.029909003 |
| uc003mju.3                                                                                                                                                | ZNF354C   | -1.49 | 0.001005139 | 3.00 | 0.029909003 |
| uc002erh.1,uc002eri.1,uc010vjb.1                                                                                                                          | TRADD     | 0.96  | 0.001011479 | 3.00 | 0.030032529 |
| uc003awt.4,uc003awu.4,uc010gxu.3,uc021wpq.1                                                                                                               | APOBEC3D  | 1.14  | 0.001012367 | 2.99 | 0.030032529 |
| uc004akf.4,uc004akh.4,uc010mpf.3,uc010mpg.3,uc010mph.3,uc010mpi.3,uc022bif.1                                                                              | GCNT1     | 1.22  | 0.001019179 | 2.99 | 0.030188737 |
| uc001zrg.3                                                                                                                                                | LCMT2     | -1.41 | 0.001028328 | 2.99 | 0.030389704 |
| uc001dvt.4,uc001dvu.4,uc009wer.3                                                                                                                          | HENMT1    | 1.05  | 0.001029078 | 2.99 | 0.030389704 |
| uc004bkr.2,uc004bks.1,uc004bkt.3,uc011lyf.1                                                                                                               | PHF19     | 1.62  | 0.001035858 | 2.98 | 0.030543724 |
| uc003qqb.3,uc003qqe.3,uc003qqf.3,uc003qqg.3,uc003qqh.3,uc010kjj.3,uc011efl.1                                                                              | TIAM2     | 3.13  | 0.00103987  | 2.98 | 0.030584786 |
| uc002obi.1,uc002obj.1,uc002obk.1                                                                                                                          | PSENE1    | 1.32  | 0.001041443 | 2.98 | 0.030584786 |
| uc001zme.3,uc010bbs.1,uc010bbt.1,uc010ucq.1                                                                                                               | CASC5     | 2.17  | 0.001041951 | 2.98 | 0.030584786 |
| uc001mdb.2,uc001mdc.1,uc001mdd.4,uc001mde.3,uc009yey.3,uc009yfa.3,uc009yfb.3,uc010rab.2,uc010rad.2,uc010rag.2,uc010rah.2,uc031pyt.1,uc031pyu.1,uc031pyv.1 | APBB1     | -0.95 | 0.001053084 | 2.98 | 0.03086516  |
| uc002nkk.3,uc002nkl.3,uc002nkm.3                                                                                                                          | COPE      | 0.99  | 0.001056615 | 2.98 | 0.030922233 |
| uc001lqz.3,uc001lra.3,uc010qwl.2                                                                                                                          | TALDO1    | 0.98  | 0.0010757   | 2.97 | 0.031433637 |
| uc001hir.2,uc001his.4,uc001hit.2,uc021piq.1,uc021pir.1                                                                                                    | NEK2      | 2.00  | 0.001084361 | 2.96 | 0.031639347 |
| uc001fwl.4,uc001fwm.3,uc010pjk.2,uc010pjl.2,uc010pjm.2                                                                                                    | SLAMF1    | 1.00  | 0.00110048  | 2.96 | 0.032061749 |
| uc002pft.1,uc002pfu.1                                                                                                                                     | AP2S1     | 1.34  | 0.00111372  | 2.95 | 0.032399131 |
| uc003nok.3,uc003nol.3,uc010jrq.3,uc010klp.2,uc011dmc.2,uc011dmd.2,uc021ytz.1,uc021yua.1,uc021yub.1                                                        | HLA-A     | 0.97  | 0.001120812 | 2.95 | 0.032538938 |
| uc003flq.2,uc021xid.1                                                                                                                                     | LINC00888 | 1.84  | 0.00112186  | 2.95 | 0.032538938 |
| uc002jmi.3,uc002jmk.4,uc002jmk.2,uc010wrs.2                                                                                                               | HID1      | -2.04 | 0.001124658 | 2.95 | 0.032571701 |
| uc003kud.2,uc010jdb.2,uc011cxb.2                                                                                                                          | LMNB1     | 1.59  | 0.001128558 | 2.95 | 0.032636238 |
| uc003gph.1,uc010ieg.3                                                                                                                                     | LAP3      | 1.03  | 0.001133455 | 2.95 | 0.032729363 |
| uc002let.3,uc002leu.3,uc010xdl.2                                                                                                                          | SKA1      | 1.35  | 0.001136341 | 2.94 | 0.032738424 |
| uc002alx.3,uc002aly.3                                                                                                                                     | RPS27L    | 1.25  | 0.001137124 | 2.94 | 0.032738424 |
| uc003njt.1,uc003nju.1,uc003njv.3                                                                                                                          | HIST1H2BN | 3.61  | 0.001144796 | 2.94 | 0.032910768 |
| uc001vdv.3,uc001vdw.3,uc001vdx.3,uc001vdy.3,uc001vdz.3,uc001vea.1,uc001veb.2                                                                              | DLEU2     | 2.07  | 0.00115059  | 2.94 | 0.03302871  |
| uc002xpl.3,uc002xpm.3,uc002xpn.3,uc002xpo.3,uc002xpp.3,uc002xpq.3                                                                                         | UBE2C     | 4.57  | 0.001154429 | 2.94 | 0.033090227 |
| uc003nix.2,uc021yoy.1                                                                                                                                     | HIST1H2BK | 1.56  | 0.001167864 | 2.93 | 0.033426263 |
| uc003xkw.3,uc003xkx.3,uc022atz.1                                                                                                                          | LSM1      | 1.06  | 0.001170374 | 2.93 | 0.033449046 |
| uc001hxt.3,uc010pxt.1                                                                                                                                     | ERO1LB    | -1.05 | 0.00117887  | 2.93 | 0.033616339 |
| uc001ozr.3,uc001ozs.3                                                                                                                                     | PRCP      | 1.11  | 0.001179672 | 2.93 | 0.033616339 |
| uc002rqd.3,uc002rqe.1,uc002rqf.1                                                                                                                          | PRKD3     | -0.99 | 0.001185545 | 2.93 | 0.033734472 |
| uc002rau.3,uc002rav.3,uc002raw.3,uc010yig.2,uc010y                                                                                                        | PDIA6     | 0.94  | 0.00118841  | 2.93 | 0.033766757 |

|                                                                                                                                                                                                                                                                                                                                                       |                 |        |             |      |             |
|-------------------------------------------------------------------------------------------------------------------------------------------------------------------------------------------------------------------------------------------------------------------------------------------------------------------------------------------------------|-----------------|--------|-------------|------|-------------|
| jh.2                                                                                                                                                                                                                                                                                                                                                  |                 |        |             |      |             |
| uc003cyo.1,uc003cyp.1,uc003cyq.1,uc003cyr.1,uc010hlg.1,uc011bdn.2,uc031rzx.1                                                                                                                                                                                                                                                                          | GNAI2           | 0.93   | 0.001193655 | 2.92 | 0.033840415 |
| uc003fjz.3,uc003fka.3,uc003fkb.3                                                                                                                                                                                                                                                                                                                      | MRPL47          | 1.08   | 0.001195541 | 2.92 | 0.033840415 |
| uc002ghc.4,uc002ghd.4                                                                                                                                                                                                                                                                                                                                 | ZBTB4           | -0.99  | 0.001196203 | 2.92 | 0.033840415 |
| uc0011wf.1                                                                                                                                                                                                                                                                                                                                            | CD81            | 1.25   | 0.001201604 | 2.92 | 0.033944015 |
| uc002gec.3,uc002ged.3,uc010vti.2                                                                                                                                                                                                                                                                                                                      | RNASEK-C17orf49 | 1.46   | 0.001207291 | 2.92 | 0.034055377 |
| uc003pfh.3,uc003pfi.3,uc003pfj.3,uc003pfk.3,uc003pfl.3,uc003pfn.1,uc003pfo.1,uc003pfp.3,uc010kan.2                                                                                                                                                                                                                                                    | FAM135A         | -1.21  | 0.001211023 | 2.92 | 0.034111364 |
| uc002oii.4                                                                                                                                                                                                                                                                                                                                            | PSMD8           | 1.05   | 0.001213082 | 2.92 | 0.034120116 |
| uc001rvv.4,uc001rvw.4,uc009zln.4,uc009zlo.4,uc021qxr.2,uc031qhf.1                                                                                                                                                                                                                                                                                     | ASIC1           | -3.60  | 0.001215995 | 2.92 | 0.034152831 |
| uc010cnq.2                                                                                                                                                                                                                                                                                                                                            | BC046191        | -3.13  | 0.001224284 | 2.91 | 0.034336249 |
| uc002qti.3,uc002qtj.3,uc002qtk.3                                                                                                                                                                                                                                                                                                                      | CHMP2A          | 1.24   | 0.001233873 | 2.91 | 0.034555537 |
| uc002gmx.3,uc002gmy.3                                                                                                                                                                                                                                                                                                                                 | TMEM220         | -1.71  | 0.001240371 | 2.91 | 0.034687751 |
| uc001nlf.2,uc001nlh.1,uc001nli.4,uc001nlj.4,uc001nlk.4,uc001nll.4,uc001nlm.4,uc001nln.4,uc001nlo.4,uc001nlp.4,uc001nlq.4,uc001nlr.4,uc001nls.4,uc001nlt.4,uc001nlu.4,uc001nlv.4,uc001nlw.4,uc001nlx.4,uc001nly.4,uc001nlz.4,uc001nma.4,uc001nmb.4,uc001nmc.4,uc001nmnd.4,uc001nme.4,uc001nmf.4,uc001nmg.4,uc001nmh.4,uc001nmi.4,uc009ymn.3,uc021qjk.1 | TMX2-CTNND1     | -1.37  | 0.001259089 | 2.90 | 0.035124387 |
| uc001iij.3,uc001iik.3                                                                                                                                                                                                                                                                                                                                 | FAM208B         | -1.03  | 0.001259584 | 2.90 | 0.035124387 |
| uc001ico.3,uc001icq.1,uc009xgv.3,uc010pyv.1                                                                                                                                                                                                                                                                                                           | ZNF496          | -1.38  | 0.001262087 | 2.90 | 0.035143987 |
| uc002azy.3,uc002azz.3,uc002baa.3,uc010umf.1                                                                                                                                                                                                                                                                                                           | COMMD4          | 1.11   | 0.001276871 | 2.89 | 0.035446775 |
| uc001jsa.2,uc001jsb.2,uc021psm.1                                                                                                                                                                                                                                                                                                                      | C10orf105       | -15.00 | 0.001277125 | 2.89 | 0.035446775 |
| uc002pym.3,uc002pyn.3                                                                                                                                                                                                                                                                                                                                 | ZNF616          | -1.28  | 0.001278408 | 2.89 | 0.035446775 |
| uc002ejd.2,uc010ccg.2                                                                                                                                                                                                                                                                                                                                 | BBS2            | -0.96  | 0.001283814 | 2.89 | 0.035546175 |
| uc002piv.2                                                                                                                                                                                                                                                                                                                                            | EMP3            | 1.10   | 0.001286104 | 2.89 | 0.035559125 |
| uc010ing.3,uc010ini.3,uc011cgj.2,uc021xrj.1                                                                                                                                                                                                                                                                                                           | TNIP3           | 2.03   | 0.001292982 | 2.89 | 0.035698734 |
| uc002jwu.1,uc002jvw.4,uc002jww.4,uc010wtz.1                                                                                                                                                                                                                                                                                                           | ENGASE          | -1.24  | 0.001295955 | 2.89 | 0.03573028  |
| uc004alc.3,uc004ald.3,uc004ale.3,uc004alf.3,uc010mprr.3,uc010mps.3,uc011lsq.2                                                                                                                                                                                                                                                                         | TLE4            | -0.96  | 0.001297993 | 2.89 | 0.035736002 |
| uc002ojc.1,uc002ojd.1,uc010egd.1                                                                                                                                                                                                                                                                                                                      | CAPN12          | 1.45   | 0.00130804  | 2.88 | 0.035913444 |
| uc002rku.3,uc002rkv.3,uc010ezb.3,uc010ezc.3,uc010yis.2,uc010ylt.1                                                                                                                                                                                                                                                                                     | IFT172          | -1.31  | 0.001308118 | 2.88 | 0.035913444 |
| uc001usf.3                                                                                                                                                                                                                                                                                                                                            | POMP            | 1.00   | 0.001310579 | 2.88 | 0.035930479 |
| uc001hxx.3                                                                                                                                                                                                                                                                                                                                            | GPR137B         | 1.28   | 0.001314948 | 2.88 | 0.035999692 |
| uc002slb.3                                                                                                                                                                                                                                                                                                                                            | WDR54           | 1.09   | 0.001333891 | 2.87 | 0.036467166 |
| uc001iua.1,uc001iub.1,uc009xkz.1,uc009xla.2,uc010qdv.1                                                                                                                                                                                                                                                                                                | MPP7            | -1.00  | 0.001336776 | 2.87 | 0.036494912 |
| uc003fre.1,uc021xim.1                                                                                                                                                                                                                                                                                                                                 | RPL39L          | 2.29   | 0.001346843 | 2.87 | 0.036718401 |
| uc001bkw.1                                                                                                                                                                                                                                                                                                                                            | AUNIP           | 2.80   | 0.001366339 | 2.86 | 0.037197963 |

|                                                                                                                                                           |          |        |             |      |             |
|-----------------------------------------------------------------------------------------------------------------------------------------------------------|----------|--------|-------------|------|-------------|
| uc001egu.4,uc010owz.1,uc010oxa.1                                                                                                                          | CD2      | 0.92   | 0.001378753 | 2.86 | 0.037470131 |
| uc002tlv.3,uc002tlw.3,uc002tlx.3,uc010yyh.2,uc010yyi.2,uc010yyj.2,uc010yyk.2,uc010yyyl.2,uc010yyym.2,uc010yyyn.2,uc010yyo.2,uc010yypp.1,uc021vnj.1        | DBI      | 1.52   | 0.001380204 | 2.86 | 0.037470131 |
| uc001xhb.3,uc010aqe.2,uc010aqf.3                                                                                                                          | MTHFD1   | 1.02   | 0.001385307 | 2.86 | 0.037470131 |
| uc021xpq.1                                                                                                                                                | AK128593 | -1.11  | 0.001388982 | 2.86 | 0.037470131 |
| uc003meg.3                                                                                                                                                | HIGD2A   | 0.99   | 0.001389044 | 2.86 | 0.037470131 |
| uc002uvv.4,uc002uvw.2,uc010zhd.1,uc010zhe.1                                                                                                               | SGOL2    | 1.49   | 0.001390442 | 2.86 | 0.037470131 |
| uc003php.3,uc003phq.3,uc010kba.3                                                                                                                          | CD109    | 2.47   | 0.001390666 | 2.86 | 0.037470131 |
| uc001xch.3                                                                                                                                                | PELI2    | -1.31  | 0.001391693 | 2.86 | 0.037470131 |
| uc003fih.3,uc003fii.3,uc003fij.2,uc003fik.2,uc003fil.2,uc003fim.2                                                                                         | ECT2     | 1.44   | 0.001396863 | 2.85 | 0.037557531 |
| uc002gkm.4,uc002gkn.4,uc002gko.4,uc010cnu.3,uc010vuu.3,uc021tpy.1                                                                                         | AURKB    | 4.42   | 0.001414608 | 2.85 | 0.03797343  |
| uc003vbc.2,uc003vbd.2,uc003vbe.2,uc003vbf.3,uc011klj.1                                                                                                    | NAPEPLD  | -1.10  | 0.001416222 | 2.85 | 0.03797343  |
| uc001hts.1,uc009xfd.1                                                                                                                                     | URB2     | -1.15  | 0.001425347 | 2.85 | 0.038165677 |
| uc003vwk.3                                                                                                                                                | KIAA1147 | -1.42  | 0.001427704 | 2.85 | 0.038176424 |
| uc004axy.4,uc004axz.4                                                                                                                                     | HEMGN    | -1.58  | 0.00143121  | 2.84 | 0.038192904 |
| uc002wuj.2,uc002wuk.2,uc002wul.2,uc002wum.2,uc002wuo.2,uc010gdj.1,uc010gdk.1,uc010gdl.1,uc010zsy.1,uc010zsz.1,uc010zta.1,uc010ztb.1,uc010ztc.1,uc010ztd.1 | ENTPD6   | -0.93  | 0.001432234 | 2.84 | 0.038192904 |
| uc031qqg.1                                                                                                                                                | JX073282 | -2.16  | 0.00143514  | 2.84 | 0.038218178 |
| uc001ftj.1                                                                                                                                                | AIM2     | 3.17   | 0.001441717 | 2.84 | 0.038341028 |
| uc004euf.4,uc004eug.4,uc004euh.4,uc004eui.4,uc010nqw.3,uc010nqx.3                                                                                         | SH2D1A   | 0.95   | 0.00144751  | 2.84 | 0.038442713 |
| uc001mee.3,uc001mef.3,uc001meh.3,uc010rap.2,uc010raq.2                                                                                                    | ILK      | 0.93   | 0.001451925 | 2.84 | 0.038481126 |
| uc003hbz.2,uc003hca.2,uc003hcb.2,uc003hcc.2,uc003hcd.2,uc003hce.2,uc011cad.1,uc031sei.1                                                                   | HOPX     | 2.65   | 0.001452899 | 2.84 | 0.038481126 |
| uc010vyd.1,uc010vye.1                                                                                                                                     | ZNF286B  | -1.06  | 0.001460451 | 2.84 | 0.038628733 |
| uc004cee.3,uc004cef.3,uc004ceg.3,uc011mdj.1                                                                                                               | SLC2A6   | -1.83  | 0.001464759 | 2.83 | 0.03869026  |
| uc003eqc.1,uc003eqd.1                                                                                                                                     | RYK      | -1.01  | 0.001468492 | 2.83 | 0.038736435 |
| uc003ayp.4,uc003ays.4,uc010gyb.1                                                                                                                          | ADSL     | 0.94   | 0.0014731   | 2.83 | 0.038805542 |
| uc003caw.3,uc003cax.3,uc010her.2,uc011awb.2                                                                                                               | OXNAD1   | -0.96  | 0.001478699 | 2.83 | 0.038900548 |
| uc001zqx.4,uc010ucl.1                                                                                                                                     | BUB1B    | 2.77   | 0.001486181 | 2.83 | 0.039044765 |
| uc002elg.2                                                                                                                                                | PLLP     | -15.00 | 0.001489762 | 2.83 | 0.039086221 |
| uc003kyt.3,uc003kyu.2,uc003kyv.3,uc003kyw.3,uc003kyl.3,uc003kyy.3,uc003kyz.3,uc003kza.3,uc003kzb.3,uc010jdu.3                                             | TCF7     | -0.92  | 0.001491832 | 2.83 | 0.039088003 |
| uc001bky.3,uc001bkz.3,uc001bla.3,uc001blb.3,uc001blc.3,uc010oev.2,uc021ojn.1                                                                              | STMN1    | 2.11   | 0.001518109 | 2.82 | 0.039723169 |
| uc002hsq.3                                                                                                                                                | MIEN1    | 1.00   | 0.001521042 | 2.82 | 0.039740714 |
| uc001vgt.2,uc001vgu.2,uc001vgv.2,uc010tha.1                                                                                                               | CKAP2    | 1.01   | 0.001522851 | 2.82 | 0.039740714 |

|                                                                                                                                                                      |          |       |             |      |             |
|----------------------------------------------------------------------------------------------------------------------------------------------------------------------|----------|-------|-------------|------|-------------|
| uc004dvv.3,uc004dvw.2,uc011mov.2,uc011mow.2,uc022byc.1,uc022byd.1                                                                                                    | ZC4H2    | -1.22 | 0.001529504 | 2.82 | 0.03986105  |
| uc003kbw.4,uc010iyw.1,uc010iyx.1,uc010iyy.1                                                                                                                          | MAP1B    | -1.84 | 0.001534729 | 2.81 | 0.039943874 |
| uc001bgw.3,uc021oif.2                                                                                                                                                | C1orf213 | -2.31 | 0.001541734 | 2.81 | 0.040072761 |
| uc001gwq.4,uc021phf.1                                                                                                                                                | PHLDA3   | 2.68  | 0.001547912 | 2.81 | 0.04017984  |
| uc001ays.2,uc001ayt.2                                                                                                                                                | CROCCP3  | -1.12 | 0.001552255 | 2.81 | 0.040239072 |
| uc001dwr.3,uc001dws.1,uc009wex.2,uc009wey.3,uc009wez.1,uc010ovg.3,uc021orb.1,uc031pnl.1                                                                              | KIAA1324 | 1.25  | 0.001563018 | 2.81 | 0.040464336 |
| uc003vmb.2,uc010llb.2                                                                                                                                                | ARF5     | 0.93  | 0.001569864 | 2.80 | 0.040587754 |
| uc002rk1.4                                                                                                                                                           | PPM1G    | 0.93  | 0.001578442 | 2.80 | 0.040755548 |
| uc003kyp.2,uc003kyq.2,uc003kyr.2,uc031slc.1                                                                                                                          | VDAC1    | 0.95  | 0.001597539 | 2.80 | 0.041194127 |
| uc001hhr.2,uc009xcu.2                                                                                                                                                | DIEXF    | -1.04 | 0.001602912 | 2.80 | 0.04127816  |
| uc001dmi.3,uc001dmj.3                                                                                                                                                | LMO4     | 2.54  | 0.001622762 | 2.79 | 0.041734271 |
| uc002odi.1,uc002odj.3,uc002odk.3,uc002odl.3                                                                                                                          | CAPNS1   | 1.07  | 0.001627202 | 2.79 | 0.041793388 |
| uc001vqy.3                                                                                                                                                           | RAB20    | -2.01 | 0.001631255 | 2.79 | 0.041842433 |
| uc002oxd.2,uc002oxf.2,uc002oxg.2                                                                                                                                     | PLAUR    | 3.22  | 0.001634106 | 2.79 | 0.041860565 |
| uc003kpf.3,uc003kpg.3,uc010jbv.3                                                                                                                                     | CAMK4    | -0.93 | 0.001640269 | 2.79 | 0.041963363 |
| uc001oup.1                                                                                                                                                           | UCP2     | 0.92  | 0.001643206 | 2.78 | 0.041983477 |
| uc001tll.3,uc001tlm.3,uc001tln.3,uc001tlo.1                                                                                                                          | TCP1L2   | -0.95 | 0.001649813 | 2.78 | 0.042097198 |
| uc003awk.3                                                                                                                                                           | NPTXR    | -1.68 | 0.001652218 | 2.78 | 0.042103521 |
| uc002ftf.3,uc002ftg.3,uc021tni.1,uc021tnj.1,uc021tnk.1,uc021tnl.1                                                                                                    | MIR22HG  | 2.11  | 0.001659052 | 2.78 | 0.042210097 |
| uc003wfl.3,uc011kul.2,uc011kum.2                                                                                                                                     | ZNF398   | -1.00 | 0.001660725 | 2.78 | 0.042210097 |
| uc001ubl.4,uc009zsj.4,uc031qjw.1,uc031qjx.1                                                                                                                          | PSMD9    | 0.95  | 0.001667392 | 2.78 | 0.042324435 |
| uc003cbr.3,uc003cbs.3,uc003cbt.3,uc003cbu.3,uc003cbv.3,uc003cbw.3,uc003cbx.3,uc003cby.3,uc003cbz.3,uc003cca.3,uc003ccb.3,uc003ccc.3,uc010hfa.3,uc021wtx.1,uc021wty.1 | SGOL1    | 1.65  | 0.00168008  | 2.77 | 0.04259112  |
| uc003zmv.2,uc003zmx.4,uc003zmy.3,uc003zms.2,uc010mio.3                                                                                                               | CNTLN    | 1.97  | 0.001690572 | 2.77 | 0.042801502 |
| uc003lal.1,uc003lam.1,uc003lan.1,uc003lao.1,uc003las.1,uc003lat.1,uc003lau.1,uc011cxz.1                                                                              | H2AFY    | 0.93  | 0.001694966 | 2.77 | 0.042857169 |
| uc001qhb.3,uc009zcz.2                                                                                                                                                | JAM3     | -2.22 | 0.001706026 | 2.77 | 0.043081006 |
| uc002ubu.3                                                                                                                                                           | PSMD14   | 0.96  | 0.001732627 | 2.76 | 0.043696226 |
| uc003ilj.4,uc003ilk.4,uc010iph.3                                                                                                                                     | NR3C2    | -1.28 | 0.001742163 | 2.76 | 0.043880028 |
| uc001rxb.3,uc010smv.1                                                                                                                                                | METTL7A  | 1.20  | 0.001748082 | 2.76 | 0.043972378 |
| uc001uyy.3                                                                                                                                                           | DNAJC15  | 1.02  | 0.001754033 | 2.76 | 0.044013848 |
| uc003wig.5,uc011kvc.2                                                                                                                                                | ATG9B    | -1.07 | 0.00175424  | 2.76 | 0.044013848 |
| uc002box.3,uc010uqb.2,uc010uqc.2                                                                                                                                     | IDH2     | 0.94  | 0.001763982 | 2.75 | 0.044201459 |
| uc002eek.1                                                                                                                                                           | C16orf87 | 1.08  | 0.00176917  | 2.75 | 0.044260705 |
| uc003zuw.1,uc003zux.1                                                                                                                                                | DCTN3    | 1.58  | 0.001770882 | 2.75 | 0.044260705 |
| uc001zue.3,uc001zuf.2,uc001zug.1,uc001zuh.1,uc001zui.1,uc010bdy.1                                                                                                    | TRIM69   | 1.02  | 0.001778197 | 2.75 | 0.044342739 |
| uc002prm.3,uc002prn.3,uc010ybo.2                                                                                                                                     | ZNF473   | -1.07 | 0.001778707 | 2.75 | 0.044342739 |
| uc003dtd.3,uc003dte.3,uc003dtf.1                                                                                                                                     | DCBLD2   | -4.37 | 0.001783514 | 2.75 | 0.044405869 |

|                                                                                                    |         |       |             |      |             |
|----------------------------------------------------------------------------------------------------|---------|-------|-------------|------|-------------|
| uc002muv.3                                                                                         | ASNA1   | 0.99  | 0.00179188  | 2.75 | 0.044557317 |
| uc001utf.2,uc010tdr.2                                                                              | ALOX5AP | 0.98  | 0.001798648 | 2.75 | 0.044664069 |
| uc003kns.3,uc003knt.3,uc003knu.3,uc003knv.3,uc003knw.3,uc003knx.1,uc003kny.1,uc003knz.3,uc011cuz.2 | PAM     | 0.99  | 0.001800749 | 2.74 | 0.044664069 |
| uc001pds.4,uc021qos.1                                                                              | SMCO4   | 3.07  | 0.001804967 | 2.74 | 0.044678851 |
| uc001fun.2,uc010piy.2,uc031pqt.1,uc031pqu.1                                                        | TAGLN2  | 1.05  | 0.001805923 | 2.74 | 0.044678851 |
| uc010eex.2,uc010xt.2                                                                               | ZFP14   | -1.07 | 0.001813655 | 2.74 | 0.044813344 |
| uc001cmg.4,uc001cmh.4,uc010olb.2,uc010olc.2                                                        | KIF2C   | 4.41  | 0.001816339 | 2.74 | 0.044822918 |

- 1
- 2
- 3
- 4
- 5
- 6
- 7
- 8
- 9
- 10
- 11
- 12
- 13
- 14
- 15
- 16
- 17
- 18
- 19
- 20
- 21
- 22
- 23
- 24

1 **Supplementary Table 3**, Gene modules up in Programmed cell death protein 1 (PD-1)<sup>high</sup> Tregs  
 2 from healthy donors. Differentially expressed genes that were up in PD-1<sup>high</sup> Tregs were analyzed  
 3 with DAVID to identify functional clusters of genes.

| Gene Group (Enrichment Score) | Official Gene Symbol | Gene Name                                                                                         |
|-------------------------------|----------------------|---------------------------------------------------------------------------------------------------|
| <b>Group 1 (15.955)</b>       | ESPL1                | extra spindle pole bodies homolog 1 ( <i>S. cerevisiae</i> )                                      |
|                               | MLF1IP               | MLF1 interacting protein                                                                          |
|                               | POLQ                 | polymerase (DNA directed), theta                                                                  |
|                               | CENPE                | centromere protein E, 312kDa                                                                      |
|                               | ANLN                 | anillin, actin binding protein                                                                    |
|                               | TUBB                 | tubulin, beta; similar to tubulin, beta 5; tubulin, beta pseudogene 2; tubulin, beta pseudogene 1 |
|                               | PRC1                 | protein regulator of cytokinesis 1                                                                |
|                               | PLK4                 | polo-like kinase 4 ( <i>Drosophila</i> )                                                          |
|                               | SMC4                 | structural maintenance of chromosomes 4                                                           |
|                               | DSCC1                | defective in sister chromatid cohesion 1 homolog ( <i>S. cerevisiae</i> )                         |
|                               | NCAPG2               | non-SMC condensin II complex, subunit G2                                                          |
|                               | GTSE1                | G-2 and S-phase expressed 1                                                                       |
|                               | BUB1                 | budding uninhibited by benzimidazoles 1 homolog (yeast)                                           |
|                               | CDCA5                | cell division cycle associated 5                                                                  |
|                               | SKA1                 | chromosome 18 open reading frame 24                                                               |
|                               | CDK1                 | cell division cycle 2, G1 to S and G2 to M                                                        |
|                               | CDCA2                | cell division cycle associated 2                                                                  |
|                               | SGOL1                | shugoshin-like 1 ( <i>S. pombe</i> )                                                              |
|                               | KIF18A               | kinesin family member 18A                                                                         |
|                               | KIFC1                | kinesin family member C1                                                                          |
|                               | KIF20A               | kinesin family member 20A                                                                         |
|                               | DCTN3                | dynactin 3 (p22)                                                                                  |
|                               | HAUS1                | HAUS augmin-like complex, subunit 1                                                               |
|                               | DLGAP5               | discs, large ( <i>Drosophila</i> ) homolog-associated protein 5                                   |
|                               | MYO1G                | myosin IG                                                                                         |
|                               | BUB1B                | budding uninhibited by benzimidazoles 1 homolog beta (yeast)                                      |
|                               | FGFR2                | fibroblast growth factor receptor 2                                                               |
|                               | KIF15                | kinesin family member 15                                                                          |
|                               | MCM2                 | minichromosome maintenance complex component 2                                                    |
|                               | KIF19                | kinesin family member 19                                                                          |
|                               | CDK14                | PFTAIRE protein kinase 1                                                                          |
| ZWINT                         | ZW10 interactor      |                                                                                                   |



|          |                                                                             |
|----------|-----------------------------------------------------------------------------|
| CASC5    | cancer susceptibility candidate 5                                           |
| RAD54L   | RAD54-like ( <i>S. cerevisiae</i> )                                         |
| STMN1    | stathmin 1                                                                  |
| NUF2     | NUF2, NDC80 kinetochore complex component, homolog ( <i>S. cerevisiae</i> ) |
| ASNA1    | arsA arsenite transporter, ATP-binding, homolog 1 (bacterial)               |
| NDC80    | NDC80 homolog, kinetochore complex component ( <i>S. cerevisiae</i> )       |
| PKMYT1   | protein kinase, membrane associated tyrosine/threonine 1                    |
| PMVK     | phosphomevalonate kinase                                                    |
| MKI67    | antigen identified by monoclonal antibody Ki-67                             |
| CENPF    | centromere protein F, 350/400ka (mitosin)                                   |
| CKAP2    | cytoskeleton associated protein 2                                           |
| KIF4A    | kinesin family member 4B; kinesin family member 4A                          |
| MAD2L1   | MAD2 mitotic arrest deficient-like 1 (yeast)                                |
| LTK      | leukocyte receptor tyrosine kinase                                          |
| UBE2C    | ubiquitin-conjugating enzyme E2C                                            |
| KIF14    | kinesin family member 14                                                    |
| NCAPH    | non-SMC condensin I complex, subunit H                                      |
| MCM6     | minichromosome maintenance complex component 6                              |
| TIMELESS | timeless homolog ( <i>Drosophila</i> )                                      |
| STK16    | serine/threonine kinase 16                                                  |
| PLK1     | polo-like kinase 1 ( <i>Drosophila</i> )                                    |
| CCNB2    | cyclin B2                                                                   |
| NEK2     | NIMA (never in mitosis gene a)-related kinase 2                             |
| RCC1     | regulator of chromosome condensation 1; SNHG3-RCC1 readthrough transcript   |
| KIF23    | kinesin family member 23                                                    |
| MYO1E    | myosin IE                                                                   |
| KIF11    | kinesin family member 11                                                    |
| CENPN    | centromere protein N                                                        |
| TTK      | TTK protein kinase                                                          |
| KIF2C    | kinesin family member 2C                                                    |
| AURKB    | aurora kinase B                                                             |
| SGOL2    | shugoshin-like 2 ( <i>S. pombe</i> )                                        |
| NCAPG    | non-SMC condensin I complex, subunit G                                      |
| CEP55    | centrosomal protein 55kDa                                                   |
| WEE1     | WEE1 homolog ( <i>S. pombe</i> )                                            |
| TK1      | thymidine kinase 1, soluble                                                 |
| MELK     | maternal embryonic leucine zipper kinase                                    |
| NUSAP1   | nucleolar and spindle associated protein 1                                  |

|                        |                                              |                                                                                                                                                                           |
|------------------------|----------------------------------------------|---------------------------------------------------------------------------------------------------------------------------------------------------------------------------|
|                        | MCM4                                         | minichromosome maintenance complex component 4                                                                                                                            |
|                        | TPX2                                         | TPX2, microtubule-associated, homolog ( <i>Xenopus laevis</i> )                                                                                                           |
|                        | SKA3                                         | chromosome 13 open reading frame 3                                                                                                                                        |
|                        | RAD51                                        | RAD51 homolog (RecA homolog, <i>E. coli</i> ) ( <i>S. cerevisiae</i> )                                                                                                    |
|                        | BIRC5                                        | baculoviral IAP repeat-containing 5                                                                                                                                       |
| <b>Group 2 (7.917)</b> | CDK1                                         | cell division cycle 2, G1 to S and G2 to M                                                                                                                                |
|                        | PSMB3                                        | proteasome (prosome, macropain) subunit, beta type, 3                                                                                                                     |
|                        | BUB1B                                        | budding uninhibited by benzimidazoles 1 homolog beta (yeast)                                                                                                              |
|                        | PSMA4                                        | proteasome (prosome, macropain) subunit, alpha type, 4                                                                                                                    |
|                        | PSMD14                                       | proteasome (prosome, macropain) 26S subunit, non-ATPase, 14                                                                                                               |
|                        | PSMD8                                        | proteasome (prosome, macropain) 26S subunit, non-ATPase, 8                                                                                                                |
|                        | PSMC4                                        | similar to 26S protease regulatory subunit 6B (MIP224) (MB67-interacting protein) (TAT-binding protein 7) (TBP-7); proteasome (prosome, macropain) 26S subunit, ATPase, 4 |
|                        | CCNB1                                        | cyclin B1                                                                                                                                                                 |
|                        | PSMA6                                        | proteasome (prosome, macropain) subunit, alpha type, 6                                                                                                                    |
|                        | UBE2C                                        | ubiquitin-conjugating enzyme E2C                                                                                                                                          |
|                        | PSMD9                                        | proteasome (prosome, macropain) 26S subunit, non-ATPase, 9                                                                                                                |
|                        | PSMC3                                        | proteasome (prosome, macropain) 26S subunit, ATPase, 3                                                                                                                    |
|                        | PSMA2                                        | proteasome (prosome, macropain) subunit, alpha type, 2                                                                                                                    |
|                        | PSME2                                        | proteasome (prosome, macropain) activator subunit 2 (PA28 beta)                                                                                                           |
|                        | CDC20                                        | cell division cycle 20 homolog ( <i>S. cerevisiae</i> )                                                                                                                   |
| MAD2L1                 | MAD2 mitotic arrest deficient-like 1 (yeast) |                                                                                                                                                                           |
| <b>Group 3 (6.670)</b> | CDC45                                        | CDC45 cell division cycle 45-like ( <i>S. cerevisiae</i> )                                                                                                                |
|                        | CLSPN                                        | claspin homolog ( <i>Xenopus laevis</i> )                                                                                                                                 |
|                        | GMNN                                         | geminin, DNA replication inhibitor                                                                                                                                        |
|                        | CDT1                                         | chromatin licensing and DNA replication factor 1                                                                                                                          |
| <b>Group 4 (5.832)</b> | HJURP                                        | Holliday junction recognition protein                                                                                                                                     |
|                        | CENPA                                        | centromere protein A                                                                                                                                                      |
|                        | H3F3A                                        | H3 histone, family 3B (H3.3B); H3 histone, family 3A pseudogene; H3 histone, family 3A; similar to H3 histone, family 3B; similar to histone H3.3B                        |
|                        | HMG2                                         | hypothetical LOC729505; similar to hCG2040565; high-mobility group nucleosomal binding domain 2; similar to high-mobility group nucleosomal binding domain 2              |
|                        | H2AFZ                                        | H2A histone family, member Z                                                                                                                                              |
|                        | MCM2                                         | minichromosome maintenance complex component 2                                                                                                                            |
|                        | HIST1H2BN                                    | histone cluster 1, H2bn                                                                                                                                                   |
|                        | HIST1H1B                                     | histone cluster 1, H1b                                                                                                                                                    |
|                        | H2AFY                                        | H2A histone family, member Y                                                                                                                                              |

|                        |           |                                                                                                                                                         |
|------------------------|-----------|---------------------------------------------------------------------------------------------------------------------------------------------------------|
|                        | HIST1H2BK | histone cluster 1, H2bk                                                                                                                                 |
|                        | ASF1B     | ASF1 anti-silencing function 1 homolog B ( <i>S. cerevisiae</i> )                                                                                       |
| <b>Group 5 (5.253)</b> | DUSP16    | dual specificity phosphatase 16                                                                                                                         |
|                        | CDC25C    | cell division cycle 25 homolog C ( <i>S. pombe</i> )                                                                                                    |
|                        | CDKN3     | cyclin-dependent kinase inhibitor 3                                                                                                                     |
|                        | DUSP6     | dual specificity phosphatase 6                                                                                                                          |
| <b>Group 6 (4.921)</b> | ARPC3     | similar to actin related protein 2/3 complex subunit 3; hypothetical LOC729841; actin related protein 2/3 complex, subunit 3, 21kDa                     |
|                        | CAPZB     | capping protein (actin filament) muscle Z-line, beta                                                                                                    |
|                        | ARPC2     | actin related protein 2/3 complex, subunit 2, 34kDa                                                                                                     |
|                        | CAPG      | capping protein (actin filament), gelsolin-like                                                                                                         |
|                        | ARPC1B    | actin related protein 2/3 complex, subunit 1B, 41kDa; similar to Actin-related protein 2/3 complex subunit 1B (ARP2/3 complex 41 kDa subunit) (p41-ARC) |
| <b>Group 7 (4.688)</b> | TFDP1     | transcription factor Dp-1                                                                                                                               |
|                        | E2F1      | E2F transcription factor 1                                                                                                                              |
|                        | SUB1      | SUB1 homolog ( <i>S. cerevisiae</i> )                                                                                                                   |
|                        | E2F8      | E2F transcription factor 8                                                                                                                              |
|                        | GTF3C6    | general transcription factor IIIC, polypeptide 6, alpha 35kDa                                                                                           |
|                        | E2F2      | E2F transcription factor 2                                                                                                                              |
| <b>Group 8 (3.754)</b> | BFSP1     | beaded filament structural protein 1, filensin                                                                                                          |
|                        | BFSP2     | beaded filament structural protein 2, phakinin                                                                                                          |
|                        | VIM       | vimentin                                                                                                                                                |
|                        | LMNB1     | lamin B1                                                                                                                                                |
| <b>Group 9 (2.269)</b> | TRIM69    | tripartite motif-containing 69                                                                                                                          |
|                        | LIMS3     | LIM and senescent cell antigen-like domains 3; LIMS3-LOC440895 read-through                                                                             |
|                        | CA8       | carbonic anhydrase VIII                                                                                                                                 |
|                        | CPPED1    | calcineurin-like phosphoesterase domain containing 1                                                                                                    |
|                        | APOBEC3F  | apolipoprotein B mRNA editing enzyme, catalytic polypeptide-like 3F                                                                                     |
|                        | MCM10     | minichromosome maintenance complex component 10                                                                                                         |
|                        | APOBEC3C  | apolipoprotein B mRNA editing enzyme, catalytic polypeptide-like 3C                                                                                     |
|                        | LAP3      | leucine aminopeptidase 3                                                                                                                                |
|                        | APOBEC3H  | apolipoprotein B mRNA editing enzyme, catalytic polypeptide-like 3H                                                                                     |
|                        | APOBEC3D  | apolipoprotein B mRNA editing enzyme, catalytic polypeptide-like 3D                                                                                     |
|                        | PHF19     | PHD finger protein 19                                                                                                                                   |
|                        | ZCRB1     | zinc finger CCHC-type and RNA binding motif 1                                                                                                           |
|                        | ETHE1     | ethylmalonic encephalopathy 1                                                                                                                           |

|                         |          |                                                                                                                                                                                                       |
|-------------------------|----------|-------------------------------------------------------------------------------------------------------------------------------------------------------------------------------------------------------|
|                         | ESCO2    | establishment of cohesion 1 homolog 2 ( <i>S. cerevisiae</i> )                                                                                                                                        |
|                         | DBF4     | DBF4 homolog ( <i>S. cerevisiae</i> )                                                                                                                                                                 |
|                         | DPP3     | dipeptidyl-peptidase 3                                                                                                                                                                                |
| <b>Group 10 (2.067)</b> | ETHE1    | ethylmalonic encephalopathy 1                                                                                                                                                                         |
|                         | MRPL10   | mitochondrial ribosomal protein L10                                                                                                                                                                   |
|                         | MRPL28   | mitochondrial ribosomal protein L28                                                                                                                                                                   |
|                         | MRPL47   | mitochondrial ribosomal protein L47                                                                                                                                                                   |
|                         | RPL39L   | ribosomal protein L39-like                                                                                                                                                                            |
| <b>Group 11 (2.019)</b> | ANXA1    | annexin A1                                                                                                                                                                                            |
|                         | ANXA4    | annexin A4                                                                                                                                                                                            |
|                         | ANXA2    | annexin A2 pseudogene 3; annexin A2; annexin A2 pseudogene 1                                                                                                                                          |
|                         | ANXA5    | annexin A5                                                                                                                                                                                            |
| <b>Group 12 (1.92)</b>  | PLEKHG3  | pleckstrin homology domain containing, family G (with RhoGef domain) member 3                                                                                                                         |
|                         | MCF2L2   | MCF.2 cell line derived transforming sequence-like 2                                                                                                                                                  |
|                         | TIAM2    | T-cell lymphoma invasion and metastasis 2                                                                                                                                                             |
|                         | ECT2     | epithelial cell transforming sequence 2 oncogene                                                                                                                                                      |
| <b>Group 13 (1.135)</b> | CORO1C   | coronin, actin binding protein, 1C                                                                                                                                                                    |
|                         | ARPC1B   | actin related protein 2/3 complex, subunit 1B, 41kDa; similar to Actin-related protein 2/3 complex subunit 1B (ARP2/3 complex 41 kDa subunit) (p41-ARC)                                               |
|                         | WSB2     | WD repeat and SOCS box-containing 2                                                                                                                                                                   |
|                         | DTL      | denticleless homolog ( <i>Drosophila</i> )                                                                                                                                                            |
|                         | WDR54    | WD repeat domain 54                                                                                                                                                                                   |
|                         |          |                                                                                                                                                                                                       |
| <b>Group 14 (0.982)</b> | GZMK     | granzyme K (granzyme 3; tryptase II)                                                                                                                                                                  |
|                         | PRCP     | prolylcarboxypeptidase (angiotensinase C)                                                                                                                                                             |
|                         | CTSH     | cathepsin H                                                                                                                                                                                           |
|                         | CTSB     | cathepsin B                                                                                                                                                                                           |
|                         | CTSA     | cathepsin A                                                                                                                                                                                           |
| <b>Group 15 (0.744)</b> | SLC25A5  | solute carrier family 25 (mitochondrial carrier; adenine nucleotide translocator), member 5; solute carrier family 25 (mitochondrial carrier; adenine nucleotide translocator), member 5 pseudogene 8 |
|                         | UCP2     | uncoupling protein 2 (mitochondrial, proton carrier)                                                                                                                                                  |
|                         | NDUFB3   | NADH dehydrogenase (ubiquinone) 1 beta subcomplex, 3, 12kDa                                                                                                                                           |
|                         | SLC25A20 | solute carrier family 25 (carnitine/acylcarnitine translocase), member 20                                                                                                                             |
| <b>Group 16 (0.715)</b> | CLIC1    | chloride intracellular channel 1                                                                                                                                                                      |
|                         | KCNJ15   | potassium inwardly-rectifying channel, subfamily J, member 15                                                                                                                                         |
|                         | KCNK5    | potassium channel, subfamily K, member 5                                                                                                                                                              |
|                         | CLIC3    | chloride intracellular channel 3                                                                                                                                                                      |

|                         |                |                                                                        |
|-------------------------|----------------|------------------------------------------------------------------------|
| <b>Group 17 (0.494)</b> | HOPX           | HOP homeobox                                                           |
|                         | PRDM1          | PR domain containing 1, with ZNF domain                                |
|                         | ZGPAT          | zinc finger, CCCH-type with G patch domain                             |
|                         | ZBTB32         | zinc finger and BTB domain containing 32                               |
|                         | ID2            | inhibitor of DNA binding 2, dominant negative helix-loop-helix protein |
|                         | MXD4           | MAX dimerization protein 4                                             |
| <b>Group 18 (0.138)</b> | TMEM14C        | transmembrane protein 14C                                              |
|                         | ORMDL3         | ORM1-like 3 ( <i>S. cerevisiae</i> )                                   |
|                         | ITM2A          | integral membrane protein 2A                                           |
|                         | LAG3           | lymphocyte-activation gene 3                                           |
|                         | GPR137B        | G protein-coupled receptor 137B                                        |
|                         | GPR15          | G protein-coupled receptor 15                                          |
|                         | EVC2           | Ellis van Creveld syndrome 2                                           |
|                         | FAM174B        | family with sequence similarity 174, member B                          |
|                         | PAQR4          | progesterone and adipoQ receptor family member IV                      |
|                         | KLRB1          | killer cell lectin-like receptor subfamily B, member 1                 |
|                         | FUT7           | fucosyltransferase 7 (alpha (1,3) fucosyltransferase)                  |
|                         | CD200          | CD200 molecule                                                         |
|                         | NPDC1          | neural proliferation, differentiation and control, 1                   |
|                         | NMUR1          | neuromedin U receptor 1                                                |
|                         | HAVCR2         | hepatitis A virus cellular receptor 2                                  |
|                         | CXCR3          | chemokine (C-X-C motif) receptor 3                                     |
|                         | MS4A1          | membrane-spanning 4-domains, subfamily A, member 1                     |
|                         | NKG7           | natural killer cell group 7 sequence                                   |
|                         | SLAMF1         | signaling lymphocytic activation molecule family member 1              |
|                         | PDCD1          | programmed cell death 1                                                |
|                         | CCR5           | chemokine (C-C motif) receptor 5                                       |
|                         | DNAJC15        | DnaJ (Hsp40) homolog, subfamily C, member 15                           |
|                         | CXCR6          | chemokine (C-X-C motif) receptor 6                                     |
|                         | VANGL1         | vang-like 1 (van gogh, <i>Drosophila</i> )                             |
|                         | GPR25          | G protein-coupled receptor 25                                          |
|                         | TNFRSF18       | tumor necrosis factor receptor superfamily, member 18                  |
|                         | CD2            | CD2 molecule                                                           |
|                         | SPPL2A         | signal peptide peptidase-like 2A                                       |
|                         | DPY19L1        | dpy-19-like 1 ( <i>C. elegans</i> ); similar to hCG1645499             |
|                         | KIAA1324       | KIAA1324                                                               |
|                         | CD79B          | CD79b molecule, immunoglobulin-associated beta                         |
|                         | TSPAN5         | tetraspanin 5                                                          |
| CD226                   | CD226 molecule |                                                                        |

|  |          |                                                                                          |
|--|----------|------------------------------------------------------------------------------------------|
|  | HIGD2A   | HIG1 hypoxia inducible domain family, member 2A                                          |
|  | CLDND1   | claudin domain containing 1                                                              |
|  | GCNT1    | glucosaminyl (N-acetyl) transferase 1, core 2 (beta-1,6-N-acetylglucosaminyltransferase) |
|  | MCAM     | melanoma cell adhesion molecule                                                          |
|  | CCDC107  | coiled-coil domain containing 107                                                        |
|  | CALHM2   | calcium homeostasis modulator 2                                                          |
|  | KCNK5    | potassium channel, subfamily K, member 5                                                 |
|  | CD58     | CD58 molecule                                                                            |
|  | PDCD1LG2 | programmed cell death 1 ligand 2                                                         |
|  | MS4A6A   | membrane-spanning 4-domains, subfamily A, member 6A                                      |
|  | CX3CR1   | chemokine (C-X3-C motif) receptor 1                                                      |
|  | EMP3     | epithelial membrane protein 3                                                            |
|  | GPR183   | G protein-coupled receptor 183                                                           |
|  | TSPAN2   | tetraspanin 2                                                                            |
|  | CD84     | CD84 molecule                                                                            |
|  | SLC29A1  | solute carrier family 29 (nucleoside transporters), member 1                             |
|  | CCR6     | cyclin L2; chemokine (C-C motif) receptor 6                                              |
|  | CD82     | CD82 molecule                                                                            |
|  | CD99     | CD99 molecule                                                                            |

1  
2  
3  
4  
5  
6  
7  
8  
9  
10  
11  
12  
13  
14  
15  
16

1  
2 **Supplementary Table 4**, Gene modules down in Programmed cell death protein 1 (PD-1)<sup>high</sup>  
3 Tregs from healthy donors. Differentially expressed genes that were down in PD-1<sup>high</sup> Tregs were  
4 analyzed with DAVID to identify functional clusters of genes.

| Gene Group (Enrichment Score) | Official Gene Symbol                                              | Gene Name                                       |
|-------------------------------|-------------------------------------------------------------------|-------------------------------------------------|
| <b>Group 1 (7.483)</b>        | ZNF516                                                            | zinc finger protein 516                         |
|                               | SATB1                                                             | SATB homeobox 1                                 |
|                               | ZNF506                                                            | zinc finger protein 506                         |
|                               | ZNF772                                                            | zinc finger protein 772                         |
|                               | ZSCAN18                                                           | zinc finger and SCAN domain containing 18       |
|                               | ZBTB33                                                            | zinc finger and BTB domain containing 33        |
|                               | ZNF844                                                            | zinc finger protein 844                         |
|                               | ZNF204P                                                           | zinc finger protein 204 pseudogene              |
|                               | ZNF616                                                            | zinc finger protein 616                         |
|                               | NAPEPLD                                                           | N-acyl phosphatidylethanolamine phospholipase D |
|                               | ZHX3                                                              | zinc fingers and homeoboxes 3                   |
|                               | ZFP112                                                            | zinc finger protein 112 homolog (mouse)         |
|                               | ZNF836                                                            | zinc finger protein 836                         |
|                               | NKRF                                                              | NFKB repressing factor                          |
|                               | ZFP14                                                             | zinc finger protein 14 homolog (mouse)          |
|                               | ZNF652                                                            | zinc finger protein 652                         |
|                               | ZNF496                                                            | zinc finger protein 496                         |
|                               | RNF175                                                            | ring finger protein 175                         |
|                               | ZNF347                                                            | zinc finger protein 347                         |
|                               | ZNF337                                                            | zinc finger protein 337                         |
|                               | ZNF813                                                            | zinc finger protein 813                         |
|                               | ZC3H12B                                                           | zinc finger CCCH-type containing 12B            |
|                               | RNF144A                                                           | ring finger protein 144A                        |
|                               | ZBTB4                                                             | zinc finger and BTB domain containing 4         |
|                               | ZNF398                                                            | zinc finger protein 398                         |
|                               | ZNF548                                                            | zinc finger protein 548                         |
|                               | ZNF518B                                                           | zinc finger protein 518B                        |
|                               | ZNF585B                                                           | zinc finger protein 585B                        |
|                               | ZNF808                                                            | zinc finger protein 808                         |
|                               | PLAG1                                                             | pleiomorphic adenoma gene 1                     |
|                               | ZNF300                                                            | zinc finger protein 300                         |
|                               | ZFP3                                                              | zinc finger protein 3 homolog (mouse)           |
| PA2G4P4                       | proliferation-associated 2G4, 38kDa; proliferation-associated 2G4 |                                                 |

|                        |         |                                                                                 |
|------------------------|---------|---------------------------------------------------------------------------------|
|                        |         | pseudogene 4                                                                    |
|                        | ZNF101  | zinc finger protein 101                                                         |
|                        | NR3C2   | nuclear receptor subfamily 3, group C, member 2                                 |
|                        | RNF130  | ring finger protein 130                                                         |
|                        | ZNF550  | zinc finger protein 550                                                         |
|                        | ZC3H10  | zinc finger CCCH-type containing 10                                             |
|                        | NR2C2   | nuclear receptor subfamily 2, group C, member 2                                 |
|                        | ZNF607  | zinc finger protein 607                                                         |
|                        | HIVEP1  | human immunodeficiency virus type I enhancer binding protein 1                  |
|                        | KLF7    | Kruppel-like factor 7 (ubiquitous)                                              |
|                        | ZNF324  | zinc finger protein 324                                                         |
|                        | SH3RF3  | SH3 domain containing ring finger 3                                             |
|                        | ZNF473  | zinc finger protein 473                                                         |
|                        | ZNF248  | zinc finger protein 248                                                         |
|                        | ZC4H2   | zinc finger, C4H2 domain containing                                             |
|                        | ZCCHC14 | zinc finger, CCHC domain containing 14                                          |
|                        | ZNF433  | zinc finger protein 433                                                         |
|                        | ZKSCAN2 | zinc finger with KRAB and SCAN domains 2                                        |
|                        | ZNF416  | zinc finger protein 416                                                         |
|                        | ZNF354C | zinc finger protein 354C                                                        |
| <b>Group 2 (4.99)</b>  | ZSCAN18 | zinc finger and SCAN domain containing 18                                       |
|                        | SCML1   | sex comb on midleg-like 1 (Drosophila)                                          |
|                        | BACH2   | BTB and CNC homology 1, basic leucine zipper transcription factor 2             |
|                        | MGA     | MAX gene associated                                                             |
|                        | AFF3    | AF4/FMR2 family, member 3                                                       |
|                        | POU6F1  | POU class 6 homeobox 1                                                          |
| <b>Group 3 (2.105)</b> | WDR89   | WD repeat domain 89                                                             |
|                        | TLE4    | transducin-like enhancer of split 4 (E(sp1) homolog, Drosophila)                |
|                        | NBEA    | neurobeachin                                                                    |
|                        | TLE2    | transducin-like enhancer of split 2 (E(sp1) homolog, Drosophila)                |
| <b>Group 4 (1.927)</b> | PDIK1L  | PDLIM1 interacting kinase 1 like                                                |
|                        | RYK     | RYK receptor-like tyrosine kinase                                               |
|                        | IGF1R   | insulin-like growth factor 1 receptor                                           |
|                        | RPS6KA2 | ribosomal protein S6 kinase, 90kDa, polypeptide 2; hypothetical<br>LOC100127984 |
|                        | NUAK2   | NUAK family, SNF1-like kinase, 2                                                |
|                        | KALRN   | kalirin, RhoGEF kinase                                                          |
|                        | TXK     | TXK tyrosine kinase                                                             |
|                        | PKD1    | pyruvate dehydrogenase kinase, isozyme 1                                        |
|                        | TNK1    | tyrosine kinase, non-receptor, 1                                                |



|                        |                                        |                                                                                                               |
|------------------------|----------------------------------------|---------------------------------------------------------------------------------------------------------------|
|                        | TGFBR2                                 | transforming growth factor, beta receptor II (70/80kDa)                                                       |
|                        | PAN3                                   | PAN3 poly(A) specific ribonuclease subunit homolog (S. cerevisiae)                                            |
|                        | ACVR1C                                 | activin A receptor, type IC                                                                                   |
|                        | TGFBR1                                 | transforming growth factor, beta receptor 1                                                                   |
|                        | YES1                                   | v-yes-1 Yamaguchi sarcoma viral oncogene homolog 1                                                            |
|                        | EPHA1                                  | EPH receptor A1                                                                                               |
|                        | CAMK4                                  | calcium/calmodulin-dependent protein kinase IV                                                                |
|                        | PRKD3                                  | protein kinase D3                                                                                             |
| <b>Group 5 (0.991)</b> | TNFRSF10D                              | tumor necrosis factor receptor superfamily, member 10d, decoy with truncated death domain                     |
|                        | AMIGO2                                 | adhesion molecule with Ig-like domain 2                                                                       |
|                        | AJAP1                                  | adherens junctions associated protein 1                                                                       |
|                        | PLXDC1                                 | plexin domain containing 1                                                                                    |
|                        | GAL3ST4                                | galactose-3-O-sulfotransferase 4                                                                              |
|                        | TMEM220                                | transmembrane protein 220                                                                                     |
|                        | JAM3                                   | junctional adhesion molecule 3                                                                                |
|                        | DCBLD2                                 | discoidin, CUB and LCCL domain containing 2                                                                   |
|                        | TSPAN33                                | tetraspanin 33                                                                                                |
|                        | CCR7                                   | chemokine (C-C motif) receptor 7                                                                              |
|                        | LNPEP                                  | leucyl/cystinyl aminopeptidase                                                                                |
|                        | GPR160                                 | G protein-coupled receptor 160                                                                                |
|                        | ST6GALNAC3                             | ST6 (alpha-N-acetyl-neuraminyl-2,3-beta-galactosyl-1,3)-N-acetylgalactosaminide alpha-2,6-sialyltransferase 3 |
|                        | NPTXR                                  | neuronal pentraxin receptor                                                                                   |
|                        | GPA33                                  | glycoprotein A33 (transmembrane)                                                                              |
|                        | SLC7A6                                 | solute carrier family 7 (cationic amino acid transporter, y+ system), member 6                                |
|                        | LMF1                                   | lipase maturation factor 1                                                                                    |
|                        | SLC24A6                                | solute carrier family 24 (sodium/potassium/calcium exchanger), member 6                                       |
|                        | MPZL1                                  | myelin protein zero-like 1                                                                                    |
|                        | CDCP1                                  | CUB domain containing protein 1                                                                               |
|                        | SLC29A2                                | solute carrier family 29 (nucleoside transporters), member 2                                                  |
|                        | NRCAM                                  | neuronal cell adhesion molecule                                                                               |
|                        | C10orf105                              | chromosome 10 open reading frame 105                                                                          |
|                        | SLC2A6                                 | solute carrier family 2 (facilitated glucose transporter), member 6                                           |
|                        | PECAM1                                 | platelet/endothelial cell adhesion molecule                                                                   |
|                        | ROBO3                                  | roundabout, axon guidance receptor, homolog 3 (Drosophila)                                                    |
| LAPTM4B                | lysosomal protein transmembrane 4 beta |                                                                                                               |
| RNF130                 | ring finger protein 130                |                                                                                                               |

|                        |          |                                                                                          |
|------------------------|----------|------------------------------------------------------------------------------------------|
|                        | SLC22A17 | solute carrier family 22, member 17                                                      |
|                        | PTPRO    | protein tyrosine phosphatase, receptor type, O                                           |
|                        | CEACAM4  | carcinoembryonic antigen-related cell adhesion molecule 4                                |
|                        | ALG10B   | asparagine-linked glycosylation 10, alpha-1,2-glucosyltransferase homolog B (yeast)      |
|                        | SLC46A1  | solute carrier family 46 (folate transporter), member 1                                  |
|                        | MAN1C1   | mannosidase, alpha, class 1C, member 1                                                   |
|                        | F2RL1    | coagulation factor II (thrombin) receptor-like 1                                         |
|                        | GCNT4    | glucosaminyl (N-acetyl) transferase 4, core 2 (beta-1,6-N-acetylglucosaminyltransferase) |
|                        | ENTPD6   | ectonucleoside triphosphate diphosphohydrolase 6 (putative function)                     |
|                        | GPR162   | G protein-coupled receptor 162                                                           |
|                        | TMEM30B  | transmembrane protein 30B                                                                |
|                        | SNN      | stannin                                                                                  |
| <b>Group 6 (0.697)</b> | TANC2    | tetratricopeptide repeat, ankyrin repeat and coiled-coil containing 2                    |
|                        | ANKS6    | ankyrin repeat and sterile alpha motif domain containing 6                               |
|                        | ASB13    | ankyrin repeat and SOCS box-containing 13                                                |
|                        | BTBD11   | BTB (POZ) domain containing 11                                                           |

1  
2  
3  
4  
5  
6  
7  
8  
9  
10  
11  
12  
13  
14  
15  
16  
17

1 **Supplementary Table 5**, Gene set enrichment analysis for Programmed cell death protein 1 (PD-  
2 1)<sup>high</sup> Tregs (FDR<0.05) from healthy donors, C2CP gene set database. Gene sets were  
3 categorized into the following groups: cell cycle/ proliferation (yellow), immune system /  
4 signaling (teal), metabolism (orange), and other (light blue). Gene set names in bold were chosen  
5 as representative examples in Figure 2D.

| Category                                   | Name                                                          | Size  | ES    | NES   | NOM p-val | FDR q-val | FWER p-val |
|--------------------------------------------|---------------------------------------------------------------|-------|-------|-------|-----------|-----------|------------|
| Other                                      | BIOCARTA_ACTINY_PATHWAY                                       | 20    | 0.432 | 2.268 | 0.000     | 0.004     | 0.307      |
|                                            | KEGG_OLFACTORY_TRANSDUCTION                                   | 377   | 0.307 | 6.991 | 0.000     | 0.000     | 0.000      |
|                                            | KEGG_PARKINSONS_DISEASE                                       | 111   | 0.475 | 5.831 | 0.000     | 0.000     | 0.000      |
|                                            | KEGG_ALZHEIMERS_DISEASE                                       | 155   | 0.366 | 5.391 | 0.000     | 0.000     | 0.000      |
|                                            | KEGG_HUNTINGTONS_DISEASE                                      | 170   | 0.326 | 5.011 | 0.000     | 0.000     | 0.000      |
|                                            | KEGG_PROTEASOME                                               | 44    | 0.567 | 4.440 | 0.000     | 0.000     | 0.000      |
|                                            | KEGG_SYSTEMIC_LUPUS_ERYTHEMATOSUS                             | 123   | 0.341 | 4.396 | 0.000     | 0.000     | 0.000      |
|                                            | REACTOME_DESTABILIZATION_OF_MRNA_BY_AUFI_HNRNP_D0             | 50    | 0.512 | 4.224 | 0.000     | 0.000     | 0.000      |
|                                            | REACTOME_HIV_INFECTION                                        | 187   | 0.241 | 3.828 | 0.000     | 0.000     | 0.000      |
|                                            | REACTOME_INFLUENZA_VIRAL_RNA_TRANSCRIPTION_AND_REPLICATION    | 99    | 0.325 | 3.807 | 0.000     | 0.000     | 0.000      |
|                                            | KEGG_ALLOGRAFT_REJECTION                                      | 33    | 0.544 | 3.715 | 0.000     | 0.000     | 0.000      |
|                                            | REACTOME_PREFOLDIN_MEDIATED_TRANSFER_OF_SUBSTRATE_TO_CCT_TRIC | 27    | 0.584 | 3.656 | 0.000     | 0.000     | 0.000      |
|                                            | KEGG_NEUROACTIVE_LIGAND_RECEPTOR_INTERACTION                  | 267   | 0.190 | 3.574 | 0.000     | 0.000     | 0.000      |
|                                            | REACTOME_HOST_INTERACTIONS_OF_HIV_FACTORS                     | 118   | 0.279 | 3.535 | 0.000     | 0.000     | 0.000      |
|                                            | KEGG_TYPE_I_DIABETES_MELLITUS                                 | 38    | 0.490 | 3.533 | 0.000     | 0.000     | 0.000      |
|                                            | KEGG_PATHOGENIC_ESCHERICHIA_COLI_INFECTION                    | 55    | 0.401 | 3.453 | 0.000     | 0.000     | 0.000      |
|                                            | REACTOME_HEMOSTASIS                                           | 443   | 0.136 | 3.405 | 0.000     | 0.000     | 0.000      |
|                                            | REACTOME_AMYLOIDS                                             | 73    | 0.327 | 3.303 | 0.000     | 0.000     | 0.000      |
|                                            | BIOCARTA_MPR_PATHWAY                                          | 33    | 0.483 | 3.234 | 0.000     | 0.000     | 0.000      |
|                                            | REACTOME_INFLUENZA_LIFE_CYCLE                                 | 132   | 0.235 | 3.130 | 0.000     | 0.000     | 0.000      |
|                                            | NABA_CORE_MATRISOME                                           | 274   | 0.164 | 3.106 | 0.000     | 0.000     | 0.000      |
| KEGG_LEISHMANIA_INFECTION                  | 67                                                            | 0.318 | 3.087 | 0.000 | 0.000     | 0.000     |            |
| REACTOME_CLASS_A1_RHODOPSIN_LIKE_RECEPTORS | 290                                                           | 0.152 | 3.010 | 0.000 | 0.000     | 0.001     |            |
| KEGG_VIRAL_MYOCARDITIS                     | 65                                                            | 0.312 | 2.962 | 0.000 | 0.000     | 0.001     |            |

|                                                                                |     |       |       |       |       |       |
|--------------------------------------------------------------------------------|-----|-------|-------|-------|-------|-------|
| KEGG_GRAFT_VERSUS_HOST_DISEASE                                                 | 32  | 0.416 | 2.825 | 0.000 | 0.000 | 0.003 |
| NABA_SECRETED_FACTORS                                                          | 335 | 0.130 | 2.778 | 0.000 | 0.000 | 0.006 |
| NABA_ECM_GLYCOPROTEINS                                                         | 195 | 0.154 | 2.487 | 0.002 | 0.001 | 0.073 |
| BIOCARTA_CDC42RAC_PATHWAY                                                      | 15  | 0.515 | 2.435 | 0.000 | 0.001 | 0.101 |
| REACTOME_DEVELOPMENTAL_BIOLOGY                                                 | 382 | 0.108 | 2.407 | 0.000 | 0.002 | 0.128 |
| KEGG_GAP_JUNCTION                                                              | 86  | 0.222 | 2.402 | 0.000 | 0.002 | 0.128 |
| REACTOME_PEPTIDE_LIGAND_BINDING_RECEPTORS                                      | 180 | 0.152 | 2.345 | 0.000 | 0.003 | 0.196 |
| KEGG_AUTOIMMUNE_THYROID_DISEASE                                                | 48  | 0.284 | 2.326 | 0.000 | 0.003 | 0.219 |
| KEGG_CELL_ADHESION_MOLECULES_CAMS                                              | 128 | 0.173 | 2.316 | 0.000 | 0.003 | 0.225 |
| REACTOME_BASIGIN_INTERACTIONS                                                  | 23  | 0.392 | 2.292 | 0.000 | 0.003 | 0.253 |
| KEGG_ASTHMA                                                                    | 27  | 0.375 | 2.287 | 0.000 | 0.003 | 0.264 |
| REACTOME_L1CAM_INTERACTIONS                                                    | 84  | 0.205 | 2.280 | 0.000 | 0.004 | 0.285 |
| NABA_ECM_REGULATORS                                                            | 226 | 0.128 | 2.272 | 0.002 | 0.004 | 0.301 |
| REACTOME_ENOS_ACTIVATION_AND_REGULATION                                        | 18  | 0.445 | 2.258 | 0.000 | 0.004 | 0.330 |
| REACTOME_RESPONSE_TO_ELEVATED_PLATELET_CYTOSOLIC_CA2_                          | 80  | 0.208 | 2.209 | 0.000 | 0.006 | 0.434 |
| REACTOME_AXON_GUIDANCE                                                         | 242 | 0.122 | 2.190 | 0.002 | 0.006 | 0.472 |
| KEGG_TIGHT_JUNCTION                                                            | 129 | 0.162 | 2.167 | 0.000 | 0.008 | 0.537 |
| REACTOME_KINESINS                                                              | 24  | 0.367 | 2.155 | 0.002 | 0.008 | 0.565 |
| KEGG_CARDIAC_MUSCLE_CONTRACTION                                                | 73  | 0.212 | 2.150 | 0.000 | 0.008 | 0.579 |
| SIG_PIP3_SIGNALING_IN_CARDIAC_MYOCYTES                                         | 67  | 0.216 | 2.104 | 0.004 | 0.011 | 0.672 |
| BIOCARTA_MTA3_PATHWAY                                                          | 19  | 0.401 | 2.093 | 0.006 | 0.012 | 0.704 |
| REACTOME_GENERATION_OF_SECOND_MESSENGER_MOLECULES                              | 25  | 0.353 | 2.090 | 0.000 | 0.012 | 0.714 |
| REACTOME_DARPP_32_EVENTS                                                       | 23  | 0.361 | 2.070 | 0.006 | 0.013 | 0.761 |
| KEGG_BLADDER_CANCER                                                            | 42  | 0.271 | 2.049 | 0.006 | 0.015 | 0.804 |
| REACTOME_MRNA_SPLICING_MINOR_PATHWAY                                           | 42  | 0.267 | 2.034 | 0.006 | 0.016 | 0.839 |
| BIOCARTA_MCALPAIN_PATHWAY                                                      | 24  | 0.341 | 2.020 | 0.006 | 0.017 | 0.860 |
| KEGG_EPITHELIAL_CELL_SIGNALING_IN_HELICOBACTER_PYLORI_INFECTION                | 68  | 0.204 | 2.020 | 0.002 | 0.017 | 0.860 |
| REACTOME_FACTORS_INVOLVED_IN_MEGAKARYOCYTE_DEVELOPMENT_AND_PLATELET_PRODUCTION | 123 | 0.155 | 2.006 | 0.008 | 0.018 | 0.873 |
| BIOCARTA_FMLP_PATHWAY                                                          | 36  | 0.283 | 1.997 | 0.004 | 0.018 | 0.891 |
| REACTOME_TRANSCRIPTION_COUPLED_N                                               | 43  | 0.258 | 1.985 | 0.010 | 0.020 | 0.908 |

|                                                                                                                           |                                                          |                                                    |       |       |       |       |       |
|---------------------------------------------------------------------------------------------------------------------------|----------------------------------------------------------|----------------------------------------------------|-------|-------|-------|-------|-------|
|                                                                                                                           | ER_TC_NER                                                |                                                    |       |       |       |       |       |
|                                                                                                                           | REACTOME_PROCESSING_OF_CAPPED_INTRON_CONTAINING_PRE_MRNA | 131                                                | 0.151 | 1.983 | 0.014 | 0.020 | 0.912 |
|                                                                                                                           | REACTOME_SMOOTH_MUSCLE_CONTRACTION                       | 23                                                 | 0.340 | 1.947 | 0.000 | 0.024 | 0.948 |
|                                                                                                                           | BIOCARTA_P53_PATHWAY                                     | 16                                                 | 0.407 | 1.944 | 0.008 | 0.024 | 0.954 |
|                                                                                                                           | BIOCARTA_ERK_PATHWAY                                     | 27                                                 | 0.319 | 1.940 | 0.008 | 0.024 | 0.954 |
|                                                                                                                           | ST_PHOSPHOINOSITIDE_3_KINASE_PATHWAY                     | 35                                                 | 0.270 | 1.923 | 0.006 | 0.027 | 0.964 |
|                                                                                                                           | REACTOME_FANCONI_ANEMIA_PATHWAY                          | 21                                                 | 0.351 | 1.918 | 0.018 | 0.027 | 0.966 |
|                                                                                                                           | BIOCARTA_CHREBP2_PATHWAY                                 | 40                                                 | 0.255 | 1.902 | 0.008 | 0.030 | 0.978 |
|                                                                                                                           | REACTOME_SIGNALLING_TO_P38_VIA_RIT_AND_RIN               | 15                                                 | 0.398 | 1.894 | 0.002 | 0.031 | 0.981 |
|                                                                                                                           | REACTOME_CELL_SURFACE_INTERACTIONS_AT_THE_VASCULAR_WALL  | 83                                                 | 0.179 | 1.892 | 0.010 | 0.031 | 0.982 |
|                                                                                                                           | KEGG_MAPK_SIGNALING_PATHWAY                              | 258                                                | 0.099 | 1.877 | 0.010 | 0.034 | 0.991 |
|                                                                                                                           | REACTOME_GLOBAL_GENOMIC_NER_GG_NER                       | 32                                                 | 0.276 | 1.859 | 0.006 | 0.036 | 0.994 |
|                                                                                                                           | BIOCARTA_RHO_PATHWAY                                     | 32                                                 | 0.282 | 1.846 | 0.012 | 0.038 | 0.997 |
|                                                                                                                           | BIOCARTA_GCR_PATHWAY                                     | 19                                                 | 0.352 | 1.843 | 0.014 | 0.039 | 0.998 |
|                                                                                                                           | REACTOME_CYTOSOLIC_TRNA_AMINOACYLATION                   | 23                                                 | 0.318 | 1.821 | 0.010 | 0.042 | 1.000 |
|                                                                                                                           | REACTOME_LIGAND_GATED_ION_CHANNEL_TRANSPORT              | 21                                                 | 0.330 | 1.815 | 0.016 | 0.044 | 1.000 |
|                                                                                                                           | BIOCARTA_HSP27_PATHWAY                                   | 15                                                 | 0.382 | 1.809 | 0.024 | 0.044 | 1.000 |
|                                                                                                                           | KEGG_MELANOMA                                            | 69                                                 | 0.183 | 1.807 | 0.015 | 0.045 | 1.000 |
|                                                                                                                           | KEGG_PROTEIN_EXPORT                                      | 23                                                 | 0.305 | 1.791 | 0.018 | 0.048 | 1.000 |
|                                                                                                                           | Metabolism                                               | REACTOME_REGULATION_OF_ORNITHINE_DECARBOXYLASE_ODC | 48    | 0.577 | 4.729 | 0.000 | 0.000 |
| BIOCARTA_PPARA_PATHWAY                                                                                                    |                                                          | 54                                                 | 0.239 | 2.025 | 0.006 | 0.017 | 0.850 |
| REACTOME_RESPIRATORY_ELECTRON_TRANSPORT_ATP_SYNTHESIS_BY_CHEMIOSMOTIC_COUPLING_AND_HEAT_PRODUCTION_BY_UNCOUPLING_PROTEINS |                                                          | 78                                                 | 0.596 | 6.218 | 0.000 | 0.000 | 0.000 |
| REACTOME_TCA_CYCLE_AND_RESPIRATORY_ELECTRON_TRANSPORT                                                                     |                                                          | 114                                                | 0.481 | 5.936 | 0.000 | 0.000 | 0.000 |
| REACTOME_RESPIRATORY_ELECTRON_TRANSPORT                                                                                   |                                                          | 64                                                 | 0.625 | 5.837 | 0.000 | 0.000 | 0.000 |
| KEGG_OXIDATIVE_PHOSPHORYLATION                                                                                            |                                                          | 114                                                | 0.438 | 5.534 | 0.000 | 0.000 | 0.000 |
|                                                                                                                           |                                                          |                                                    |       |       |       |       |       |

|                                                                |     |       |       |       |       |       |
|----------------------------------------------------------------|-----|-------|-------|-------|-------|-------|
| REACTOME_METABOLISM_OF_AMINO_ACIDS_AND_DERIVATIVES             | 194 | 0.222 | 3.594 | 0.000 | 0.000 | 0.000 |
| REACTOME_METABOLISM_OF_RNA                                     | 247 | 0.186 | 3.363 | 0.000 | 0.000 | 0.000 |
| REACTOME_METABOLISM_OF_NUCLEOTIDES                             | 67  | 0.251 | 2.429 | 0.000 | 0.001 | 0.106 |
| REACTOME_GLUCOSE_METABOLISM                                    | 61  | 0.251 | 2.289 | 0.000 | 0.003 | 0.260 |
| KEGG_GLYCINE_SERINE_AND_THREONINE_METABOLISM                   | 31  | 0.348 | 2.262 | 0.002 | 0.004 | 0.325 |
| KEGG_GLYOXYLATE_AND_DICARBOXYLATE_METABOLISM                   | 16  | 0.444 | 2.119 | 0.006 | 0.010 | 0.642 |
| REACTOME_AMINE_LIGAND_BINDING_RECEPTORS                        | 37  | 0.280 | 2.011 | 0.004 | 0.018 | 0.868 |
| REACTOME_METABOLISM_OF_PROTEINS                                | 418 | 0.189 | 4.427 | 0.000 | 0.000 | 0.000 |
| REACTOME_METABOLISM_OF_MRNA                                    | 204 | 0.220 | 3.599 | 0.000 | 0.000 | 0.000 |
| REACTOME_MITOCHONDRIAL_PROTEIN_IMPORT                          | 48  | 0.410 | 3.394 | 0.000 | 0.000 | 0.000 |
| KEGG_TERPENOID_BACKBONE_BIOSYNTHESIS                           | 15  | 0.635 | 2.978 | 0.000 | 0.000 | 0.001 |
| KEGG_CITRATE_CYCLE_TCA_CYCLE                                   | 30  | 0.442 | 2.947 | 0.000 | 0.000 | 0.001 |
| KEGG_VALINE_LEUCINE_AND_ISOLEUCINE_DEGRADATION                 | 43  | 0.348 | 2.735 | 0.000 | 0.000 | 0.008 |
| REACTOME_CITRIC_ACID_CYCLE_TCA_CYCLE                           | 19  | 0.516 | 2.668 | 0.000 | 0.000 | 0.011 |
| KEGG_PEROXISOME                                                | 76  | 0.234 | 2.389 | 0.000 | 0.002 | 0.142 |
| REACTOME_PYRUVATE_METABOLISM_AND_CITRIC_ACID_TCA_CYCLE         | 40  | 0.289 | 2.209 | 0.002 | 0.006 | 0.433 |
| REACTOME_METABOLISM_OF_CARBOHYDRATES                           | 229 | 0.120 | 2.100 | 0.000 | 0.011 | 0.689 |
| REACTOME_PEROXISOMAL_LIPID_METABOLISM                          | 20  | 0.390 | 2.089 | 0.006 | 0.012 | 0.715 |
| REACTOME_GLUCONEOGENESIS                                       | 29  | 0.321 | 2.026 | 0.006 | 0.017 | 0.850 |
| REACTOME_CHOLESTEROL_BIOSYNTHESIS                              | 21  | 0.364 | 2.009 | 0.004 | 0.018 | 0.871 |
| KEGG_PYRIMIDINE_METABOLISM                                     | 93  | 0.176 | 1.955 | 0.006 | 0.023 | 0.943 |
| REACTOME_FATTY_ACID_TRIACYLGLYCEROL_AND_KETONE_BODY_METABOLISM | 165 | 0.130 | 1.954 | 0.008 | 0.023 | 0.943 |
| REACTOME_METABOLISM_OF_LIPIDS_AND_LIPOPROTEINS                 | 462 | 0.078 | 1.914 | 0.014 | 0.028 | 0.967 |
| REACTOME_GLYCOLYSIS                                            | 26  | 0.303 | 1.849 | 0.016 | 0.038 | 0.995 |
| KEGG_ONE_CARBON_POOL_BY_FOLATE                                 | 17  | 0.369 | 1.844 | 0.010 | 0.039 | 0.998 |

|                                 |                                                                     |       |       |       |       |       |       |
|---------------------------------|---------------------------------------------------------------------|-------|-------|-------|-------|-------|-------|
|                                 | KEGG_PROPANOATE_METABOLISM                                          | 32    | 0.274 | 1.838 | 0.023 | 0.040 | 0.999 |
|                                 | KEGG_PURINE_METABOLISM                                              | 153   | 0.124 | 1.831 | 0.008 | 0.041 | 0.999 |
| Immune System / Signalling      | BIOCARTA_DC_PATHWAY                                                 | 22    | 0.365 | 2.085 | 0.000 | 0.012 | 0.722 |
|                                 | REACTOME_VIF_MEDIATED_DEGRADATION_OF_APOBEC3G                       | 48    | 0.539 | 4.447 | 0.000 | 0.000 | 0.000 |
|                                 | REACTOME_ANTIGEN_PROCESSING_CROSS_PRESENTATION                      | 70    | 0.483 | 4.756 | 0.000 | 0.000 | 0.000 |
|                                 | REACTOME_ACTIVATION_OF_NF_KAPPA_B_IN_B_CELLS                        | 62    | 0.388 | 3.632 | 0.000 | 0.000 | 0.000 |
|                                 | REACTOME_MHC_CLASS_II_ANTIGEN_PRESENTATION                          | 89    | 0.275 | 3.067 | 0.000 | 0.000 | 0.000 |
|                                 | KEGG_CYTOKINE_CYTOKINE_RECEPTOR_INTERACTION                         | 252   | 0.164 | 3.008 | 0.000 | 0.000 | 0.001 |
|                                 | BIOCARTA_NO2IL12_PATHWAY                                            | 17    | 0.537 | 2.708 | 0.000 | 0.000 | 0.009 |
|                                 | REACTOME_COSTIMULATION_BY_THE_CD28_FAMILY                           | 60    | 0.293 | 2.648 | 0.000 | 0.000 | 0.013 |
|                                 | REACTOME_INTERFERON_GAMMA_SIGNALING                                 | 57    | 0.259 | 2.304 | 0.000 | 0.003 | 0.239 |
|                                 | ST_FAS_SIGNALING_PATHWAY                                            | 63    | 0.247 | 2.303 | 0.002 | 0.003 | 0.239 |
|                                 | KEGG_CHEMOKINE_SIGNALING_PATHWAY                                    | 184   | 0.139 | 2.223 | 0.000 | 0.005 | 0.408 |
|                                 | REACTOME_INTERFERON_SIGNALING                                       | 149   | 0.153 | 2.206 | 0.000 | 0.006 | 0.438 |
|                                 | BIOCARTA_IL12_PATHWAY                                               | 22    | 0.350 | 1.986 | 0.004 | 0.020 | 0.906 |
|                                 | REACTOME_INTERFERON_ALPHA_BETA_SIGNALING                            | 61    | 0.214 | 1.957 | 0.004 | 0.023 | 0.941 |
|                                 | REACTOME_PD1_SIGNALING                                              | 16    | 0.397 | 1.924 | 0.008 | 0.027 | 0.964 |
|                                 | REACTOME_CTLA4_INHIBITORY_SIGNALING                                 | 21    | 0.339 | 1.850 | 0.012 | 0.038 | 0.995 |
|                                 | BIOCARTA_GATA3_PATHWAY                                              | 15    | 0.389 | 1.824 | 0.015 | 0.042 | 1.000 |
|                                 | BIOCARTA_CTLA4_PATHWAY                                              | 19    | 0.340 | 1.794 | 0.023 | 0.047 | 1.000 |
|                                 | BIOCARTA_SPPA_PATHWAY                                               | 22    | 0.354 | 1.997 | 0.004 | 0.019 | 0.890 |
|                                 | BIOCARTA_STEM_PATHWAY                                               | 15    | 0.436 | 2.001 | 0.006 | 0.018 | 0.882 |
|                                 | REACTOME_NEGATIVE_REGULATORS_OF_RIG_I_MDA5_SIGNALING                | 30    | 0.413 | 2.664 | 0.000 | 0.000 | 0.012 |
|                                 | REACTOME_ER_PHAGOSOME_PATHWAY                                       | 56    | 0.505 | 4.553 | 0.000 | 0.000 | 0.000 |
|                                 | REACTOME_CROSS_PRESENTATION_OF_SOLUBLE_EXOGENOUS_ANTIGENS_ENDOSOMES | 47    | 0.556 | 4.538 | 0.000 | 0.000 | 0.000 |
| REACTOME_ADAPTIVE_IMMUNE_SYSTEM | 495                                                                 | 0.172 | 4.471 | 0.000 | 0.000 | 0.000 |       |

|                                                                   |     |       |       |       |       |       |
|-------------------------------------------------------------------|-----|-------|-------|-------|-------|-------|
| REACTOME_SIGNALING_BY_THE_B_CELL_RECEPTOR_BCR                     | 121 | 0.268 | 3.532 | 0.000 | 0.000 | 0.000 |
| REACTOME_GPCR_LIGAND_BINDING                                      | 390 | 0.139 | 3.236 | 0.000 | 0.000 | 0.000 |
| BIOCARTA_NKT_PATHWAY                                              | 29  | 0.498 | 3.140 | 0.000 | 0.000 | 0.000 |
| REACTOME_DOWNSTREAM_SIGNALING_EVENTS_OF_B_CELL_RECEPTOR_BCR       | 92  | 0.281 | 3.127 | 0.000 | 0.000 | 0.000 |
| REACTOME_G_ALPHA_I_SIGNALLING_EVENTS                              | 189 | 0.189 | 3.028 | 0.000 | 0.000 | 0.000 |
| BIOCARTA_INFLAM_PATHWAY                                           | 28  | 0.457 | 2.861 | 0.000 | 0.000 | 0.003 |
| REACTOME_INNATE_IMMUNE_SYSTEM                                     | 258 | 0.142 | 2.738 | 0.000 | 0.000 | 0.007 |
| REACTOME_CLASS_I_MHC_MEDIATED_ANTIGEN_PROCESSING_PRESENTATION     | 229 | 0.158 | 2.733 | 0.000 | 0.000 | 0.008 |
| KEGG_INTESTINAL_IMMUNE_NETWORK_FOR_IGA_PRODUCTION                 | 44  | 0.339 | 2.649 | 0.000 | 0.000 | 0.013 |
| KEGG_ANTIGEN_PROCESSING_AND_PRESENTATION                          | 71  | 0.256 | 2.559 | 0.000 | 0.001 | 0.041 |
| REACTOME_CHEMOKINE_RECEPTORS_BINDING_CHEMOKINES                   | 54  | 0.276 | 2.399 | 0.000 | 0.002 | 0.128 |
| REACTOME_ANTIGEN_PROCESSING_UBIQUITINATION_PROTEASOME_DEGRADATION | 194 | 0.143 | 2.294 | 0.000 | 0.003 | 0.252 |
| BIOCARTA_CYTOKINE_PATHWAY                                         | 21  | 0.410 | 2.284 | 0.000 | 0.003 | 0.276 |
| BIOCARTA_TH1TH2_PATHWAY                                           | 18  | 0.427 | 2.210 | 0.000 | 0.006 | 0.431 |
| KEGG_TOLL_LIKE_RECEPTOR_SIGNALING_PATHWAY                         | 100 | 0.187 | 2.184 | 0.000 | 0.007 | 0.491 |
| REACTOME_PLATELET_ACTIVATION_SIGNALING_AND_AGGREGATION            | 195 | 0.135 | 2.180 | 0.002 | 0.007 | 0.500 |
| KEGG_HEMATOPOIETIC_CELL_LINEAGE                                   | 82  | 0.186 | 1.999 | 0.006 | 0.018 | 0.885 |
| REACTOME_GPVI_MEDIATED_ACTIVATION_CASCADE                         | 31  | 0.296 | 1.989 | 0.006 | 0.019 | 0.902 |
| REACTOME_TRIF_MEDIATED_TLR3_SIGNALING                             | 70  | 0.199 | 1.974 | 0.004 | 0.021 | 0.925 |
| KEGG_B_CELL_RECEPTOR_SIGNALING_PATHWAY                            | 74  | 0.192 | 1.935 | 0.006 | 0.025 | 0.956 |
| REACTOME_CYTOKINE_SIGNALING_IN_IMMUNE_SYSTEM                      | 255 | 0.103 | 1.906 | 0.006 | 0.029 | 0.977 |
| REACTOME_ACTIVATED_TLR4_SIGNALLING                                | 88  | 0.170 | 1.878 | 0.010 | 0.033 | 0.988 |
| REACTOME_TOLL_RECEPTOR_CASCADES                                   | 111 | 0.150 | 1.867 | 0.004 | 0.035 | 0.992 |
| REACTOME_RIG_I_MDA5_MEDIATED_IND                                  | 72  | 0.182 | 1.813 | 0.011 | 0.044 | 1.000 |



|                  |                                                                      |     |       |       |       |       |       |
|------------------|----------------------------------------------------------------------|-----|-------|-------|-------|-------|-------|
|                  | UNCTION_OF_IFN_ALPHA_BETA_PATHWAY                                    |     |       |       |       |       |       |
|                  | KEGG_RIG_I_LIKE_RECEPTOR_SIGNALING_PATHWAY                           | 71  | 0.182 | 1.810 | 0.021 | 0.044 | 1.000 |
|                  | KEGG_LEUKOCYTE_TRANSENDOTHELIAL_MIGRATION                            | 114 | 0.143 | 1.808 | 0.016 | 0.045 | 1.000 |
|                  | BIOCARTA_NFAT_PATHWAY                                                | 51  | 0.211 | 1.808 | 0.015 | 0.044 | 1.000 |
| CellCycle/Prolif | REACTOME_ACTIVATION_OF_BH3_ONLY_PROTEINS                             | 16  | 0.470 | 2.180 | 0.002 | 0.007 | 0.500 |
|                  | BIOCARTA_MCM_PATHWAY                                                 | 18  | 0.435 | 2.151 | 0.000 | 0.008 | 0.577 |
|                  | REACTOME_AUTODEGRADATION_OF_CD_H1_BY_CDH1_APC_C                      | 56  | 0.505 | 4.475 | 0.000 | 0.000 | 0.000 |
|                  | <b>REACTOME_MITOTIC_G1_G1_S_PHASES</b>                               | 129 | 0.449 | 5.912 | 0.000 | 0.000 | 0.000 |
|                  | <b>REACTOME_SYNTHESIS_OF_DNA</b>                                     | 90  | 0.494 | 5.698 | 0.000 | 0.000 | 0.000 |
|                  | <b>REACTOME_CELL_CYCLE_CHECKPOINTS</b>                               | 111 | 0.405 | 5.010 | 0.000 | 0.000 | 0.000 |
|                  | <b>REACTOME_CYCLIN_E_ASSOCIATED_EVENTS_DURING_G1_S_TRANSITION</b>    | 62  | 0.533 | 4.968 | 0.000 | 0.000 | 0.000 |
|                  | <b>REACTOME_SCF5P2_MEDIATED_DEGRADATION_OF_P27_P21</b>               | 53  | 0.537 | 4.575 | 0.000 | 0.000 | 0.000 |
|                  | <b>REACTOME_REGULATION_OF_APOPTOSIS</b>                              | 56  | 0.487 | 4.297 | 0.000 | 0.000 | 0.000 |
|                  | <b>REACTOME_CYCLIN_A_B1_ASSOCIATED_EVENTS_DURING_G2_M_TRANSITION</b> | 15  | 0.628 | 2.951 | 0.000 | 0.000 | 0.001 |
|                  | <b>REACTOME_APOPTOTIC_EXECUTION_PHASE</b>                            | 53  | 0.335 | 2.812 | 0.000 | 0.000 | 0.004 |
|                  | <b>REACTOME_DNA_REPAIR</b>                                           | 103 | 0.206 | 2.487 | 0.000 | 0.001 | 0.073 |
|                  | <b>BIOCARTA_CELLCYCLE_PATHWAY</b>                                    | 23  | 0.405 | 2.390 | 0.000 | 0.002 | 0.140 |
|                  | <b>REACTOME_EXTENSION_OF_TELOMERES</b>                               | 27  | 0.380 | 2.345 | 0.000 | 0.002 | 0.196 |
|                  | REACTOME_CELL_CYCLE                                                  | 394 | 0.321 | 7.424 | 0.000 | 0.000 | 0.000 |
|                  | REACTOME_CELL_CYCLE_MITOTIC                                          | 306 | 0.348 | 7.115 | 0.000 | 0.000 | 0.000 |
|                  | REACTOME_DNA_REPLICATION                                             | 187 | 0.427 | 6.644 | 0.000 | 0.000 | 0.000 |
|                  | REACTOME_MITOTIC_M_M_G1_PHASES                                       | 167 | 0.415 | 6.287 | 0.000 | 0.000 | 0.000 |
|                  | REACTOME_G1_S_TRANSITION                                             | 106 | 0.501 | 6.199 | 0.000 | 0.000 | 0.000 |
|                  | REACTOME_S_PHASE                                                     | 106 | 0.482 | 5.927 | 0.000 | 0.000 | 0.000 |
|                  | REACTOME_APOPTOSIS                                                   | 144 | 0.362 | 5.179 | 0.000 | 0.000 | 0.000 |
|                  | <b>REACTOME_M_G1_TRANSITION</b>                                      | 78  | 0.483 | 4.957 | 0.000 | 0.000 | 0.000 |
|                  | REACTOME_ORC1_REMOVAL_FROM_CHR                                       | 65  | 0.511 | 4.929 | 0.000 | 0.000 | 0.000 |

|                                                                                                                   |     |       |       |       |       |       |
|-------------------------------------------------------------------------------------------------------------------|-----|-------|-------|-------|-------|-------|
| OMATIN                                                                                                            |     |       |       |       |       |       |
| REACTOME_ASSEMBLY_OF_THE_PRE_REPLICATIVE_COMPLEX                                                                  | 63  | 0.505 | 4.821 | 0.000 | 0.000 | 0.000 |
| REACTOME_REGULATION_OF_MITOTIC_CELL_CYCLE                                                                         | 77  | 0.457 | 4.763 | 0.000 | 0.000 | 0.000 |
| REACTOME_APC_C_CDC20_MEDIATED_DEGRADATION_OF_MITOTIC_PROTEINS                                                     | 65  | 0.489 | 4.716 | 0.000 | 0.000 | 0.000 |
| REACTOME_APC_C_CDH1_MEDIATED_DEGRADATION_OF_CDC20_AND_OTHER_APC_C_CDH1_TARGETED_PROTEINS_IN_LATE_MITOSIS_EARLY_G1 | 64  | 0.487 | 4.673 | 0.000 | 0.000 | 0.000 |
| REACTOME_P53_INDEPENDENT_G1_S_DNA_DAMAGE_CHECKPOINT                                                               | 48  | 0.539 | 4.427 | 0.000 | 0.000 | 0.000 |
| REACTOME_CDK_MEDIATED_PHOSPHORYLATION_AND_REMOVAL_OF_CDC6                                                         | 46  | 0.553 | 4.407 | 0.000 | 0.000 | 0.000 |
| REACTOME_P53_DEPENDENT_G1_DNA_DAMAGE_RESPONSE                                                                     | 53  | 0.498 | 4.292 | 0.000 | 0.000 | 0.000 |
| REACTOME_SIGNALING_BY_WNT                                                                                         | 61  | 0.465 | 4.271 | 0.000 | 0.000 | 0.000 |
| REACTOME_CDT1_ASSOCIATION_WITH_THE_CDC6_ORC_ORIGIN_COMPLEX                                                        | 54  | 0.486 | 4.259 | 0.000 | 0.000 | 0.000 |
| REACTOME_DEPOSITION_OF_NEW_CENPA_CONTAINING_NUCLEOSOMES_AT_THE_CENTROMERE                                         | 59  | 0.461 | 4.245 | 0.000 | 0.000 | 0.000 |
| REACTOME_SCF_BETA_TRCP_MEDIATED_DEGRADATION_OF_EMI1                                                               | 49  | 0.510 | 4.243 | 0.000 | 0.000 | 0.000 |
| REACTOME_TRANSLATION                                                                                              | 142 | 0.299 | 4.219 | 0.000 | 0.000 | 0.000 |
| REACTOME_G1_S_SPECIFIC_TRANSCRIPTION                                                                              | 17  | 0.839 | 4.200 | 0.000 | 0.000 | 0.000 |
| REACTOME_AUTODEGRADATION_OF_THE_E3_UBIQUITIN_LIGASE_COPI                                                          | 47  | 0.505 | 4.136 | 0.000 | 0.000 | 0.000 |
| REACTOME_CHROMOSOME_MAINTENANCE                                                                                   | 115 | 0.332 | 4.105 | 0.000 | 0.000 | 0.000 |
| REACTOME_REGULATION_OF_MRNA_STABILITY_BY_PROTEINS_THAT_BIND_AURICH_ELEMENTS                                       | 80  | 0.387 | 4.081 | 0.000 | 0.000 | 0.000 |
| REACTOME_RNA_POL_I_PROMOTER_OPENING                                                                               | 54  | 0.470 | 4.053 | 0.000 | 0.000 | 0.000 |
| REACTOME_SRP_DEPENDENT_COTRANSLATIONAL_PROTEIN_TARGETING_TO_MEMBRANE                                              | 106 | 0.339 | 4.032 | 0.000 | 0.000 | 0.000 |

|                                                                        |     |       |       |       |       |       |
|------------------------------------------------------------------------|-----|-------|-------|-------|-------|-------|
| REACTOME_TELOMERE_MAINTENANCE                                          | 72  | 0.387 | 3.886 | 0.000 | 0.000 | 0.000 |
| KEGG_RIBOSOME                                                          | 84  | 0.354 | 3.827 | 0.000 | 0.000 | 0.000 |
| REACTOME_MITOTIC_PROMETAPHASE                                          | 85  | 0.348 | 3.711 | 0.000 | 0.000 | 0.000 |
| BIOCARTA_PROTEASOME_PATHWAY                                            | 28  | 0.583 | 3.700 | 0.000 | 0.000 | 0.000 |
| REACTOME_MEIOTIC_RECOMBINATION                                         | 76  | 0.357 | 3.680 | 0.000 | 0.000 | 0.000 |
| KEGG_CELL_CYCLE                                                        | 124 | 0.270 | 3.608 | 0.000 | 0.000 | 0.000 |
| REACTOME_DNA_STRAND_ELONGATION                                         | 30  | 0.552 | 3.546 | 0.000 | 0.000 | 0.000 |
| REACTOME_3_UTR_MEDIATED_TRANSLATIONAL_REGULATION                       | 102 | 0.298 | 3.498 | 0.000 | 0.000 | 0.000 |
| REACTOME_PEPTIDE_CHAIN_ELONGATION                                      | 83  | 0.333 | 3.490 | 0.000 | 0.000 | 0.000 |
| REACTOME_RNA_POL_I_TRANSCRIPTION                                       | 79  | 0.336 | 3.480 | 0.000 | 0.000 | 0.000 |
| REACTOME_TRANSCRIPTION                                                 | 190 | 0.217 | 3.425 | 0.000 | 0.000 | 0.000 |
| REACTOME_E2F_MEDIATED_REGULATION_OF_DNA_REPLICATION                    | 33  | 0.495 | 3.375 | 0.000 | 0.000 | 0.000 |
| REACTOME_G2_M_CHECKPOINTS                                              | 41  | 0.435 | 3.308 | 0.000 | 0.000 | 0.000 |
| REACTOME_MEIOSIS                                                       | 104 | 0.274 | 3.284 | 0.000 | 0.000 | 0.000 |
| REACTOME_FORMATION_OF_TUBULIN_FOLDING_INTERMEDIATES_BY_CCT_TRIC        | 21  | 0.576 | 3.142 | 0.000 | 0.000 | 0.000 |
| REACTOME_PACKAGING_OF_TELOMERE_ENDS                                    | 45  | 0.395 | 3.136 | 0.000 | 0.000 | 0.000 |
| KEGG_DNA_REPLICATION                                                   | 36  | 0.430 | 3.078 | 0.000 | 0.000 | 0.000 |
| REACTOME_NONSENSE_MEDIATED_DECAY_ENHANCED_BY_THE_EXON_JUNCTION_COMPLEX | 103 | 0.255 | 3.056 | 0.000 | 0.000 | 0.000 |
| REACTOME_MEIOTIC_SYNAPSIS                                              | 68  | 0.307 | 2.964 | 0.000 | 0.000 | 0.001 |
| KEGG_P53_SIGNALING_PATHWAY                                             | 67  | 0.300 | 2.915 | 0.000 | 0.000 | 0.001 |
| REACTOME_PROTEIN_FOLDING                                               | 51  | 0.341 | 2.909 | 0.000 | 0.000 | 0.001 |
| REACTOME_ACTIVATION_OF_ATR_IN_RESPONSE_TO_REPLICATION_STRESS           | 35  | 0.401 | 2.859 | 0.000 | 0.000 | 0.003 |
| REACTOME_RNA_POL_I_RNA_POL_III_AND_MITOCHONDRIAL_TRANSCRIPTION         | 112 | 0.231 | 2.846 | 0.000 | 0.000 | 0.003 |
| REACTOME_ACTIVATION_OF_THE_PRE_REPLICATIVE_COMPLEX                     | 30  | 0.433 | 2.845 | 0.000 | 0.000 | 0.003 |
| REACTOME_POST_CHAPERONIN_TUBULIN_FOLDING_PATHWAY                       | 18  | 0.566 | 2.843 | 0.000 | 0.000 | 0.003 |
| REACTOME_INTRINSIC_PATHWAY_FOR_APOPTOSIS                               | 29  | 0.442 | 2.815 | 0.000 | 0.000 | 0.004 |
| REACTOME_FORMATION_OF_THE_TERNARY                                      | 47  | 0.344 | 2.803 | 0.000 | 0.000 | 0.004 |

|                                                                                                                                                  |     |       |       |       |       |       |
|--------------------------------------------------------------------------------------------------------------------------------------------------|-----|-------|-------|-------|-------|-------|
| RY_COMPLEX_AND_SUBSEQUENTLY_THE<br>_43S_COMPLEX                                                                                                  |     |       |       |       |       |       |
| KEGG_SPLICEOSOME                                                                                                                                 | 120 | 0.216 | 2.771 | 0.000 | 0.000 | 0.006 |
| KEGG_OOCYTE_MEIOSIS                                                                                                                              | 109 | 0.222 | 2.766 | 0.000 | 0.000 | 0.006 |
| REACTOME_G0_AND_EARLY_G1                                                                                                                         | 23  | 0.471 | 2.700 | 0.000 | 0.000 | 0.010 |
| REACTOME_APOPTOTIC_CLEAVAGE_OF_<br>CELLULAR_PROTEINS                                                                                             | 39  | 0.343 | 2.601 | 0.000 | 0.000 | 0.027 |
| BIOCARTA_G2_PATHWAY                                                                                                                              | 24  | 0.422 | 2.497 | 0.000 | 0.001 | 0.068 |
| KEGG_REGULATION_OF_ACTIN_CYTOSKE<br>LETON                                                                                                        | 208 | 0.150 | 2.495 | 0.000 | 0.001 | 0.068 |
| REACTOME_MRNA_SPLICING                                                                                                                           | 103 | 0.205 | 2.445 | 0.000 | 0.001 | 0.095 |
| REACTOME_ACTIVATION_OF_THE_MRNA<br>_UPON_BINDING_OF_THE_CAP_BINDING_<br>COMPLEX_AND_EIFS_AND_SUBSEQUENT_<br>BINDING_TO_43S                       | 54  | 0.276 | 2.389 | 0.000 | 0.002 | 0.143 |
| REACTOME_RNA_POL_II_TRANSCRIPTION                                                                                                                | 94  | 0.209 | 2.368 | 0.000 | 0.002 | 0.167 |
| REACTOME_LAGGING_STRAND_SYNTHES<br>IS                                                                                                            | 19  | 0.436 | 2.317 | 0.000 | 0.003 | 0.225 |
| REACTOME_MITOTIC_G2_G2_M_PHASES                                                                                                                  | 78  | 0.220 | 2.220 | 0.000 | 0.005 | 0.413 |
| REACTOME_RNA_POL_II_TRANSCRIPTION<br>_PRE_INITIATION_AND_PROMOTER_OPEN<br>ING                                                                    | 40  | 0.288 | 2.195 | 0.000 | 0.006 | 0.461 |
| REACTOME_PHOSPHORYLATION_OF_THE<br>_APC_C                                                                                                        | 17  | 0.412 | 2.053 | 0.006 | 0.015 | 0.796 |
| BIOCARTA_RAS_PATHWAY                                                                                                                             | 23  | 0.355 | 2.034 | 0.004 | 0.016 | 0.839 |
| REACTOME_RNA_POL_II_PRE_TRANSCRIP<br>TION_EVENTS                                                                                                 | 55  | 0.233 | 2.004 | 0.008 | 0.018 | 0.878 |
| BIOCARTA_RACCYCD_PATHWAY                                                                                                                         | 26  | 0.318 | 1.937 | 0.008 | 0.025 | 0.955 |
| REACTOME_INHIBITION_OF_THE_PROTEO<br>LYTIC_ACTIVITY_OF_APC_C_REQUIRED_F<br>OR_THE_ONSET_OF_ANAPHASE_BY_MITO<br>TIC_SPINDLE_CHECKPOINT_COMPONENTS | 18  | 0.369 | 1.906 | 0.007 | 0.029 | 0.977 |
| REACTOME_NUCLEOTIDE_EXCISION_REP<br>AIR                                                                                                          | 48  | 0.235 | 1.891 | 0.010 | 0.031 | 0.982 |
| KEGG_MISMATCH_REPAIR                                                                                                                             | 22  | 0.326 | 1.873 | 0.002 | 0.034 | 0.991 |
| REACTOME_PROCESSING_OF_CAPPED_IN<br>TRONLESS_PRE_MRNA                                                                                            | 22  | 0.338 | 1.870 | 0.014 | 0.034 | 0.992 |
| REACTOME_FORMATION_OF_RNA_POL_II<br>_ELONGATION_COMPLEX_                                                                                         | 39  | 0.246 | 1.867 | 0.010 | 0.035 | 0.992 |
| KEGG_NUCLEOTIDE_EXCISION_REPAIR                                                                                                                  | 42  | 0.244 | 1.851 | 0.013 | 0.038 | 0.994 |

|  |                                                       |     |       |       |       |       |       |
|--|-------------------------------------------------------|-----|-------|-------|-------|-------|-------|
|  | BIOCARTA_BARRESTIN_SRC_PATHWAY                        | 15  | 0.399 | 1.844 | 0.006 | 0.039 | 0.998 |
|  | BIOCARTA_CASPASE_PATHWAY                              | 23  | 0.314 | 1.836 | 0.006 | 0.040 | 0.999 |
|  | REACTOME_ELONGATION_ARREST_AND_RECOVERY               | 27  | 0.295 | 1.833 | 0.014 | 0.041 | 0.999 |
|  | REACTOME_APC_C_CDC20_MEDIATED_DEGRADATION_OF_CYCLIN_B | 19  | 0.349 | 1.828 | 0.016 | 0.041 | 1.000 |
|  | REACTOME_POST_TRANSLATIONAL_PROTEIN_MODIFICATION      | 180 | 0.116 | 1.797 | 0.016 | 0.047 | 1.000 |
|  | REACTOME_APC_CDC20_MEDIATED_DEGRADATION_OF_NEK2A      | 21  | 0.327 | 1.794 | 0.012 | 0.047 | 1.000 |

- 1
- 2
- 3
- 4
- 5
- 6
- 7
- 8
- 9
- 10
- 11
- 12
- 13
- 14
- 15
- 16
- 17

- 1 **Supplementary Table 6**, T cell subset, activation, and exhaustion gene signatures derived from  
 2 the literature. Symbols were cross-checked using HGNC symbol checker.

| Gene Set                        | Description                                                                                        | Reference                    | Genes                                                                                                                                                                                                                                                                                                                                                            |
|---------------------------------|----------------------------------------------------------------------------------------------------|------------------------------|------------------------------------------------------------------------------------------------------------------------------------------------------------------------------------------------------------------------------------------------------------------------------------------------------------------------------------------------------------------|
| <b>Th17 cytokines</b>           | Cytokines secreted by Th17 cells.                                                                  | (65)                         | IL23R, IL9, IL17R, IL17A, IL24, IL12RB1, IL17F, LIF, IL10, TNFRSF8, IL21, IL1R1                                                                                                                                                                                                                                                                                  |
| <b>Th17 core</b>                | Combinatorial core of transcription factor targets involved in Th17 cell specification.            | (65)<br>Figure 6D            | STAT3, IRF4, RORC, MAF, BATF, FOXL2, CYSLTR2, CCL5, HIF1A, IL18RAP, IL17A, IL17F, CCL20, CCR8, IL2, CXCR3, TBX21, CCL4, CCL3, CCR6, IL1R1, GPR15, IL18R1, IL21RB1, IL7R, IL2RA, LTB4R1, IL12RB2, LTB, IL10RA, SMAD3, IL23A, CCR7, IL24, IL4RA, IL21, CXCL10, IL6RA, IL16                                                                                         |
| <b>Th1</b>                      | Th1-specific gene signature derived from C57BL/6 mice.                                             | (66)                         | See Supplementary Table 4.                                                                                                                                                                                                                                                                                                                                       |
| <b>Th2</b>                      | Th2-specific gene signature derived from C57BL/6 mice.                                             |                              |                                                                                                                                                                                                                                                                                                                                                                  |
| <b>iTreg</b>                    | iTreg-specific gene signature derived from C57BL/6 mice.                                           |                              |                                                                                                                                                                                                                                                                                                                                                                  |
| <b>IFN-responsive</b>           | Exhaustion-specific genes associated with CD4+ T cell dysfunction during chronic infection in mice | (24)<br>Figure 3C            | MX2, MX1, ISG20, ISG15, IRF7, IFRD1, IFITM3, IFITM1<br>IFIT3, IFIT1, IFIH1, IFI44, IFI30, AIM2                                                                                                                                                                                                                                                                   |
| <b>Co-inhibitory exhaustion</b> |                                                                                                    | (24)<br>Supplemental Table 2 | BTLA, CD160, CD200, CD200R1, CD200R1L, CD244, CD274, CTLA4, HAVCR2, LAG3, LAIR1, LILRB4, PDCD1, PDCD1LG2, PILRA, SIRPB1, TIGIT                                                                                                                                                                                                                                   |
| <b>Core exhaustion</b>          |                                                                                                    | (24)<br>Supplemental Table 3 | ARAP2, CCNA2, CCNB2, CCNYL1, CD86, CENPE, CRLF3, DEPDC1, DPH5, DTL, ENTPD5, EOMES, FAM105A, GPI, GPR141, GRAP2, HSPA4L, IDH2, IFI44, IFIH1, IRF4, ISG20, KIF15, KLHL6, KLHL7, LAG3, MKI67, MLF1, MLKL, MX1, NAB1, NAP1L3, NCAPG, NLK, NSMAF, NUDT15, PLOD2, PON3, PRR11, RCBTB1, RSAD2, SATB1, SCARNA17, SETBP1, SH2D1A, SNORD35B, TAF1A, TINF2, TMEM140, TMEM2, |

|                               |                                                                                                                                                         |                 |                                                                                                                                                                                                                                                                                                                                                                                                                                                                                                                                                                                                         |
|-------------------------------|---------------------------------------------------------------------------------------------------------------------------------------------------------|-----------------|---------------------------------------------------------------------------------------------------------------------------------------------------------------------------------------------------------------------------------------------------------------------------------------------------------------------------------------------------------------------------------------------------------------------------------------------------------------------------------------------------------------------------------------------------------------------------------------------------------|
|                               |                                                                                                                                                         |                 | TNFSF4, TPX2, TXNIP, USP18                                                                                                                                                                                                                                                                                                                                                                                                                                                                                                                                                                              |
| <b>Anergic</b>                | Differentially expressed genes found in early anergic T cell clones (A.E7 CD4 <sup>+</sup> )                                                            | (67)<br>Table 1 | EGR2, ETV6, FOXP1, HLF, IRF4, JARID2, NFATC1, NOTCH1, NR4A2, NR4A3, ZFP36L1, ACTN4, AGT, ANGPTL2, ANKRD28 ANP32A, RCBTB1, S100A5, SFRP4, SOCS4, GCH1, KIFC3, PFKP, PLA2G10, ARFIP1, BNIP3, CCRN4L, DTNA, CCL1, CCL3, CSF1, TNFSF11, TNFSF9, FBXO34, GADD45B, HEBP2, DDR1, FYN, JAK3, ADORA2A, ADORA2B, F2R, GABRA4, KCNJ11, KCNK5, KCNQ5, CASP4, CTSE, FURIN, TINAG, GGA2, SLC29A3, STX11, CDC14A, DUSP6, HIF1AN, HSPA1A, IER3, JUP, LAG3, LRRC3, MARCH2, MMD, MYH14, MYL7, MYO1C, MYO1E, NDRG1, OAZ3, AGAP1, TEK2, TNFRSF19, TNFRSF4, RNF19A, SOCS6, KIF15, CLEC4E, CD40LG, MPZL2, ADGRE5, LPAR4, SRGN |
| <b>Activated Treg (up)</b>    | Genes identified by RNAseq in activated and unactivated Tregs (CD4 <sup>+</sup> CD25 <sup>hi</sup> ) and Th (CD4 <sup>+</sup> CD25 <sup>-</sup> )       | (38)            | Table S1, Treg specific, >2FC CD25 activated v unactivated                                                                                                                                                                                                                                                                                                                                                                                                                                                                                                                                              |
| <b>Activated Treg (down)</b>  |                                                                                                                                                         |                 | Table S1, Treg specific, <2FC CD25 activated v unactivated                                                                                                                                                                                                                                                                                                                                                                                                                                                                                                                                              |
| <b>Activated Teff (up)</b>    |                                                                                                                                                         |                 | Table S1, Teff specific, >2FC CD4 activated v unactivated                                                                                                                                                                                                                                                                                                                                                                                                                                                                                                                                               |
| <b>Activated Teff (down)</b>  |                                                                                                                                                         |                 | Table S1, Teff specific, <2FC CD4 activated v unactivated                                                                                                                                                                                                                                                                                                                                                                                                                                                                                                                                               |
| <b>PD-1<sup>hi</sup> up</b>   | Sorted CD8 CCR7 <sup>lo</sup> PD1 <sup>hi</sup> and PD1 <sup>lo</sup> and naïve cells from humans were profiled with microarrays (Table I and Table II) | (68)            | CD28, CD27, CTLA4, RGS1, SIRPG, MEGF6, PASK, ZNF512B, CXCR6<br>CXCR4, GZMK, ITM2A, SGPP2, TTC9, MBOAT1                                                                                                                                                                                                                                                                                                                                                                                                                                                                                                  |
| <b>PD-1<sup>hi</sup> down</b> |                                                                                                                                                         |                 | SH2D1B, TRA/TRD, LYN, LAT2, RAP2A, VAV3, KIR3DL2, KLRC3, KIR3DL1/KIR3DS1, KIR2DL2/3, KIR2DS1/2/4/5, KLRC1/2, KLRF1, KLRC4, IR2DS3, KLRD1, KIR2DL1, KIR2DL4, NCR1, KIR2DL5A, NCAM1, ITGAM, PALLD, ITGAX, IKZF2, KLF11, ZNF683, TFCP2L1, METTL7A, GNLY, GZMB, MYO6, GOLIM4, IL8RB, IL7, CMKLR1, CTBP2<br>BOK, RASSF4, PDGFD, GPR56, HDGFRP3, ADRB1, PRSS23, GOLM1, GLB1L2, TM6SF1,                                                                                                                                                                                                                        |

|                                    |                                                                                                                                                                                        |                                |                                                                                                                                                                                                                                                                                                            |
|------------------------------------|----------------------------------------------------------------------------------------------------------------------------------------------------------------------------------------|--------------------------------|------------------------------------------------------------------------------------------------------------------------------------------------------------------------------------------------------------------------------------------------------------------------------------------------------------|
|                                    |                                                                                                                                                                                        |                                | RHOBTB3, SYNGR1, OSBPL5, TSPAN2, TMCC3, LILRB1, DOCK5, ARRB1, PTGDS, FCGR3B, CES1, BNC2, SSX2IP, MXRA7                                                                                                                                                                                                     |
| <b>TF exhaustion</b>               | Gene sets associated with CD8 T cell dysfunction in acute versus chronic CMV infection in mice. Set identified through network analysis of transcription factors associated with Tbet. | (39)                           | See Supplemental Table 7, 242 gene signature of transcription factor 'neighbors' in acute and chronic networks                                                                                                                                                                                             |
| <b>Exhausted up, memory down</b>   | Gene sets associated with progressive stimulation of CD8 T cells with antigen, identified by comparing CD8 from primary to quaternary antigen exposure.                                | (22)<br>Table S6 blue module   | FIGNL1, CTLA4, PLSCR1, ART3, PRC1, TOP2A, PLK4, MKI67, HIST1H2AE, CD160, EOMES, PGLYRP1, CDC6, MYB, CKS2                                                                                                                                                                                                   |
| <b>Exhausted up, memory up</b>     |                                                                                                                                                                                        | (22)<br>STable 6 orange module | ADGRG1, CCL3, CCL4, CD244, ENTPD1, FGL2, GPD2, GZMA, GZMB, GZMK, IRF4, LAG3, LGALS3, MAD2L1, NR4A2, PBX3, PDCD1, PERP, PON2, PRDM1, RGS16, WBP5                                                                                                                                                            |
| <b>Exhausted down, memory down</b> |                                                                                                                                                                                        | (22)<br>STable 6 yellow module | ARHGAP1, ATP6V0B, CCR7, CEBPB, CRLF3, CTSW, DGKA, DUSP1, DUSP12, EEF1D, EEF2, ELOVL5, EPHB4, EVL, FOSB, GARS, GM2A, GZMM, IL7R, IMPDH2, KCNN4, KCTD12, KLF3, LEF1, LGALS13, LTB, MBP, MRPL13, PDLIM1, PIK3CD, PLAC8, PRG2, PSMD1, RPL10A, RPL13, RPL8, RPLP1, RPN2, RPS3, RPS5, SELL, SLC3A2, SMAD1, SMAD7 |
| <b>Repeat antigen exposure, up</b> | Gene sets associated with progressive stimulation of CD8 T cells with antigen,                                                                                                         | (22)<br>Table S5, >2FC         | ALCAM, ANXA1, ARHGEF12, BHLHE40, BHLHE40, CAPG, CAPN2, CARNS1, CCDC109B, CCR5, CD244, CD80, CDC20B, CDHR1, CHN2, CMKLR1, CRYBG3, CX3CR1, DDX28, DENND5A, EMP1, ERN1, ESM1, FASLG, FBXL2, FCGR2B,                                                                                                           |



|                                             |                                                         |                                   |                                                                                                                                                                                                                                                                                                                                                                                                                                                                                                                                                                                                                                                                                                                                                                                 |
|---------------------------------------------|---------------------------------------------------------|-----------------------------------|---------------------------------------------------------------------------------------------------------------------------------------------------------------------------------------------------------------------------------------------------------------------------------------------------------------------------------------------------------------------------------------------------------------------------------------------------------------------------------------------------------------------------------------------------------------------------------------------------------------------------------------------------------------------------------------------------------------------------------------------------------------------------------|
|                                             | <p>compared quaternary to primary antigen exposure.</p> |                                   | <p>GABARAPL1, GALNT3,GNA15, GSAP,GSTM5,GZMB,HAVCR2, IFIT2, IL12RB2,IL18RAP,IL1RL1, IL2RA,INPP4A,ITGAM,KCNJ8,KLRC2, KLRC3,KLRG1, LAMC1,LONRF3, LPIN1,LPP, MBD3L2, MMP25, MS4A4A, MT2A, MYL10, NEBL,OSBPL3, PIK3AP1,PLK3, PLSCR4,REEP5,RNF216,RORA, S1PR5, SAR1B, SETBP1,SLAMF1,SLAMF7, SPATS2,SRXN1, SYTL3,TCF4, TCF7L2, TEF,TMBIM1, TMEM97, TSPAN2, TTC39C, ZEB2</p>                                                                                                                                                                                                                                                                                                                                                                                                            |
| <p><b>Repeat antigen exposure, down</b></p> |                                                         | <p>(22)<br/>Table S5, &lt;2FC</p> | <p>ACTN1 AFF3 ATP6V0D2 AXIN2<br/>CAPN11 CCDC64 CCNE1 CCR7 CD55<br/>CDCA7L CDH1 COTL1 CTSE CXCR3<br/>DAPL1 DDX21 DENND2D DPP4 ECE2<br/>EIF5AP4 ENTPD5 EOMES EYA2 F2RL1<br/>FA2H FAAH FAM101B FAM134B<br/>FAM169B FAM46A FAM46C FCHSD2<br/>FZR1 HOOK1 IL2 INADL INSR<br/>ITGAX KBTBD11 LARP1 LTB LY6E<br/>LYST MAP3K5 MAPK11 MBOAT1<br/>MDN1 METTL2A<br/>METTL2B MGST2 MYB MYC<br/>NEDD4L NHP2 PDE2A PDK1 PDLIM1<br/>PDPK1 PECAM1 PGLYRP1 PLA2G16<br/>PLEKHA1 PRKCSH QPCT QTRTD1<br/>RANBP10 RAPGEF4 RASSF2 RCN3<br/>RGS10 RLTPR RNF122<br/>RNF144A RPLP1 RPP38 RRAGA RRP15<br/>SATB1 SELL SIDT1 SLAMF6 SLC11A2<br/>SLC25A40 SLFN5 SMYD2 SNHG1<br/>SPIN2A SSBP2 TCF7 TFDPI THG1L<br/>TLR1 TNFSF8 TREML2 TSR1 TTC27<br/>UBALD1 VIPR1 VWA5A WBSCR27<br/>WDR3 WDR77 WFIKKN2 XCL1</p> |

1  
2  
3

1 **Supplementary Table 7**, Data for patients used in this study.

| Glioma (G) | Age   | Sex | Diagnosis                                                  | WHO grade | Previous Treatments    | Time from First Diagnosis/MRI to Tumor Resection |        |       |      | Ki67   | IDH1 R132H mutation | MGMT promoter methylation |
|------------|-------|-----|------------------------------------------------------------|-----------|------------------------|--------------------------------------------------|--------|-------|------|--------|---------------------|---------------------------|
|            |       |     |                                                            |           |                        | Years                                            | Months | Weeks | Days |        |                     |                           |
| G1         | 45-49 | F   | Glioblastoma Multiforme                                    | IV        | Dexamethasone          |                                                  | 4      |       |      | 10%    | negative            | unmethylated              |
| G2         | 65-69 | F   | Glioblastoma Multiforme                                    | IV        | Dexamethasone          |                                                  |        |       | 4    | 40%    | negative            | partially methylated      |
| G3         | 60-64 | M   | Glioblastoma Multiforme                                    | IV        | Dexamethasone          |                                                  |        |       | 3    | 80%    | negative            | unmethylated              |
| G4         | 30-34 | F   | Secondary Glioblastoma Multiforme                          | IV        | Dexamethasone, Avastin |                                                  |        |       | N/A  | 10-20% |                     |                           |
| G5         | 70-74 | F   | Glioblastoma Multiforme                                    | IV        | Dexamethasone          |                                                  | 10     |       |      | 20%    | not recorded        | methylated                |
| G6         | 60-64 | M   | Glioblastoma Multiforme with Oligodendroglial Component    | IV        | Dexamethasone          |                                                  |        |       | 3    | >25%   |                     |                           |
| G7         | 45-49 | M   | Glioblastoma Multiforme                                    | IV        | Dexamethasone          |                                                  | 1      |       |      | >15%   |                     |                           |
| G8         | 60-64 | M   | Glioblastoma Multiforme                                    | IV        | Dexamethasone          |                                                  |        | 1     |      | >10%   | not recorded        | unmethylated              |
| G9         | 60-64 | M   | Glioblastoma Multiforme                                    | IV        | Dexamethasone          |                                                  |        |       | 10   | >25%   |                     |                           |
| G10        | 45-49 | M   | Glioma with Prominent Oligodendroglomatous Differentiation | III       | Dexamethasone          |                                                  |        | 2     |      | 12%    | positive            | not recorded              |
| G11        | 30-34 | F   | Anaplastic Oligodendroglioma                               | III       | Dexamethasone          |                                                  |        |       | 16   | 20%    | positive            | methylated                |
| G12        | 60-64 | F   | Anaplastic Oligodendroglioma                               | III       | Dexamethasone          | 12                                               |        |       |      | 20%    | positive            | methylated                |
| G13        | 45-49 | M   | Astrocytoma                                                | II        | Dexamethasone          |                                                  |        |       | 5    | <4%    | positive            | methylated                |
| G14        | 55-59 | M   | Oligoastrocytoma                                           | II        | Dexamethasone          | 14                                               |        |       |      | <3%    | positive            | methylated                |
| G15        | 40-44 | M   | Oligodendroglioma                                          | II        | Dexamethasone          |                                                  | 3      |       |      | 5%     | positive            | not recorded              |
| G16        | 55-59 | F   | Oligodendroglia                                            | II        | Dexamethasone          |                                                  |        | 6     |      | NR     | not                 | not                       |

|     |       |   | oma                               |    |               |  |   |   |     |                 | recorded     | recorded             |
|-----|-------|---|-----------------------------------|----|---------------|--|---|---|-----|-----------------|--------------|----------------------|
| G17 | 35-39 | F | Oligoastrocytoma                  | II | Dexamethasone |  |   | 6 |     | 4-6%            | negative     | partially methylated |
| G18 | 35-39 | M | Astrocytoma                       | II | Dexamethasone |  |   |   | 6   | 5-6%            |              |                      |
| G19 | 60-64 | M | Glioblastoma Multiforme           | IV | Dexamethasone |  |   | 2 |     | >50%            | not recorded | methylated           |
| G20 | 55-59 | M | Glioblastoma Multiforme           | IV | Dexamethasone |  | 1 |   |     | 20%             | not recorded | methylated           |
| G21 | 45-49 | F | Glioblastoma Multiforme           | IV | Dexamethasone |  |   |   | 1   | 20%             | negative     | methylated           |
| G22 | 45-49 | M | Glioblastoma Multiforme           | IV | Dexamethasone |  |   | 1 |     | 10%             | not recorded | unmethylated         |
| G23 | 50-54 | F | Glioblastoma Multiforme           | IV | Dexamethasone |  |   |   | 5   | 15%             | negative     | unmethylated         |
| G24 | 70-74 | M | Gliosarcoma                       | IV | Dexamethasone |  |   | 2 |     | 10%             | not recorded | not recorded         |
| G25 | 75-79 | M | Glioblastoma Multiforme           | IV | Dexamethasone |  |   |   | 1   | >20%            | negative     | partially methylated |
| G26 | 75-79 | F | Glioblastoma Multiforme           | IV | Dexamethasone |  | 2 |   |     | highly elevated | negative     | unmethylated         |
| G27 | 15-19 | F | Glioblastoma Multiforme           | IV | N/A           |  |   | 1 |     | 40%             | negative     | unmethylated         |
| G28 | 70-74 | F | Glioblastoma Multiforme           | IV | Dexamethasone |  |   |   | 2   | 25%             | negative     | methylated           |
| G29 | 80-84 | F | Glioblastoma Multiforme           | IV | Dexamethasone |  |   |   | 3   | 15%             | negative     | unmethylated         |
| G30 | 60-64 | M | Glioblastoma Multiforme           | IV | Prednisone    |  |   |   | 1   | 15%             | positive     | methylated           |
| G31 | 60-64 | M | Glioblastoma Multiforme           | IV | Dexamethasone |  |   |   | 1   | 20%             | negative     | methylated           |
| G32 | 65-69 | M | Glioblastoma Multiforme           | IV | Dexamethasone |  | 1 |   |     | 40%             | not recorded | unmethylated         |
| G33 | 55-59 | M | Glioblastoma Multiforme           | IV | Dexamethasone |  |   |   | 6   | 20%             | negative     | unmethylated         |
| G34 | 65-69 | M | Glioblastoma Multiforme           | IV | Dexamethasone |  | 1 |   |     | >60%            | not recorded | methylated           |
| G35 | 50-54 | F | Glioblastoma Multiforme           | IV | Dexamethasone |  | 1 |   |     | 5%              | not recorded | partially methylated |
| G36 | 55-59 | M | Recurrent Glioblastoma Multiforme | IV | Dexamethasone |  |   |   | N/A | NR              |              |                      |
| G37 | 70-74 | M | Glioblastoma                      | IV | Dexamethasone |  |   | 1 |     | NR              | not          | unmethylated         |

|                       |       |   | Multiforme                            |     |                                                         |   |   |   |     |                             | recorded | ted                  |
|-----------------------|-------|---|---------------------------------------|-----|---------------------------------------------------------|---|---|---|-----|-----------------------------|----------|----------------------|
| G38                   | 45-49 | M | Glioblastoma<br>Multiforme            | IV  | Dexamethasone                                           |   |   | 5 |     | 40%                         | negative | unmethylated         |
| G39                   | 65-69 | F | Glioblastoma<br>Multiforme            | IV  | Dexamethasone                                           |   |   |   | 3   | 40%                         | negative | methylated           |
| G40                   | 80-84 | M | Glioblastoma<br>Multiforme            | IV  | N/A                                                     |   |   | 1 |     | 15%                         | positive | methylated           |
|                       |       |   |                                       |     |                                                         |   |   |   |     |                             |          |                      |
| BT 213                | 79    | F | Glioblastoma                          | IV  | None (Keppra)                                           |   |   |   | 5   | "scattered mitotic figures" | negative | unmethylated         |
| BT 215                | 76    | F | Glioblastoma                          | IV  | Dexamethasone                                           |   |   |   | 8   | "numerous mitotic figures"  | negative | methylated           |
| BT 219                | 56    | F | Anaplastic<br>Oligoastrocytoma        | III | Dexamethasone<br>(and Keppra)                           |   |   |   | 3   | 25-30%                      | negative | partially methylated |
| BT 220                | 63    | M | Recurrent<br>Residual<br>Glioblastoma | IV  | Partial brain<br>XRT +<br>dexamethasone<br>(and Keppra) |   | 5 |   |     | 10-15%                      | negative | partially methylated |
| BT 223                | 84    | F | Glioblastoma                          | IV  | Dexamethasone<br>(and Keppra)                           |   | 2 |   |     | >30%                        | negative | methylated           |
| BT 228                | 40    | F | Glioblastoma                          | IV  | Dexamethasone<br>*                                      |   |   |   | 12* | >25%                        | negative | methylated           |
| BT 229                | 61    | M | Glioblastoma                          | IV  | Dexamethasone<br>(and Keppra)                           |   |   |   | 8   | >10%                        | negative | methylated           |
| Patient 3<br>(CyTOF)  | 69    | F | Glioblastoma                          | -   | Nivolumab                                               | - | - | - | -   | -                           | -        | -                    |
| Patient 6<br>(CyTOF)  | 67    | F | Glioblastoma                          | -   | Nivolumab                                               | - | - | - | -   | -                           | -        | -                    |
| Patient 11<br>(CyTOF) | 58    | M | Glioblastoma                          | -   | Nivolumab                                               | - | - | - | -   | -                           | -        | -                    |
| Patient 14<br>(CyTOF) | 43    | M | Glioblastoma                          | -   | Nivolumab                                               | - | - | - | -   | -                           | -        | -                    |

- 1 \*Note: 10 years prior, oligoastrocytoma (WHO grade 2) in same location (cerebellum) treated with surgery,  
2 temozolomide, radiation therapy, and dexamethasone.

- 1
- 2 **Supplementary Table 8**, Differentially expressed genes in Programmed cell death protein 1 (PD-
- 3 1)<sup>high</sup> and PD-1<sup>low</sup> Tregs from healthy donors compared to all GBM patients.

| Comparison                                             | Gene      | Log2FC   | p-value  | FDR      |
|--------------------------------------------------------|-----------|----------|----------|----------|
| <b>PD1- GBM<br/>blood versus<br/>PD1- HC<br/>blood</b> | NOG       | 8.19     | 3.37E-15 | 6.87E-11 |
|                                                        | XIST      | -12.80   | 1.95E-11 | 1.99E-07 |
|                                                        | PRDM1     | -3.38    | 1.07E-10 | 7.30E-07 |
|                                                        | GIMAP4    | 2.59     | 4.06E-09 | 2.07E-05 |
|                                                        | DQ786258  | 4.15     | 1.51E-07 | 6.17E-04 |
|                                                        | ARHGEF11  | 2.81     | 2.76E-07 | 8.09E-04 |
|                                                        | AK125960  | -20.00   | 2.78E-07 | 8.09E-04 |
|                                                        | FAM171A1  | 5.98     | 3.33E-07 | 8.48E-04 |
|                                                        | ESYT1     | 2.03     | 4.75E-07 | 9.78E-04 |
|                                                        | GIMAP8    | 3.15     | 4.80E-07 | 9.78E-04 |
|                                                        | LINC00282 | 5.68     | 6.73E-07 | 1.25E-03 |
|                                                        | PRKY      | 2.82     | 1.11E-06 | 1.86E-03 |
|                                                        | USP9Y     | 3.00     | 1.26E-06 | 1.86E-03 |
|                                                        | ARHGAP32  | 3.43     | 1.28E-06 | 1.86E-03 |
|                                                        | ZNF248    | 2.74     | 2.14E-06 | 2.90E-03 |
|                                                        | DENND2D   | 2.29     | 2.71E-06 | 3.45E-03 |
|                                                        | INPP4A    | 1.88     | 3.07E-06 | 3.69E-03 |
|                                                        | TCF7      | 1.79     | 3.73E-06 | 4.23E-03 |
|                                                        | RNASEL    | 2.23     | 7.01E-06 | 7.52E-03 |
|                                                        | NUAK2     | 2.11     | 1.13E-05 | 1.16E-02 |
|                                                        | GPA33     | 2.07     | 1.37E-05 | 1.33E-02 |
|                                                        | C20orf112 | 2.17     | 1.56E-05 | 1.39E-02 |
|                                                        | HIVEP2    | 2.01     | 1.59E-05 | 1.39E-02 |
|                                                        | BTBD11    | 2.08     | 1.64E-05 | 1.39E-02 |
|                                                        | ZNF30     | 2.58     | 1.73E-05 | 1.39E-02 |
|                                                        | DQ593252  | 1.88     | 1.77E-05 | 1.39E-02 |
| ZHX2                                                   | 2.11      | 2.25E-05 | 1.68E-02 |          |
| CISH                                                   | 2.52      | 2.41E-05 | 1.68E-02 |          |

|                     |          |       |          |                        |
|---------------------|----------|-------|----------|------------------------|
|                     | GIMAP6   | 1.99  | 2.52E-05 | 1.68E-02 <sub>1</sub>  |
|                     | RAB10    | 1.92  | 2.53E-05 | 1.68E-02 <sub>2</sub>  |
|                     | ST6GAL1  | 1.96  | 2.56E-05 | 1.68E-02 <sub>3</sub>  |
|                     | AMIGO1   | 2.99  | 2.91E-05 | 1.86E-02 <sub>4</sub>  |
|                     | DDIT4    | -1.92 | 3.15E-05 | 1.94E-02 <sub>5</sub>  |
|                     | DYRK2    | 1.64  | 3.45E-05 | 2.05E-02 <sub>6</sub>  |
|                     | AK056689 | 2.08  | 3.60E-05 | 2.05E-02 <sub>7</sub>  |
|                     | BCL9     | 2.81  | 3.61E-05 | 2.05E-02 <sub>8</sub>  |
|                     | TMEM204  | 2.31  | 3.73E-05 | 2.06E-02 <sub>9</sub>  |
|                     | PAQR8    | 2.46  | 3.83E-05 | 2.06E-02 <sub>10</sub> |
|                     | HERPUD1  | -2.58 | 4.42E-05 | 2.29E-02 <sub>11</sub> |
|                     | EPHA1    | 2.81  | 4.50E-05 | 2.29E-02 <sub>11</sub> |
|                     | SH2D3C   | 2.04  | 4.74E-05 | 2.36E-02 <sub>12</sub> |
|                     | RBMS3    | 2.02  | 5.16E-05 | 2.50E-02 <sub>13</sub> |
|                     | CAD      | 2.00  | 6.45E-05 | 3.06E-02 <sub>14</sub> |
|                     | ZNF792   | 2.60  | 7.14E-05 | 3.31E-02 <sub>15</sub> |
|                     | TOB1     | -1.86 | 8.58E-05 | 3.87E-02 <sub>16</sub> |
|                     | ABLIM1   | 1.59  | 8.73E-05 | 3.87E-02 <sub>17</sub> |
|                     | FAM203A  | 2.67  | 9.55E-05 | 4.15E-02 <sub>18</sub> |
|                     | PLAG1    | 3.89  | 1.05E-04 | 4.39E-02 <sub>19</sub> |
|                     | NIPAL3   | 1.56  | 1.05E-04 | 4.39E-02 <sub>20</sub> |
|                     | ITGA6    | 1.74  | 1.11E-04 | 4.54E-02 <sub>21</sub> |
|                     | ZNF146   | 1.73  | 1.17E-04 | 4.65E-02 <sub>22</sub> |
|                     | ZNF28    | 2.47  | 1.18E-04 | 4.65E-02 <sub>23</sub> |
| <b>PD1+ GBM</b>     | ADCK1    | 20.00 | 2.58E-06 | 3.30E-02 <sub>24</sub> |
| <b>Blood versus</b> | ZNF823   | 7.91  | 4.94E-06 | 3.30E-02 <sub>25</sub> |
| <b>PD1+ HC</b>      | ZNF443   | 20.00 | 3.86E-06 | 3.30E-02 <sub>26</sub> |
| <b>Blood</b>        | MAN1C1   | 5.32  | 7.82E-06 | 3.93E-02               |

1 **Supplementary Table 9**, Gene sets enrichment analysis (GSEA) results for exhaustion gene sets  
 2 in Programmed cell death protein 1 (PD-1)<sup>high</sup> and PD-1<sup>-</sup> tumor and blood-derived Tregs.

| Comparison                                 | Enriched in | Gene Set NAME                 | SIZE | ES      | NES     | NOM p-val | FDR q-val | FWER p-val | RANK AT MAX |
|--------------------------------------------|-------------|-------------------------------|------|---------|---------|-----------|-----------|------------|-------------|
| PD-1 positive versus PD-1 negative - Blood | PD1p        | 01_TH17 CYTOKINES             | 11   | 0.4451  | 1.7659  | 0.0182    | 0.0574    | 0.1840     | 7211        |
|                                            | PD1n        | 02_TH17_CORE                  | 35   | -0.2388 | -1.7133 | 0.0200    | 0.0292    | 0.2230     | 17260       |
|                                            | PD1n        | 03_TH1                        | 66   | -0.2419 | -2.2892 | 0.0000    | 0.0013    | 0.0060     | 17830       |
|                                            | PD1p        | 04_TH2                        | 71   | 0.1204  | 1.1679  | 0.2711    | 0.3096    | 0.9590     | 13120       |
|                                            | PD1n        | 05_ITREG                      | 32   | -0.2564 | -1.7170 | 0.0327    | 0.0314    | 0.2200     | 15807       |
|                                            | PD1n        | 06_IFN_RESPONSIVE_CD4         | 14   | -0.3729 | -1.6558 | 0.0297    | 0.0365    | 0.2870     | 14198       |
|                                            | PD1p        | 07_CO_INHIB_EXHAUSTIONCD4     | 16   | 0.2871  | 1.3985  | 0.1091    | 0.1604    | 0.6970     | 13422       |
|                                            | PD1n        | 08_CORE_EXHAUSTION            | 52   | -0.2107 | -1.7966 | 0.0139    | 0.0242    | 0.1590     | 18696       |
|                                            | PD1n        | 09_ANERGIC                    | 78   | -0.0941 | -0.9681 | 0.5041    | 0.4841    | 0.9980     | 19214       |
|                                            | PD1n        | 10_UP_ACTIVATEDTREGSPECIFIC   | 95   | -0.2205 | -2.4676 | 0.0000    | 0.0000    | 0.0000     | 18853       |
|                                            | PD1n        | 11_DOWN_ACTIVATEDTREGSPECIFIC | 84   | -0.2330 | -2.5361 | 0.0000    | 0.0000    | 0.0000     | 17176       |
|                                            | PD1n        | 12_UP_ACTIVATEDTEFFSPECIFIC   | 45   | -0.3123 | -2.4646 | 0.0000    | 0.0000    | 0.0000     | 7930        |
|                                            | PD1n        | 13_DOWN_ACTIVATEDTEFFSPECIFIC | 52   | -0.2571 | -2.2123 | 0.0020    | 0.0016    | 0.0090     | 13092       |
|                                            | PD1n        | 14_PD1UP                      | 15   | -0.3975 | -1.8834 | 0.0082    | 0.0157    | 0.0970     | 15394       |
|                                            | PD1p        | 15_PD1DOWN                    | 50   | 0.1284  | 1.1031  | 0.3234    | 0.3212    | 0.9820     | 13582       |
|                                            | PD1n        | 16_TF_EXHAUSTED               | 232  | -0.2374 | -4.0790 | 0.0000    | 0.0000    | 0.0000     | 16228       |
|                                            | PD1p        | 17_EXHAUSTEDUP_MEMORYDOWN     | 15   | 0.3458  | 1.6061  | 0.0473    | 0.0835    | 0.3720     | 13307       |
|                                            | PD1n        | 18_EXHAUSTED_UPMEMORYUP       | 21   | -0.2489 | -1.3658 | 0.1196    | 0.1393    | 0.7490     | 17972       |
|                                            | PD1n        | 19_EXHAUSTEDDOWN_MEMORYDOWN   | 44   | -0.3302 | -2.6110 | 0.0000    | 0.0000    | 0.0000     | 15379       |
|                                            | PD1n        | 20_UPINQUATERNARYCD8          | 75   | -0.1059 | -1.0855 | 0.3198    | 0.3609    | 0.9810     | 18075       |
|                                            | PD1n        | 21_DOWNINQUARTERNARYCD8       | 103  | -0.2383 | -2.8905 | 0.0000    | 0.0000    | 0.0000     | 9312        |
| PD-1 positive versus PD-1 negative - Tumor | PD1p        | 01_TH17 CYTOKINES             | 11   | 0.4853  | 1.9680  | 0.0020    | 0.0165    | 0.0810     | 6185        |
|                                            | PD1p        | 02_TH17_CORE                  | 35   | 0.4310  | 2.9988  | 0.0000    | 0.0000    | 0.0000     | 7249        |
|                                            | PD1p        | 03_TH1                        | 66   | 0.2259  | 2.1529  | 0.0020    | 0.0078    | 0.0290     | 2758        |
|                                            | PD1p        | 04_TH2                        | 71   | 0.1124  | 1.0970  | 0.3140    | 0.3487    | 0.9820     | 6488        |

|                                          |       |                                 |     |         |         |        |        |        |       |
|------------------------------------------|-------|---------------------------------|-----|---------|---------|--------|--------|--------|-------|
|                                          | PD1p  | 05_ITREG                        | 32  | 0.1844  | 1.2424  | 0.1894 | 0.2550 | 0.9090 | 4075  |
|                                          | PD1p  | 06_IFN_RESPONSIVE_CD4           | 14  | 0.3855  | 1.7228  | 0.0280 | 0.0435 | 0.2350 | 6576  |
|                                          | PD1p  | 07_CO_INHIB_EXHAUSTIONCD4       | 16  | 0.3909  | 1.8945  | 0.0104 | 0.0201 | 0.1100 | 10771 |
|                                          | PD1p  | 08_CORE_EXHAUSTION              | 52  | 0.1804  | 1.5659  | 0.0379 | 0.0800 | 0.4430 | 13573 |
|                                          | PD1p  | 09_ANERGIC                      | 78  | 0.1545  | 1.6079  | 0.0401 | 0.0707 | 0.3760 | 6869  |
|                                          | PD1p  | 10_UP_ACTIVATEDTREGS SPECIFIC   | 95  | 0.2349  | 2.7122  | 0.0000 | 0.0009 | 0.0010 | 6656  |
|                                          | PD1n  | 11_DOWN_ACTIVATEDTREGS SPECIFIC | 84  | -0.0724 | -0.7831 | 0.7545 | 0.7427 | 1.0000 | 13968 |
|                                          | PD1n  | 12_UP_ACTIVATEDTEFFSPECEIFIC    | 45  | -0.1932 | -1.5590 | 0.0518 | 0.2051 | 0.4370 | 15505 |
|                                          | PD1n  | 13_DOWN_ACTIVATEDTEFFSPECEIFIC  | 52  | -0.1376 | -1.1730 | 0.2795 | 0.3369 | 0.9480 | 2879  |
|                                          | PD1p  | 14_PD1UP                        | 15  | 0.4844  | 2.2133  | 0.0000 | 0.0065 | 0.0170 | 6364  |
|                                          | PD1p  | 15_PD1DOWN                      | 50  | 0.1147  | 0.9838  | 0.4306 | 0.4574 | 0.9980 | 4737  |
|                                          | PD1p  | 16_TF_EXHAUSTED                 | 232 | 0.1216  | 2.1654  | 0.0040 | 0.0073 | 0.0230 | 15854 |
|                                          | PD1p  | 17_EXHAUSTEDUP_MEMORYDOWN       | 15  | 0.3363  | 1.5652  | 0.0565 | 0.0740 | 0.4440 | 15250 |
|                                          | PD1p  | 18_EXHAUSTED_UPMEMORYUP         | 21  | 0.3755  | 2.0439  | 0.0096 | 0.0123 | 0.0540 | 3795  |
|                                          | PD1n  | 19_EXHAUSTEDDOWN_MEMORYDOWN     | 44  | -0.1632 | -1.2505 | 0.1799 | 0.3851 | 0.8860 | 16154 |
|                                          | PD1p  | 20_UPINQUATERNARYCD8            | 75  | 0.2252  | 2.3055  | 0.0000 | 0.0033 | 0.0070 | 14695 |
|                                          | PD1p  | 21_DOWNINQUARTERNARYCD8         | 103 | 0.1043  | 1.2244  | 0.2154 | 0.2538 | 0.9180 | 15694 |
| PD-1 positive<br>- Tumor<br>versus Blood | tumor | 01_TH17 CYTOKINES               | 11  | 0.3875  | 1.5456  | 0.0630 | 0.0856 | 0.4870 | 8680  |
|                                          | tumor | 02_TH17_CORE                    | 35  | 0.4097  | 2.8994  | 0.0000 | 0.0000 | 0.0000 | 2684  |
|                                          | tumor | 03_TH1                          | 66  | 0.3505  | 3.3756  | 0.0000 | 0.0000 | 0.0000 | 4615  |
|                                          | tumor | 04_TH2                          | 71  | 0.2272  | 2.2446  | 0.0038 | 0.0031 | 0.0180 | 3206  |
|                                          | tumor | 05_ITREG                        | 32  | 0.2178  | 1.4552  | 0.0943 | 0.1076 | 0.6210 | 9607  |
|                                          | tumor | 06_IFN_RESPONSIVE_CD4           | 14  | 0.7082  | 3.2406  | 0.0000 | 0.0000 | 0.0000 | 5637  |
|                                          | tumor | 07_CO_INHIB_EXHAUSTIONCD4       | 16  | 0.4188  | 2.0286  | 0.0100 | 0.0078 | 0.0540 | 6868  |
|                                          | tumor | 08_CORE_EXHAUSTION              | 52  | 0.3269  | 2.7007  | 0.0000 | 0.0002 | 0.0010 | 4927  |
|                                          | tumor | 09_ANERGIC                      | 78  | 0.3306  | 3.4225  | 0.0000 | 0.0000 | 0.0000 | 6644  |
|                                          | tumor | 10_UP_ACTIVATEDTREGS SPECIFIC   | 95  | 0.3367  | 3.7802  | 0.0000 | 0.0000 | 0.0000 | 6487  |
|                                          | blood | 11_DOWN_ACTIVATEDTREGS SPECIFIC | 84  | -0.2147 | -2.3146 | 0.0019 | 0.0017 | 0.0080 | 7609  |



|                                             |                                   |                                   |         |         |         |        |        |        |       |
|---------------------------------------------|-----------------------------------|-----------------------------------|---------|---------|---------|--------|--------|--------|-------|
|                                             |                                   | EGSPECIFIC                        |         |         |         |        |        |        |       |
| tumor                                       | 12_UP_ACTIVATEDTEFFSP<br>ECIFIC   | 45                                | 0.1793  | 1.4101  | 0.0992  | 0.1210 | 0.6770 | 9615   |       |
| tumor                                       | 13_DOWN_ACTIVATEDTE<br>FFSPECIFIC | 52                                | 0.2610  | 2.1839  | 0.0039  | 0.0038 | 0.0250 | 10045  |       |
| tumor                                       | 14_PD1UP                          | 15                                | 0.2418  | 1.1087  | 0.2928  | 0.3473 | 0.9790 | 5746   |       |
| tumor                                       | 15_PD1DOWN                        | 50                                | 0.2984  | 2.4519  | 0.0000  | 0.0008 | 0.0040 | 5674   |       |
| tumor                                       | 16_TF_EXHAUSTED                   | 232                               | 0.1363  | 2.4209  | 0.0000  | 0.0007 | 0.0040 | 6567   |       |
| tumor                                       | 17_EXHAUSTEDUP_MEMO<br>RYDOWN     | 15                                | 0.2088  | 0.9710  | 0.4918  | 0.5038 | 0.9970 | 4885   |       |
| tumor                                       | 18_EXHAUSTED_UPMEMO<br>RYUP       | 21                                | 0.5715  | 3.1163  | 0.0000  | 0.0000 | 0.0000 | 6090   |       |
| blood                                       | 19_EXHAUSTEDDOWN_M<br>EMORYDOWN   | 44                                | -0.1339 | -1.0625 | 0.3386  | 0.3697 | 0.9890 | 13420  |       |
| tumor                                       | 20_UPINQUATERNARYCD<br>8          | 75                                | 0.3036  | 3.1216  | 0.0000  | 0.0000 | 0.0000 | 5889   |       |
| tumor                                       | 21_DOWNINQUARTERNAR<br>YCD8       | 103                               | 0.1313  | 1.5418  | 0.0568  | 0.0807 | 0.4910 | 10296  |       |
| PD-1<br>negative -<br>Tumor versus<br>Blood | tumor                             | 01_TH17 CYTOKINES                 | 11      | 0.4675  | 1.8527  | 0.0095 | 0.0334 | 0.1290 | 8959  |
|                                             | tumor                             | 02_TH17_CORE                      | 35      | 0.1668  | 1.1764  | 0.2440 | 0.3179 | 0.9450 | 14717 |
|                                             | blood                             | 03_TH1                            | 66      | -0.0944 | -0.8903 | 0.5833 | 0.5876 | 0.9980 | 18491 |
|                                             | tumor                             | 04_TH2                            | 71      | 0.1887  | 1.8408  | 0.0080 | 0.0281 | 0.1300 | 11020 |
|                                             | blood                             | 05_ITREG                          | 32      | -0.2165 | -1.4720 | 0.0513 | 0.1008 | 0.5880 | 16825 |
|                                             | tumor                             | 06_IFN_RESPONSIVE_CD4             | 14      | 0.4368  | 1.9924  | 0.0020 | 0.0192 | 0.0580 | 10740 |
|                                             | tumor                             | 07_CO_INHIB_EXHAUSTIO<br>NCD4     | 16      | 0.3653  | 1.7804  | 0.0202 | 0.0365 | 0.1870 | 11425 |
|                                             | tumor                             | 08_CORE_EXHUASTION                | 52      | 0.1295  | 1.1089  | 0.3074 | 0.3619 | 0.9700 | 14379 |
|                                             | tumor                             | 09_ANERGIC                        | 78      | 0.2249  | 2.3321  | 0.0000 | 0.0039 | 0.0030 | 14899 |
|                                             | tumor                             | 10_UP_ACTIVATEDTREGS<br>PECIFIC   | 95      | 0.1576  | 1.7515  | 0.0258 | 0.0369 | 0.2130 | 15614 |
|                                             | blood                             | 11_DOWN_ACTIVATEDTR<br>EGSPECIFIC | 84      | -0.3785 | -4.0418 | 0.0000 | 0.0000 | 0.0000 | 7089  |
|                                             | blood                             | 12_UP_ACTIVATEDTEFFSP<br>ECIFIC   | 45      | -0.1410 | -1.1400 | 0.3036 | 0.3260 | 0.9670 | 3784  |
|                                             | tumor                             | 13_DOWN_ACTIVATEDTE<br>FFSPECIFIC | 52      | 0.1570  | 1.3335  | 0.1354 | 0.2007 | 0.7980 | 14661 |
|                                             | blood                             | 14_PD1UP                          | 15      | -0.3891 | -1.8274 | 0.0197 | 0.0209 | 0.1350 | 7096  |
|                                             | tumor                             | 15_PD1DOWN                        | 50      | 0.2418  | 2.0034  | 0.0020 | 0.0234 | 0.0530 | 13245 |
|                                             | blood                             | 16_TF_EXHAUSTED                   | 232     | -0.1788 | -3.2143 | 0.0000 | 0.0000 | 0.0000 | 16061 |
|                                             | tumor                             | 17_EXHAUSTEDUP_MEMO               | 15      | 0.2218  | 1.0334  | 0.3848 | 0.3934 | 0.9910 | 14768 |

|       |                                 | RYDOWN |         |         |        |        |        |       |  |
|-------|---------------------------------|--------|---------|---------|--------|--------|--------|-------|--|
| tumor | 18_EXHAUSTED_UPMEMO<br>RYUP     | 21     | 0.2604  | 1.4245  | 0.1091 | 0.1523 | 0.6750 | 14027 |  |
| blood | 19_EXHAUSTEDDOWN_M<br>EMORYDOWN | 44     | -0.2984 | -2.3490 | 0.0020 | 0.0023 | 0.0080 | 6324  |  |
| tumor | 20_UPINQUATERNARYCD<br>8        | 75     | 0.2057  | 2.1349  | 0.0021 | 0.0123 | 0.0200 | 14171 |  |
| blood | 21_DOWNINQUARTERNAR<br>YCD8     | 103    | -0.1806 | -2.1833 | 0.0020 | 0.0037 | 0.0200 | 16482 |  |

- 1
- 2
- 3
- 4
- 5
- 6
- 7
- 8
- 9
- 10
- 11
- 12
- 13
- 14
- 15
- 16
- 17
- 18
- 19
- 20
- 21
- 22
- 23
- 24

1 **Supplementary Table 10**, Co-correlation analysis with Programmed cell death protein 1 (PD-1)  
 2 for PD-1<sup>high</sup> Tregs from tumors and blood. Shown here are the genes filtered for Pearson  
 3 correlation coefficient greater than 0.8 for tumor-infiltrating lymphocytes.

| Symbol   | TIL_Tregs_p-values | TIL_Tregs_Correlation | Blood_Tregs_p-values | Blood_Tregs_Correlation |
|----------|--------------------|-----------------------|----------------------|-------------------------|
| PDCD1    | 0.0E+00            | 1.00                  | 0.00E+00             | 1.00                    |
| STAT4    | 1.1E-07            | 0.99                  | 2.27E-01             | 0.48                    |
| ICOS     | 5.8E-06            | 0.97                  | 8.56E-01             | 0.08                    |
| BC127952 | 2.9E-05            | 0.95                  | 7.81E-01             | -0.12                   |
| ERI1     | 3.9E-05            | 0.94                  | 6.17E-01             | 0.21                    |
| POLD4    | 4.1E-05            | 0.94                  | 7.90E-02             | -0.65                   |
| PMF1     | 5.6E-05            | 0.94                  | 7.76E-01             | -0.12                   |
| EAF1     | 5.6E-05            | 0.94                  | 4.24E-01             | 0.33                    |
| TNFAIP8  | 6.0E-05            | 0.94                  | 1.98E-01             | 0.51                    |
| LPCAT4   | 6.1E-05            | 0.94                  | 5.08E-02             | -0.71                   |
| PYCARD   | 7.4E-05            | 0.93                  | 4.58E-01             | 0.31                    |
| COL9A2   | 7.5E-05            | 0.93                  | 8.50E-01             | 0.08                    |
| TNFRSF4  | 8.7E-05            | 0.93                  | 7.48E-01             | 0.14                    |
| LAG3     | 8.9E-05            | 0.93                  | 9.19E-02             | 0.63                    |
| PSPC1    | 1.3E-04            | 0.92                  | 3.30E-01             | 0.40                    |
| PPIL4    | 1.5E-04            | 0.92                  | 1.80E-01             | -0.53                   |
| LPXN     | 1.5E-04            | 0.92                  | 3.76E-01             | 0.36                    |
| DNAJC8   | 1.8E-04            | 0.92                  | 4.51E-01             | -0.31                   |
| LAMTOR5  | 1.9E-04            | 0.92                  | 9.38E-01             | -0.03                   |
| SLC35A4  | 2.1E-04            | 0.91                  | 2.04E-01             | 0.50                    |
| SPOCK2   | 2.1E-04            | 0.91                  | 4.46E-01             | 0.32                    |
| APOL6    | 2.2E-04            | 0.91                  | 2.01E-01             | -0.51                   |
| SS18L2   | 2.5E-04            | 0.91                  | 3.75E-01             | -0.36                   |
| NRBF2    | 2.7E-04            | 0.91                  | 9.55E-02             | -0.63                   |
| ARAP2    | 2.7E-04            | 0.91                  | 2.33E-01             | 0.48                    |
| ORAI1    | 2.9E-04            | 0.91                  | 7.29E-02             | -0.66                   |
| ERAP1    | 3.3E-04            | 0.90                  | 3.02E-01             | 0.42                    |
| CD3G     | 3.5E-04            | 0.90                  | 3.31E-01             | 0.40                    |
| INPP5K   | 3.5E-04            | 0.90                  | 1.67E-01             | 0.54                    |
| GOLGA8B  | 3.7E-04            | 0.90                  | 2.76E-01             | -0.44                   |
| SUMO3    | 3.8E-04            | 0.90                  | 1.33E-01             | -0.58                   |

|           |         |      |          |       |
|-----------|---------|------|----------|-------|
| NOL8      | 4.0E-04 | 0.90 | 2.64E-01 | 0.45  |
| AX748212  | 4.1E-04 | 0.90 | 1.47E-01 | 0.56  |
| C3orf37   | 4.8E-04 | 0.89 | 3.52E-01 | 0.38  |
| LINC00598 | 4.9E-04 | 0.89 | 9.48E-01 | 0.03  |
| BC041998  | 4.9E-04 | 0.89 | 1.52E-01 | 0.56  |
| IFFO2     | 5.0E-04 | 0.89 | 2.86E-01 | 0.43  |
| COG1      | 5.3E-04 | 0.89 | 3.41E-01 | 0.39  |
| RNF213    | 5.7E-04 | 0.89 | 1.16E-01 | -0.60 |
| PLAA      | 5.8E-04 | 0.89 | 5.63E-01 | -0.24 |
| METRNL    | 5.9E-04 | 0.89 | 8.79E-01 | 0.06  |
| MASP2     | 6.3E-04 | 0.89 | 5.51E-01 | -0.25 |
| RABGAP1L  | 6.4E-04 | 0.89 | 6.11E-01 | -0.21 |
| KCTD9     | 6.5E-04 | 0.89 | 6.18E-01 | 0.21  |
| IL18R1    | 6.8E-04 | 0.88 | 7.87E-02 | 0.65  |
| MAPK14    | 7.7E-04 | 0.88 | 1.83E-01 | 0.52  |
| DNAJB14   | 7.7E-04 | 0.88 | 6.17E-01 | 0.21  |
| AK095621  | 8.1E-04 | 0.88 | 5.53E-01 | 0.25  |
| PDCL3     | 8.2E-04 | 0.88 | 4.21E-01 | -0.33 |
| SURF2     | 8.2E-04 | 0.88 | 2.83E-01 | -0.43 |
| C19orf55  | 8.9E-04 | 0.88 | 4.25E-01 | -0.33 |
| CXCR6     | 9.2E-04 | 0.88 | 4.38E-01 | 0.32  |
| LTB       | 9.6E-04 | 0.87 | 3.03E-01 | -0.42 |
| PROSC     | 9.6E-04 | 0.87 | 6.65E-01 | 0.18  |
| EXOC5     | 1.1E-03 | 0.87 | 9.20E-01 | 0.04  |
| RASSF2    | 1.1E-03 | 0.87 | 1.76E-01 | 0.53  |
| LOC595101 | 1.1E-03 | 0.87 | 6.89E-01 | 0.17  |
| HCST      | 1.1E-03 | 0.87 | 2.75E-01 | -0.44 |
| STK17B    | 1.1E-03 | 0.87 | 2.85E-01 | -0.43 |
| CD96      | 1.2E-03 | 0.87 | 3.37E-02 | -0.75 |
| KMT2C     | 1.2E-03 | 0.87 | 1.87E-01 | 0.52  |
| GATA3     | 1.2E-03 | 0.87 | 9.22E-01 | -0.04 |
| EIF3M     | 1.3E-03 | 0.86 | 1.86E-01 | -0.52 |
| CCDC53    | 1.3E-03 | 0.86 | 2.63E-01 | -0.45 |
| AX747182  | 1.3E-03 | 0.86 | 1.81E-02 | -0.80 |
| PTPN22    | 1.3E-03 | 0.86 | 1.70E-01 | 0.54  |
| SLC7A5P2  | 1.3E-03 | 0.86 | 9.72E-02 | 0.63  |

|              |         |      |          |       |
|--------------|---------|------|----------|-------|
| NDRG1        | 1.3E-03 | 0.86 | 4.07E-01 | -0.34 |
| SLC35B2      | 1.3E-03 | 0.86 | 5.38E-01 | -0.26 |
| ANXA6        | 1.4E-03 | 0.86 | 6.37E-01 | -0.20 |
| IL12RB2      | 1.4E-03 | 0.86 | 8.11E-01 | -0.10 |
| CCDC130      | 1.5E-03 | 0.86 | 3.45E-01 | -0.39 |
| TNFRSF9      | 1.5E-03 | 0.86 | 4.99E-01 | -0.28 |
| GZMM         | 1.6E-03 | 0.86 | 3.69E-01 | 0.37  |
| LOC728730    | 1.7E-03 | 0.85 | 8.30E-01 | -0.09 |
| RAPGEF6      | 1.8E-03 | 0.85 | 9.77E-01 | -0.01 |
| PTPN4        | 1.8E-03 | 0.85 | 1.04E-01 | -0.62 |
| MAP4K3       | 1.8E-03 | 0.85 | 3.77E-01 | 0.36  |
| CD53         | 1.9E-03 | 0.85 | 8.05E-01 | 0.11  |
| FAM177A1     | 2.0E-03 | 0.85 | 7.20E-01 | 0.15  |
| WAS          | 2.1E-03 | 0.84 | 4.45E-02 | -0.72 |
| EMBP1        | 2.2E-03 | 0.84 | 5.02E-01 | -0.28 |
| ZC3H12A      | 2.3E-03 | 0.84 | 1.37E-01 | 0.57  |
| LRCH4        | 2.3E-03 | 0.84 | 2.10E-01 | -0.50 |
| KSR1         | 2.3E-03 | 0.84 | 3.30E-01 | 0.40  |
| ADSS         | 2.4E-03 | 0.84 | 2.26E-01 | 0.48  |
| LSP1         | 2.4E-03 | 0.84 | 8.80E-01 | 0.06  |
| CAPN2        | 2.5E-03 | 0.84 | 1.16E-01 | -0.60 |
| SLC5A6       | 2.5E-03 | 0.84 | 2.13E-01 | 0.49  |
| AL049935     | 2.6E-03 | 0.84 | 6.13E-01 | 0.21  |
| DIP2B        | 2.6E-03 | 0.84 | 3.90E-01 | 0.35  |
| OXNAD1       | 2.6E-03 | 0.84 | 7.08E-01 | 0.16  |
| RGPD1        | 2.7E-03 | 0.83 | 7.71E-02 | -0.66 |
| LOC100506023 | 2.7E-03 | 0.83 | 4.54E-01 | -0.31 |
| BC016143     | 2.9E-03 | 0.83 | 6.18E-01 | -0.21 |
| ITPR3        | 2.9E-03 | 0.83 | 9.24E-01 | -0.04 |
| TTC39C       | 3.0E-03 | 0.83 | 3.57E-01 | -0.38 |
| ABI1         | 3.1E-03 | 0.83 | 4.60E-01 | -0.31 |
| ADAM8        | 3.1E-03 | 0.83 | 3.15E-01 | 0.41  |
| PSMA2        | 3.1E-03 | 0.83 | 8.67E-01 | -0.07 |
| FBXO33       | 3.3E-03 | 0.83 | 4.91E-01 | -0.29 |
| SLAMF1       | 3.3E-03 | 0.82 | 7.82E-01 | 0.12  |
| FKSG56       | 3.4E-03 | 0.82 | 5.65E-04 | -0.94 |

|           |         |      |          |       |
|-----------|---------|------|----------|-------|
| IL2RB     | 3.4E-03 | 0.82 | 4.06E-01 | -0.34 |
| EDEM3     | 3.4E-03 | 0.82 | 2.88E-01 | 0.43  |
| CBLB      | 3.5E-03 | 0.82 | 2.98E-01 | 0.42  |
| RAF1      | 3.5E-03 | 0.82 | 1.51E-01 | -0.56 |
| ATPAF1    | 3.6E-03 | 0.82 | 3.65E-01 | 0.37  |
| ZBTB25    | 3.6E-03 | 0.82 | 5.81E-01 | -0.23 |
| TYMP      | 3.6E-03 | 0.82 | 7.90E-01 | 0.11  |
| C17orf85  | 3.6E-03 | 0.82 | 6.67E-01 | 0.18  |
| ACBD5     | 3.6E-03 | 0.82 | 3.61E-01 | 0.37  |
| STPG1     | 3.8E-03 | 0.82 | 8.42E-01 | 0.08  |
| BRE       | 3.8E-03 | 0.82 | 3.58E-02 | -0.74 |
| DLG1      | 3.8E-03 | 0.82 | 4.20E-01 | 0.33  |
| CES4A     | 3.8E-03 | 0.82 | 8.29E-01 | -0.09 |
| TERF2IP   | 3.9E-03 | 0.82 | 2.47E-01 | 0.46  |
| ADRBK1    | 3.9E-03 | 0.82 | 1.51E-01 | 0.56  |
| PSMB9     | 3.9E-03 | 0.82 | 9.30E-01 | 0.04  |
| TBX21     | 4.0E-03 | 0.82 | 7.92E-01 | 0.11  |
| RAB11FIP4 | 4.0E-03 | 0.82 | 2.96E-01 | -0.42 |
| SLC25A38  | 4.1E-03 | 0.81 | 6.92E-01 | 0.17  |
| SLC35B1   | 4.1E-03 | 0.81 | 2.46E-01 | 0.46  |
| BCL2L11   | 4.1E-03 | 0.81 | 1.38E-01 | -0.57 |
| TNFSF14   | 4.2E-03 | 0.81 | 4.03E-01 | -0.34 |
| TCRA      | 4.3E-03 | 0.81 | 9.20E-01 | -0.04 |
| PDE4D     | 4.3E-03 | 0.81 | 8.87E-01 | 0.06  |
| TMEM194B  | 4.5E-03 | 0.81 | 5.46E-01 | 0.25  |
| PACS1     | 4.6E-03 | 0.81 | 9.03E-01 | 0.05  |
| KCNN4     | 4.6E-03 | 0.81 | 1.09E-01 | -0.61 |
| SPDYE1    | 4.7E-03 | 0.81 | 3.87E-01 | -0.36 |
| UQCRB     | 4.8E-03 | 0.81 | 9.31E-02 | -0.63 |
| KCTD10    | 4.8E-03 | 0.81 | 6.92E-02 | -0.67 |
| HAUS3     | 4.9E-03 | 0.81 | 7.23E-01 | 0.15  |
| CARD11    | 4.9E-03 | 0.81 | 8.84E-02 | -0.64 |
| RALGDS    | 4.9E-03 | 0.81 | 1.45E-01 | -0.56 |
| DEDD2     | 5.0E-03 | 0.81 | 1.25E-01 | -0.59 |
| PI4KAP1   | 5.1E-03 | 0.80 | 1.92E-01 | -0.51 |
| TBC1D5    | 5.1E-03 | 0.80 | 7.29E-02 | -0.66 |

|                   |         |      |          |       |
|-------------------|---------|------|----------|-------|
| P2RX5-<br>TAX1BP3 | 5.2E-03 | 0.80 | 2.00E-01 | -0.51 |
| PITHD1            | 5.2E-03 | 0.80 | 5.19E-01 | -0.27 |
| IKBKE             | 5.2E-03 | 0.80 | 9.95E-01 | 0.00  |
| ITGAL             | 5.2E-03 | 0.80 | 7.18E-01 | -0.15 |
| AK074476          | 5.3E-03 | 0.80 | 8.02E-01 | 0.11  |
| S100A4            | 5.3E-03 | 0.80 | 5.27E-01 | -0.26 |
| AL832007          | 5.3E-03 | 0.80 | 2.69E-01 | -0.45 |
| COPS7B            | 5.3E-03 | 0.80 | 2.25E-01 | 0.48  |
| THAP6             | 5.4E-03 | 0.80 | 4.17E-01 | 0.34  |

1

2

1

2 **Supplementary Table 11. Antibodies used for cytometry by time of flight (CyTOF).**

| <b>metal conjugate isotope</b> | <b>antigen marker</b> |
|--------------------------------|-----------------------|
| 102,104,105,106,108,110Pd      | MCB                   |
| 89Y                            | CD45                  |
| 141Pr                          | CCR6                  |
| 142Nd                          | CD19                  |
| 143Nd                          | CD127                 |
| 144Nd                          | CCR5                  |
| 145Nd                          | CD4                   |
| 146Nd                          | CD8                   |
| 147Sm                          | CD20                  |
| 148Nd                          | CD16                  |
| 149Sm                          | CD25                  |
| 150Nd                          | Ki67                  |
| 151Eu                          | CD278                 |
| 152Sm                          | TNFa                  |
| 153Eu                          | Tim3                  |
| 154Sm                          | CXCR5                 |
| 155Gd                          | CD27                  |
| 156Gd                          | CD14                  |
| 158Gd                          | CCR4                  |
| 159Tb                          | CCR7                  |
| 160Gd                          | CD28                  |
| 161Dy                          | CD152                 |
| 162Dy                          | FoxP3                 |
| 163Dy                          | CXCR3                 |
| 164Dy                          | CD45RO                |
| 165Ho                          | IFNg                  |
| 166Er                          | CD223                 |
| 167Er                          | Granzyme B            |
| 168Er                          | CD49d                 |
| 169Tm                          | IL17                  |
| 170Er                          | CD3                   |
| 171Yb                          | CD226                 |



|       |        |
|-------|--------|
| 172Yb | CD274  |
| 173Yb | TIGIT  |
| 174Yb | HLA-DR |
| 175Lu | CD279  |
| 176Yb | IL10   |
| 209Bi | CD11b  |
| 191Ir | DNA    |
| 193Ir | DNA    |

1

## 2 **Supplemental References**

3

4 64. Levine JH et al. Data-Driven Phenotypic Dissection of AML Reveals Progenitor-like Cells  
5 that Correlate with Prognosis. *Cell* 2015;162(1):184–197.

6 65. Ciofani M et al. A Validated Regulatory Network for Th17 Cell Specification. *Cell*  
7 2012;151(2):289–303.

8 66. Wei G et al. Genome-wide Analyses of Transcription Factor GATA3-Mediated Gene  
9 Regulation in Distinct T Cell Types. *Immunity* 2011;35(2):299–311.

10 67. Safford M et al. Egr-2 and Egr-3 are negative regulators of T cell activation. *Nat Immunol*  
11 2005;6(5):472–480.

12 68. Duraiswamy J et al. Phenotype, Function, and Gene Expression Profiles of Programmed  
13 Death-1hi CD8 T Cells in Healthy Human Adults. *The Journal of Immunology*  
14 2011;186(7):4200–4212.

15
